# Supplementary material for: Distribution and status of living colonies of Acropora spp. in the reef crests of a protected marine area of the Caribbean (Jardines de la Reina National Park, Cuba)
Source: PeerJ. 2019 Feb 21;7:e6470. doi: 10.7717/peerj.6470 (PMC6387758; doi:10.7717/peerj.6470)
Supplement: Supplemental Information 1 [file peerj-07-6470-s001.xlsx]

## Sheet: Hoja1
Date	Point registered in gps	Type	Specie	Colonies	Patches	Fragments	Lat	Lon	GPS	Observer 1	Observer 2
28/08/2017	197	Colony	A. palmata	1			20.8324	-78.9804	OFY	Fabián	Tamara
28/08/2017	198	Colony	A. palmata	1			20.8323	-78.9805	OFY	Fabián	Tamara
28/08/2017	199	Colony	A. palmata	1			20.8324	-78.9805	OFY	Fabián	Tamara
28/08/2017	201	Colony	A. palmata	1			20.8323	-78.9805	OFY	Fabián	Tamara
28/08/2017	202	Colony	A. palmata	1			20.8323	-78.9805	OFY	Fabián	Tamara
28/08/2017	203	Colony	A. palmata	1			20.8322	-78.9805	OFY	Fabián	Tamara
28/08/2017	204	Colony	A. palmata	1			20.8322	-78.9806	OFY	Fabián	Tamara
28/08/2017	205	Colony	A. palmata	1			20.8323	-78.9806	OFY	Fabián	Tamara
28/08/2017	206	Colony	A. palmata	1			20.8323	-78.9806	OFY	Fabián	Tamara
28/08/2017	208	Colony	A. palmata	1			20.8322	-78.9807	OFY	Fabián	Tamara
28/08/2017	209	Colony	A. palmata	1			20.8322	-78.9806	OFY	Fabián	Tamara
28/08/2017	210	Colony	A. palmata	1			20.8323	-78.9807	OFY	Fabián	Tamara
28/08/2017	211	Colony	A. palmata	1			20.8323	-78.9807	OFY	Fabián	Tamara
28/08/2017	212	Colony	A. palmata	1			20.8322	-78.9807	OFY	Fabián	Tamara
28/08/2017	213	Colony	A. palmata	1			20.8322	-78.9812	OFY	Fabián	Tamara
28/08/2017	214	Colony	A. palmata	1			20.8322	-78.9812	OFY	Fabián	Tamara
28/08/2017	215	Colony	A. palmata	1			20.8322	-78.9812	OFY	Fabián	Tamara
28/08/2017	216	Colony	A. palmata	1			20.8322	-78.9812	OFY	Fabián	Tamara
28/08/2017	217	Patch	A. palmata		1		20.8323	-78.9811	OFY	Fabián	Tamara
28/08/2017	218	Patch	A. palmata		1		20.8323	-78.981	OFY	Fabián	Tamara
28/08/2017	219	Patch	A. palmata		1		20.8323	-78.981	OFY	Fabián	Tamara
28/08/2017	220	Patch	A. palmata		1		20.8323	-78.981	OFY	Fabián	Tamara
28/08/2017	221	Patch	A. palmata		1		20.8322	-78.981	OFY	Fabián	Tamara
28/08/2017	222	Patch	A. palmata		1		20.8322	-78.981	OFY	Fabián	Tamara
28/08/2017	223	Patch	A. palmata		1		20.8322	-78.9811	OFY	Fabián	Tamara
28/08/2017	224	Patch	A. palmata		1		20.8322	-78.9811	OFY	Fabián	Tamara
28/08/2017	225	Patch	A. palmata		1		20.8323	-78.981	OFY	Fabián	Tamara
28/08/2017	226	Colony	A. palmata	1			20.8322	-78.9809	OFY	Fabián	Tamara
28/08/2017	227	Colony	A. palmata	1			20.8323	-78.9809	OFY	Fabián	Tamara
28/08/2017	228	Colony	A. palmata	1			20.8323	-78.9809	OFY	Fabián	Tamara
28/08/2017	229	Colony	A. palmata	1			20.8323	-78.9809	OFY	Fabián	Tamara
28/08/2017	230	Colony	A. palmata	1			20.8323	-78.9809	OFY	Fabián	Tamara
28/08/2017	231	Colony	A. palmata	1			20.8322	-78.9809	OFY	Fabián	Tamara
28/08/2017	232	Colony	A. palmata	1			20.8322	-78.9809	OFY	Fabián	Tamara
28/08/2017	233	Colony	A. palmata	1			20.8322	-78.981	OFY	Fabián	Tamara
28/08/2017	234	Colony	A. palmata	1			20.8321	-78.9809	OFY	Fabián	Tamara
28/08/2017	235	Colony	A. palmata	1			20.8322	-78.9809	OFY	Fabián	Tamara
28/08/2017	236	Colony	A. palmata	1			20.8321	-78.9809	OFY	Fabián	Tamara
28/08/2017	237	Colony	A. palmata	1			20.8321	-78.9809	OFY	Fabián	Tamara
28/08/2017	238	Colony	A. palmata	1			20.8321	-78.9809	OFY	Fabián	Tamara
28/08/2017	239	Colony	A. palmata	1			20.8321	-78.9809	OFY	Fabián	Tamara
28/08/2017	240	Colony	A. palmata	1			20.8321	-78.9809	OFY	Fabián	Tamara
28/08/2017	241	Fragment	A. palmata			5	20.8321	-78.9808	OFY	Fabián	Tamara
28/08/2017	242	Colony	A. palmata	1			20.8321	-78.9808	OFY	Fabián	Tamara
28/08/2017	243	Colony	A. palmata	1			20.8322	-78.9808	OFY	Fabián	Tamara
28/08/2017	244	Colony	A. palmata	1			20.8322	-78.9808	OFY	Fabián	Tamara
28/08/2017	245	Colony	A. palmata	1			20.8322	-78.9808	OFY	Fabián	Tamara
28/08/2017	246	Colony	A. palmata	1			20.8322	-78.9808	OFY	Fabián	Tamara
28/08/2017	247	Colony	A. palmata	1			20.8321	-78.9808	OFY	Fabián	Tamara
28/08/2017	248	Colony	A. palmata	1			20.8322	-78.9807	OFY	Fabián	Tamara
28/08/2017	249	Colony	A. palmata	1			20.8322	-78.9807	OFY	Fabián	Tamara
28/08/2017	250	Patch	A. palmata		2		20.8322	-78.9807	OFY	Fabián	Tamara
28/08/2017	251	Patch	A. palmata		2		20.8322	-78.9807	OFY	Fabián	Tamara
28/08/2017	252	Patch	A. palmata		2		20.8322	-78.9807	OFY	Fabián	Tamara
28/08/2017	253	Patch	A. palmata		2		20.8321	-78.9807	OFY	Fabián	Tamara
28/08/2017	254	Patch	A. palmata		2		20.8321	-78.9807	OFY	Fabián	Tamara
28/08/2017	255	Patch	A. palmata		2		20.8322	-78.9807	OFY	Fabián	Tamara
28/08/2017	256	Patch	A. palmata		2		20.8321	-78.9807	OFY	Fabián	Tamara
29/08/2017	406	Colony	A. palmata	1			20.7769	-78.9144	Rojo CIEC	Claudia	Adrián
29/08/2017	407	Colony	A. palmata	1			20.7774	-78.9159	Rojo CIEC	Claudia	Adrián
29/08/2017	408	Colony	A. palmata	1			20.7774	-78.916	Rojo CIEC	Claudia	Adrián
29/08/2017	409	Colony	A. palmata	1			20.7723	-78.8883	Rojo CIEC	Claudia	Adrián
29/08/2017	410	Colony	A. palmata	1			20.7723	-78.8884	Rojo CIEC	Claudia	Adrián
29/08/2017	411	Colony	A. palmata	1			20.7726	-78.8884	Rojo CIEC	Claudia	Adrián
29/08/2017	412	Colony	A. palmata	1			20.772	-78.8898	Rojo CIEC	Claudia	Adrián
29/08/2017	413	Colony	A. palmata	1			20.772	-78.8901	Rojo CIEC	Claudia	Adrián
29/08/2017	414	Colony	A. palmata	1			20.772	-78.8901	Rojo CIEC	Claudia	Adrián
29/08/2017	415	Colony	A. palmata	1			20.772	-78.8901	Rojo CIEC	Claudia	Adrián
29/08/2017	416	Colony	A. palmata	1			20.772	-78.8901	Rojo CIEC	Claudia	Adrián
29/08/2017	417	Colony	A. palmata	1			20.7719	-78.8901	Rojo CIEC	Claudia	Adrián
29/08/2017	418	Colony	A. palmata	1			20.7722	-78.8904	Rojo CIEC	Claudia	Adrián
29/08/2017	419	Colony	A. palmata	1			20.7722	-78.8904	Rojo CIEC	Claudia	Adrián
29/08/2017	420	Colony	A. palmata	1			20.7722	-78.8904	Rojo CIEC	Claudia	Adrián
29/08/2017	421	Colony	A. palmata	1			20.7721	-78.8904	Rojo CIEC	Claudia	Adrián
29/08/2017	422	Colony	A. palmata	1			20.772	-78.8904	Rojo CIEC	Claudia	Adrián
29/08/2017	423	Colony	A. palmata	1			20.772	-78.891	Rojo CIEC	Claudia	Adrián
29/08/2017	424	Colony	A. palmata	1			20.772	-78.8913	Rojo CIEC	Claudia	Adrián
29/08/2017	425	Colony	A. palmata	1			20.7722	-78.8913	Rojo CIEC	Claudia	Adrián
29/08/2017	426	Colony	A. palmata	1			20.7721	-78.8916	Rojo CIEC	Claudia	Adrián
29/08/2017	427	Colony	A. palmata	1			20.7721	-78.8917	Rojo CIEC	Claudia	Adrián
29/08/2017	428	Colony	A. palmata	1			20.7721	-78.8918	Rojo CIEC	Claudia	Adrián
29/08/2017	429	Colony	A. palmata	1			20.7721	-78.8918	Rojo CIEC	Claudia	Adrián
29/08/2017	430	Colony	A. palmata	1			20.772	-78.8918	Rojo CIEC	Claudia	Adrián
29/08/2017	431	Colony	A. palmata	1			20.7719	-78.892	Rojo CIEC	Claudia	Adrián
29/08/2017	432	Colony	A. palmata	1			20.772	-78.892	Rojo CIEC	Claudia	Adrián
29/08/2017	433	Colony	A. palmata	1			20.772	-78.892	Rojo CIEC	Claudia	Adrián
29/08/2017	434	Colony	A. palmata	1			20.772	-78.892	Rojo CIEC	Claudia	Adrián
29/08/2017	435	Colony	A. palmata	1			20.7721	-78.892	Rojo CIEC	Claudia	Adrián
29/08/2017	436	Colony	A. palmata	1			20.7721	-78.8921	Rojo CIEC	Claudia	Adrián
29/08/2017	437	Colony	A. palmata	1			20.7721	-78.8921	Rojo CIEC	Claudia	Adrián
29/08/2017	438	Colony	A. palmata	1			20.7722	-78.8921	Rojo CIEC	Claudia	Adrián
29/08/2017	439	Colony	A. palmata	1			20.7722	-78.8926	Rojo CIEC	Claudia	Adrián
29/08/2017	440	Colony	A. palmata	1			20.7722	-78.8926	Rojo CIEC	Claudia	Adrián
29/08/2017	441	Colony	A. palmata	1			20.772	-78.8926	Rojo CIEC	Claudia	Adrián
29/08/2017	442	Colony	A. palmata	1			20.772	-78.8927	Rojo CIEC	Claudia	Adrián
29/08/2017	443	Colony	A. palmata	1			20.7721	-78.8926	Rojo CIEC	Claudia	Adrián
29/08/2017	444	Colony	A. palmata	1			20.7721	-78.8927	Rojo CIEC	Claudia	Adrián
29/08/2017	445	Colony	A. palmata	1			20.772	-78.8935	Rojo CIEC	Claudia	Adrián
29/08/2017	446	Colony	A. palmata	1			20.772	-78.8935	Rojo CIEC	Claudia	Adrián
29/08/2017	447	Colony	A. palmata	1			20.772	-78.8936	Rojo CIEC	Claudia	Adrián
29/08/2017	448	Colony	A. palmata	1			20.773	-78.9023	Rojo CIEC	Claudia	Adrián
29/08/2017	449	Colony	A. palmata	1			20.773	-78.9023	Rojo CIEC	Claudia	Adrián
29/08/2017	450	Colony	A. palmata	1			20.7733	-78.9022	Rojo CIEC	Claudia	Adrián
29/08/2017	451	Colony	A. palmata	1			20.7733	-78.9022	Rojo CIEC	Claudia	Adrián
29/08/2017	452	Colony	A. palmata	1			20.7732	-78.9025	Rojo CIEC	Claudia	Adrián
29/08/2017	453	Colony	A. palmata	1			20.7732	-78.9025	Rojo CIEC	Claudia	Adrián
29/08/2017	454	Colony	A. palmata	1			20.7733	-78.9024	Rojo CIEC	Claudia	Adrián
29/08/2017	455	Colony	A. palmata	1			20.7733	-78.9024	Rojo CIEC	Claudia	Adrián
29/08/2017	457	Colony	A. palmata	1			20.7736	-78.9027	Rojo CIEC	Claudia	Adrián
29/08/2017	458	Colony	A. palmata	1			20.774	-78.9028	Rojo CIEC	Claudia	Adrián
29/08/2017	459	Colony	A. palmata	1			20.7741	-78.9028	Rojo CIEC	Claudia	Adrián
29/08/2017	460	Colony	A. palmata	1			20.7741	-78.9028	Rojo CIEC	Claudia	Adrián
29/08/2017	461	Colony	A. palmata	1			20.7741	-78.9028	Rojo CIEC	Claudia	Adrián
29/08/2017	462	Colony	A. palmata	1			20.774	-78.903	Rojo CIEC	Claudia	Adrián
29/08/2017	463	Colony	A. palmata	1			20.7624	-78.8438	Rojo CIEC	Claudia	Adrián
29/08/2017	464	Colony	A. palmata	1			20.7622	-78.8442	Rojo CIEC	Claudia	Adrián
29/08/2017	465	Colony	A. palmata	1			20.7621	-78.8447	Rojo CIEC	Claudia	Adrián
29/08/2017	466	Colony	A. palmata	1			20.762	-78.8456	Rojo CIEC	Claudia	Adrián
29/08/2017	467	Colony	A. palmata	1			20.762	-78.8456	Rojo CIEC	Claudia	Adrián
29/08/2017	468	Colony	A. palmata	1			20.7621	-78.8457	Rojo CIEC	Claudia	Adrián
29/08/2017	469	Colony	A. palmata	1			20.7621	-78.8459	Rojo CIEC	Claudia	Adrián
29/08/2017	470	Colony	A. palmata	1			20.7621	-78.8459	Rojo CIEC	Claudia	Adrián
29/08/2017	471	Colony	A. palmata	1			20.762	-78.8463	Rojo CIEC	Claudia	Adrián
29/08/2017	472	Colony	A. palmata	1			20.762	-78.8463	Rojo CIEC	Claudia	Adrián
29/08/2017	473	Colony	A. palmata	1			20.762	-78.8464	Rojo CIEC	Claudia	Adrián
29/08/2017	474	Colony	A. palmata	1			20.762	-78.8464	Rojo CIEC	Claudia	Adrián
29/08/2017	152	Colony	A. palmata	1			20.7773	-78.9123	2	Evelio	Leonel
29/08/2017	153	Colony	A. palmata	1			20.7773	-78.9123	2	Evelio	Leonel
29/08/2017	154	Colony	A. palmata	1			20.7773	-78.9123	2	Evelio	Leonel
29/08/2017	155	Colony	A. palmata	1			20.7773	-78.9123	2	Evelio	Leonel
29/08/2017	156	Colony	A. palmata	1			20.7773	-78.9123	2	Evelio	Leonel
29/08/2017	157	Colony	A. palmata	1			20.7773	-78.9124	2	Evelio	Leonel
29/08/2017	158	Colony	A. palmata	1			20.7773	-78.9124	2	Evelio	Leonel
29/08/2017	159	Colony	A. palmata	1			20.7773	-78.9124	2	Evelio	Leonel
29/08/2017	160	Colony	A. palmata	1			20.7773	-78.9124	2	Evelio	Leonel
29/08/2017	161	Colony	A. palmata	1			20.7773	-78.9124	2	Evelio	Leonel
29/08/2017	162	Colony	A. palmata	1			20.7773	-78.9123	2	Evelio	Leonel
29/08/2017	163	Colony	A. palmata	1			20.7773	-78.9123	2	Evelio	Leonel
29/08/2017	164	Colony	A. palmata	1			20.7773	-78.9123	2	Evelio	Leonel
29/08/2017	165	Colony	A. palmata	1			20.7772	-78.9126	2	Evelio	Leonel
29/08/2017	169	Colony	A. palmata	1			20.7772	-78.9127	2	Evelio	Leonel
29/08/2017	170	Colony	A. palmata	1			20.7772	-78.9127	2	Evelio	Leonel
29/08/2017	171	Colony	A. palmata	1			20.7772	-78.9127	2	Evelio	Leonel
29/08/2017	172	Colony	A. palmata	1			20.7772	-78.9127	2	Evelio	Leonel
29/08/2017	173	Colony	A. palmata	1			20.7771	-78.9129	2	Evelio	Leonel
29/08/2017	174	Colony	A. palmata	1			20.777	-78.9129	2	Evelio	Leonel
29/08/2017	175	Colony	A. palmata	1			20.777	-78.913	2	Evelio	Leonel
29/08/2017	176	Colony	A. palmata	1			20.777	-78.9143	2	Evelio	Leonel
29/08/2017	177	Colony	A. palmata	1			20.7716	-78.8942	2	Evelio	Leonel
29/08/2017	178	Colony	A. palmata	1			20.7718	-78.8948	2	Evelio	Leonel
29/08/2017	179	Colony	A. palmata	1			20.7719	-78.8949	2	Evelio	Leonel
29/08/2017	180	Colony	A. palmata	1			20.7719	-78.8949	2	Evelio	Leonel
29/08/2017	181	Colony	A. palmata	1			20.7719	-78.8949	2	Evelio	Leonel
29/08/2017	182	Colony	A. palmata	1			20.7719	-78.8949	2	Evelio	Leonel
29/08/2017	185	Colony	A. palmata	1			20.7719	-78.8949	2	Evelio	Leonel
29/08/2017	188	Colony	A. palmata	1			20.7719	-78.8949	2	Evelio	Leonel
29/08/2017	189	Colony	A. palmata	1			20.7718	-78.8949	2	Evelio	Leonel
29/08/2017	190	Colony	A. palmata	1			20.7718	-78.8949	2	Evelio	Leonel
29/08/2017	191	Colony	A. palmata	1			20.7718	-78.8949	2	Evelio	Leonel
29/08/2017	192	Colony	A. palmata	1			20.7718	-78.8949	2	Evelio	Leonel
29/08/2017	193	Colony	A. palmata	1			20.7717	-78.895	2	Evelio	Leonel
29/08/2017	194	Colony	A. palmata	1			20.7717	-78.8951	2	Evelio	Leonel
29/08/2017	195	Colony	A. palmata	1			20.7717	-78.8951	2	Evelio	Leonel
29/08/2017	196	Colony	A. palmata	1			20.7717	-78.8951	2	Evelio	Leonel
29/08/2017	197	Colony	A. palmata	1			20.7717	-78.8951	2	Evelio	Leonel
29/08/2017	198	Colony	A. palmata	1			20.7718	-78.8951	2	Evelio	Leonel
29/08/2017	200	Colony	A. palmata	1			20.7718	-78.8951	2	Evelio	Leonel
29/08/2017	201	Colony	A. palmata	1			20.7717	-78.8952	2	Evelio	Leonel
29/08/2017	208	Colony	A. palmata	1			20.7717	-78.8952	2	Evelio	Leonel
29/08/2017	209	Colony	A. palmata	1			20.7717	-78.8952	2	Evelio	Leonel
29/08/2017	210	Colony	A. palmata	1			20.7717	-78.8952	2	Evelio	Leonel
29/08/2017	211	Colony	A. palmata	1			20.7717	-78.8952	2	Evelio	Leonel
29/08/2017	217	Colony	A. palmata	1			20.7717	-78.8952	2	Evelio	Leonel
29/08/2017	219	Colony	A. palmata	1			20.7717	-78.8952	2	Evelio	Leonel
29/08/2017	223	Colony	A. palmata	1			20.7717	-78.8952	2	Evelio	Leonel
29/08/2017	235	Colony	A. palmata	1			20.7715	-78.8958	2	Evelio	Leonel
29/08/2017	238	Colony	A. palmata	1			20.7716	-78.8959	2	Evelio	Leonel
29/08/2017	239	Colony	A. palmata	1			20.7716	-78.8959	2	Evelio	Leonel
29/08/2017	241	Colony	A. palmata	1			20.7715	-78.8961	2	Evelio	Leonel
29/08/2017	242	Colony	A. palmata	1			20.7715	-78.8962	2	Evelio	Leonel
29/08/2017	243	Colony	A. palmata	1			20.7716	-78.8962	2	Evelio	Leonel
29/08/2017	244	Colony	A. palmata	1			20.7716	-78.8962	2	Evelio	Leonel
29/08/2017	245	Colony	A. palmata	1			20.7716	-78.8963	2	Evelio	Leonel
29/08/2017	246	Colony	A. palmata	1			20.7716	-78.8963	2	Evelio	Leonel
29/08/2017	247	Colony	A. palmata	1			20.7716	-78.8963	2	Evelio	Leonel
29/08/2017	248	Colony	A. palmata	1			20.7715	-78.8963	2	Evelio	Leonel
29/08/2017	249	Colony	A. palmata	1			20.7715	-78.8963	2	Evelio	Leonel
29/08/2017	250	Colony	A. palmata	1			20.7715	-78.8964	2	Evelio	Leonel
29/08/2017	251	Colony	A. palmata	1			20.7716	-78.8966	2	Evelio	Leonel
29/08/2017	252	Colony	A. palmata	1			20.7717	-78.897	2	Evelio	Leonel
29/08/2017	253	Colony	A. palmata	1			20.7717	-78.897	2	Evelio	Leonel
29/08/2017	254	Colony	A. palmata	1			20.7717	-78.8971	2	Evelio	Leonel
29/08/2017	255	Colony	A. palmata	1			20.7716	-78.8971	2	Evelio	Leonel
29/08/2017	256	Colony	A. palmata	1			20.7716	-78.8971	2	Evelio	Leonel
29/08/2017	257	Colony	A. palmata	1			20.7716	-78.8971	2	Evelio	Leonel
29/08/2017	258	Colony	A. palmata	1			20.7715	-78.8971	2	Evelio	Leonel
29/08/2017	259	Colony	A. palmata	1			20.7715	-78.8972	2	Evelio	Leonel
29/08/2017	260	Colony	A. palmata	1			20.7716	-78.8972	2	Evelio	Leonel
29/08/2017	261	Colony	A. palmata	1			20.7716	-78.8972	2	Evelio	Leonel
29/08/2017	262	Colony	A. palmata	1			20.7716	-78.8972	2	Evelio	Leonel
29/08/2017	263	Colony	A. palmata	1			20.769	-78.8616	2	Evelio	Leonel
29/08/2017	264	Patch	A. palmata		3		20.769	-78.8616	2	Evelio	Leonel
29/08/2017	265	Patch	A. palmata		3		20.7689	-78.8616	2	Evelio	Leonel
29/08/2017	266	Patch	A. palmata		3		20.7689	-78.8616	2	Evelio	Leonel
29/08/2017	267	Patch	A. palmata		3		20.7689	-78.8616	2	Evelio	Leonel
29/08/2017	268	Patch	A. palmata		3		20.7689	-78.8616	2	Evelio	Leonel
29/08/2017	269	Patch	A. palmata		3		20.7689	-78.8616	2	Evelio	Leonel
29/08/2017	270	Patch	A. palmata		3		20.7689	-78.8615	2	Evelio	Leonel
29/08/2017	271	Patch	A. palmata		3		20.7689	-78.8616	2	Evelio	Leonel
29/08/2017	272	Colony	A. palmata	1			20.769	-78.8618	2	Evelio	Leonel
29/08/2017	273	Colony	A. palmata	1			20.769	-78.8617	2	Evelio	Leonel
29/08/2017	274	Colony	A. palmata	1			20.7689	-78.8618	2	Evelio	Leonel
29/08/2017	275	Colony	A. palmata	1			20.7689	-78.8617	2	Evelio	Leonel
29/08/2017	276	Colony	A. palmata	1			20.7689	-78.8618	2	Evelio	Leonel
29/08/2017	277	Patch	A. palmata		4		20.7689	-78.8618	2	Evelio	Leonel
29/08/2017	278	Patch	A. palmata		4		20.7689	-78.8618	2	Evelio	Leonel
29/08/2017	279	Patch	A. palmata		4		20.769	-78.8618	2	Evelio	Leonel
29/08/2017	280	Patch	A. palmata		4		20.7689	-78.8618	2	Evelio	Leonel
29/08/2017	281	Patch	A. palmata		4		20.7689	-78.8618	2	Evelio	Leonel
29/08/2017	282	Colony	A. palmata	1			20.7689	-78.8618	2	Evelio	Leonel
29/08/2017	283	Colony	A. palmata	1			20.769	-78.8618	2	Evelio	Leonel
29/08/2017	284	Fragments	A. palmata			13	20.769	-78.8618	2	Evelio	Leonel
29/08/2017	285	Colony	A. palmata	1			20.769	-78.8618	2	Evelio	Leonel
29/08/2017	286	Colony	A. palmata	1			20.769	-78.8618	2	Evelio	Leonel
29/08/2017	287	Colony	A. palmata	1			20.769	-78.8619	2	Evelio	Leonel
29/08/2017	288	Colony	A. palmata	1			20.769	-78.8619	2	Evelio	Leonel
29/08/2017	289	Patch	A. palmata		5		20.769	-78.8619	2	Evelio	Leonel
29/08/2017	290	Patch	A. palmata		5		20.769	-78.8619	2	Evelio	Leonel
29/08/2017	291	Patch	A. palmata		5		20.7691	-78.8619	2	Evelio	Leonel
29/08/2017	292	Patch	A. palmata		5		20.7691	-78.8619	2	Evelio	Leonel
29/08/2017	293	Patch	A. palmata		5		20.7691	-78.862	2	Evelio	Leonel
29/08/2017	294	Patch	A. palmata		5		20.769	-78.862	2	Evelio	Leonel
29/08/2017	295	Patch	A. palmata		6		20.7691	-78.862	2	Evelio	Leonel
29/08/2017	296	Patch	A. palmata		6		20.7691	-78.8619	2	Evelio	Leonel
29/08/2017	297	Patch	A. palmata		6		20.7691	-78.862	2	Evelio	Leonel
29/08/2017	298	Patch	A. palmata		6		20.7691	-78.862	2	Evelio	Leonel
29/08/2017	299	Colony	A. palmata	1			20.7691	-78.862	2	Evelio	Leonel
29/08/2017	300	Colony	A. palmata	1			20.7694	-78.8618	2	Evelio	Leonel
29/08/2017	301	Colony	A. palmata	1			20.7694	-78.8618	2	Evelio	Leonel
29/08/2017	302	Colony	A. palmata	1			20.7694	-78.8618	2	Evelio	Leonel
29/08/2017	303	Colony	A. palmata	1			20.7694	-78.8618	2	Evelio	Leonel
29/08/2017	304	Colony	A. palmata	1			20.7694	-78.8618	2	Evelio	Leonel
29/08/2017	305	Fragments	A. palmata			7	20.7695	-78.8618	2	Evelio	Leonel
29/08/2017	306	Colony	A. palmata	1			20.7695	-78.8618	2	Evelio	Leonel
29/08/2017	307	Colony	A. palmata	1			20.7694	-78.8617	2	Evelio	Leonel
29/08/2017	308	Colony	A. palmata	1			20.7695	-78.8617	2	Evelio	Leonel
29/08/2017	309	Colony	A. palmata	1			20.7695	-78.8617	2	Evelio	Leonel
29/08/2017	310	Colony	A. palmata	1			20.7695	-78.8617	2	Evelio	Leonel
29/08/2017	311	Colony	A. palmata	1			20.7695	-78.8617	2	Evelio	Leonel
29/08/2017	258	Colony	A. palmata	2			20.7777	-78.9173	OFY	Fabián	Tamara
29/08/2017	259	Colony	A. palmata	3			20.7778	-78.9174	OFY	Fabián	Tamara
29/08/2017	260	Colony	A. palmata	1			20.7778	-78.9174	OFY	Fabián	Tamara
29/08/2017	261	Colony	A. palmata	1			20.7781	-78.9177	OFY	Fabián	Tamara
29/08/2017	262	Colony	A. palmata	2			20.778	-78.9179	OFY	Fabián	Tamara
29/08/2017	263	Colony	A. palmata	1			20.7783	-78.918	OFY	Fabián	Tamara
29/08/2017	264	Colony	A. palmata	1			20.7788	-78.9197	OFY	Fabián	Tamara
29/08/2017	266	Colony	A. palmata	1			20.7719	-78.8995	OFY	Fabián	Tamara
29/08/2017	267	Colony	A. palmata	1			20.7718	-78.8997	OFY	Fabián	Tamara
29/08/2017	268	Colony	A. palmata	1			20.7717	-78.8998	OFY	Fabián	Tamara
29/08/2017	269	Colony	A. palmata	1			20.7718	-78.8999	OFY	Fabián	Tamara
29/08/2017	270	Colony	A. palmata	1			20.7721	-78.9005	OFY	Fabián	Tamara
29/08/2017	271	Colony	A. palmata	1			20.7721	-78.9006	OFY	Fabián	Tamara
29/08/2017	272	Colony	A. palmata	1			20.7721	-78.9006	OFY	Fabián	Tamara
29/08/2017	273	Colony	A. palmata	1			20.7721	-78.9006	OFY	Fabián	Tamara
29/08/2017	274	Colony	A. palmata	1			20.7721	-78.9008	OFY	Fabián	Tamara
29/08/2017	275	Colony	A. palmata	1			20.7722	-78.9008	OFY	Fabián	Tamara
29/08/2017	276	Colony	A. palmata	1			20.7722	-78.9008	OFY	Fabián	Tamara
29/08/2017	277	Colony	A. palmata	1			20.7722	-78.9007	OFY	Fabián	Tamara
29/08/2017	278	Colony	A. palmata	1			20.7722	-78.9007	OFY	Fabián	Tamara
29/08/2017	279	Colony	A. palmata	1			20.7723	-78.9007	OFY	Fabián	Tamara
29/08/2017	280	Colony	A. palmata	1			20.7723	-78.9006	OFY	Fabián	Tamara
29/08/2017	281	Colony	A. palmata	1			20.7723	-78.9007	OFY	Fabián	Tamara
29/08/2017	282	Fragments	A. palmata			3	20.7723	-78.9007	OFY	Fabián	Tamara
29/08/2017	283	Colony	A. palmata	1			20.7723	-78.9007	OFY	Fabián	Tamara
29/08/2017	284	Colony	A. palmata	1			20.7723	-78.9007	OFY	Fabián	Tamara
29/08/2017	285	Colony	A. palmata	1			20.7724	-78.9016	OFY	Fabián	Tamara
29/08/2017	286	Colony	A. palmata	1			20.7724	-78.9016	OFY	Fabián	Tamara
29/08/2017	287	Colony	A. palmata	1			20.7725	-78.9016	OFY	Fabián	Tamara
29/08/2017	288	Colony	A. palmata	1			20.7725	-78.9017	OFY	Fabián	Tamara
29/08/2017	289	Colony	A. palmata	1			20.7725	-78.9017	OFY	Fabián	Tamara
29/08/2017	290	Colony	A. palmata	1			20.7725	-78.9017	OFY	Fabián	Tamara
29/08/2017	291	Colony	A. palmata	1			20.7725	-78.9016	OFY	Fabián	Tamara
29/08/2017	292	Colony	A. palmata	1			20.7725	-78.9016	OFY	Fabián	Tamara
29/08/2017	293	Colony	A. palmata	1			20.7727	-78.902	OFY	Fabián	Tamara
29/08/2017	294	Colony	A. palmata	1			20.7727	-78.9019	OFY	Fabián	Tamara
29/08/2017	295	Colony	A. palmata	1			20.7728	-78.9019	OFY	Fabián	Tamara
29/08/2017	296	Colony	A. palmata	1			20.7728	-78.9019	OFY	Fabián	Tamara
29/08/2017	297	Colony	A. palmata	1			20.7729	-78.9018	OFY	Fabián	Tamara
29/08/2017	299	Colony	A. palmata	1			20.7625	-78.8485	OFY	Fabián	Tamara
29/08/2017	300	Colony	A. palmata	1			20.7628	-78.8491	OFY	Fabián	Tamara
29/08/2017	301	Colony	A. palmata	1			20.7628	-78.8491	OFY	Fabián	Tamara
29/08/2017	302	A. cervicornis	A. cervicornis			3	20.7635	-78.8495	OFY	Fabián	Tamara
29/08/2017	303	A. cervicornis	A. cervicornis			8	20.7635	-78.8496	OFY	Fabián	Tamara
29/08/2017	313	Colony	A. palmata	1			20.7446	-78.8222	2	Leslie	Maysel
29/08/2017	314	Colony	A. palmata	1			20.7446	-78.8221	2	Leslie	Maysel
29/08/2017	315	Colony	A. palmata	1			20.7446	-78.8221	2	Leslie	Maysel
29/08/2017	316	Colony	A. palmata	1			20.7446	-78.8221	2	Leslie	Maysel
29/08/2017	304	Colony	A. palmata	1			20.7405	-78.8179	OFY	Lisadys	Víctor
29/08/2017	305	Patch	A. palmata		7		20.7412	-78.8193	OFY	Lisadys	Víctor
29/08/2017	306	Patch	A. palmata		7		20.7413	-78.8193	OFY	Lisadys	Víctor
29/08/2017	307	Patch	A. palmata		7		20.7413	-78.8192	OFY	Lisadys	Víctor
29/08/2017	308	Patch	A. palmata		7		20.7412	-78.8193	OFY	Lisadys	Víctor
29/08/2017	309	Colony	A. palmata	1			20.7413	-78.8194	OFY	Lisadys	Víctor
29/08/2017	310	Colony	A. palmata	1			20.7417	-78.8199	OFY	Lisadys	Víctor
29/08/2017	311	Colony	A. palmata	1			20.7417	-78.8199	OFY	Lisadys	Víctor
29/08/2017	312	Colony	A. palmata	1			20.7417	-78.8199	OFY	Lisadys	Víctor
29/08/2017	313	Colony	A. palmata	1			20.742	-78.8204	OFY	Lisadys	Víctor
29/08/2017	314	Colony	A. palmata	1			20.742	-78.8206	OFY	Lisadys	Víctor
29/08/2017	315	Colony	A. palmata	1			20.7373	-78.8145	OFY	Lisadys	Víctor
29/08/2017	316	Colony	A. palmata	1			20.7373	-78.8145	OFY	Lisadys	Víctor
29/08/2017	317	Colony	A. palmata	1			20.7372	-78.8144	OFY	Lisadys	Víctor
29/08/2017	318	Colony	A. palmata	1			20.7374	-78.8144	OFY	Lisadys	Víctor
29/08/2017	319	Colony	A. palmata	1			20.7374	-78.8147	OFY	Lisadys	Víctor
29/08/2017	320	Colony	A. palmata	1			20.7374	-78.8147	OFY	Lisadys	Víctor
29/08/2017	321	Colony	A. palmata	1			20.7377	-78.815	OFY	Lisadys	Víctor
29/08/2017	322	Colony	A. palmata	1			20.7383	-78.8158	OFY	Lisadys	Víctor
29/08/2017	37	Colony	A. palmata	1			20.7428	-78.821	1	Dayli	Maydel
29/08/2017	38	Colony	A. palmata	1			20.7428	-78.821	1	Dayli	Maydel
29/08/2017	39	Fragments	A. palmata			5	20.7428	-78.821	1	Dayli	Maydel
29/08/2017	40	Colony	A. palmata	1			20.7435	-78.8214	1	Dayli	Maydel
29/08/2017	41	Colony	A. palmata	1			20.6448	-78.6775	1	Dayli	Maydel
29/08/2017	42	Colony	A. palmata	1			20.6447	-78.6775	1	Dayli	Maydel
29/08/2017	43	Colony	A. palmata	1			20.6446	-78.6776	1	Dayli	Maydel
30/08/2017	44	Colony	A. palmata	1			20.6114	-78.5253	1	Dayli	Maydel
30/08/2017	45	Patch	A. palmata		8		20.6102	-78.5202	1	Dayli	Maydel
30/08/2017	46	Colony	A. palmata	1			20.6101	-78.5205	1	Dayli	Maydel
30/08/2017	47	Colony	A. palmata	1			20.6101	-78.5205	1	Dayli	Maydel
30/08/2017	48	Colony	A. palmata	1			20.6101	-78.5203	1	Dayli	Maydel
30/08/2017	49	Colony	A. palmata	1			20.6094	-78.5143	1	Dayli	Maydel
30/08/2017	50	Colony	A. palmata	1			20.6094	-78.5143	1	Dayli	Maydel
30/08/2017	51	Colony	A. palmata	1			20.6098	-78.5157	1	Dayli	Maydel
30/08/2017	52	Colony	A. palmata	1			20.6092	-78.5076	1	Dayli	Maydel
30/08/2017	323	Colony	A. palmata	1			20.6104	-78.5217	OFY	Lisadys	Víctor
30/08/2017	324	Colony	A. palmata	1			20.6104	-78.5216	OFY	Lisadys	Víctor
30/08/2017	325	Colony	A. palmata	1			20.6104	-78.5218	OFY	Lisadys	Víctor
30/08/2017	326	Colony	A. palmata			2	20.6104	-78.522	OFY	Lisadys	Víctor
30/08/2017	327	Colony	A. palmata	1			20.6104	-78.5222	OFY	Lisadys	Víctor
30/08/2017	328	Colony	A. palmata	1			20.6104	-78.5222	OFY	Lisadys	Víctor
30/08/2017	329	Colony	A. palmata	1			20.6104	-78.5222	OFY	Lisadys	Víctor
30/08/2017	332	Colony	A. palmata	1			20.6097	-78.5179	OFY	Lisadys	Víctor
30/08/2017	333	Colony	A. palmata	1			20.6097	-78.5179	OFY	Lisadys	Víctor
30/08/2017	337	Colony	A. palmata	1			20.6098	-78.5181	OFY	Lisadys	Víctor
30/08/2017	339	Colony	A. palmata	1			20.6098	-78.5181	OFY	Lisadys	Víctor
30/08/2017	342	Colony	A. palmata	1		2	20.6098	-78.5181	OFY	Lisadys	Víctor
30/08/2017	344	Colony	A. palmata	1			20.6097	-78.513	OFY	Lisadys	Víctor
30/08/2017	373	Colony	A. palmata	1			20.6087	-78.5065	OFY	Lisadys	Víctor
30/08/2017	374	Colony	A. palmata	1			20.6087	-78.5065	OFY	Lisadys	Víctor
30/08/2017	375	Colony	A. palmata	1			20.6087	-78.5065	OFY	Lisadys	Víctor
30/08/2017	321	Colony	A. palmata	1			20.6116	-78.5278	2	Leslie	Maysel
30/08/2017	322	Colony	A. palmata	1			20.6098	-78.5191	2	Leslie	Maysel
30/08/2017	323	Colony	A. palmata	1			20.6098	-78.5191	2	Leslie	Maysel
30/08/2017	324	Colony	A. palmata	1			20.6099	-78.5191	2	Leslie	Maysel
30/08/2017	325	A. prolifera	A. prolifera	1			20.6109	-78.5192	2	Leslie	Maysel
30/08/2017	326	A. prolifera	A. prolifera	1			20.6108	-78.5192	2	Leslie	Maysel
30/08/2017	327	A. prolifera	A. prolifera	1			20.6109	-78.5192	2	Leslie	Maysel
30/08/2017	329	Colony	A. palmata	1			20.8343	-78.9859	2	Evelio	Leonel
30/08/2017	330	Colony	A. palmata	1			20.8343	-78.9858	2	Evelio	Leonel
30/08/2017	331	Colony	A. palmata	1			20.8343	-78.9859	2	Evelio	Leonel
30/08/2017	332	Colony	A. palmata	1			20.8343	-78.9858	2	Evelio	Leonel
30/08/2017	333	Colony	A. palmata	1			20.8342	-78.9857	2	Evelio	Leonel
30/08/2017	334	Colony	A. palmata	1			20.8342	-78.9857	2	Evelio	Leonel
30/08/2017	335	Colony	A. palmata	1			20.8342	-78.9857	2	Evelio	Leonel
30/08/2017	336	Colony	A. palmata	1			20.8342	-78.9857	2	Evelio	Leonel
30/08/2017	337	Colony	A. palmata	1			20.8342	-78.9857	2	Evelio	Leonel
30/08/2017	338	Colony	A. palmata	1			20.8342	-78.9857	2	Evelio	Leonel
30/08/2017	339	Colony	A. palmata	1			20.8342	-78.9857	2	Evelio	Leonel
30/08/2017	340	Colony	A. palmata	1			20.8342	-78.9857	2	Evelio	Leonel
30/08/2017	341	Colony	A. palmata	1			20.8339	-78.9855	2	Evelio	Leonel
30/08/2017	342	Colony	A. palmata	1			20.8339	-78.9855	2	Evelio	Leonel
30/08/2017	343	Colony	A. palmata	1			20.8339	-78.9855	2	Evelio	Leonel
30/08/2017	344	Colony	A. palmata	1			20.8339	-78.9855	2	Evelio	Leonel
30/08/2017	345	Colony	A. palmata	1			20.8339	-78.9855	2	Evelio	Leonel
30/08/2017	346	Colony	A. palmata	1			20.8339	-78.9855	2	Evelio	Leonel
30/08/2017	347	Colony	A. palmata	1			20.8338	-78.9854	2	Evelio	Leonel
30/08/2017	348	Colony	A. palmata	1			20.8337	-78.9854	2	Evelio	Leonel
30/08/2017	349	Colony	A. palmata	1			20.8337	-78.9853	2	Evelio	Leonel
30/08/2017	350	Colony	A. palmata	1			20.8337	-78.9853	2	Evelio	Leonel
30/08/2017	351	Colony	A. palmata	1			20.8338	-78.9852	2	Evelio	Leonel
30/08/2017	352	Colony	A. palmata	1			20.8338	-78.9852	2	Evelio	Leonel
30/08/2017	353	Patch	A. palmata		9		20.8338	-78.9852	2	Evelio	Leonel
30/08/2017	354	Patch	A. palmata		9		20.8337	-78.9852	2	Evelio	Leonel
30/08/2017	355	Patch	A. palmata		9		20.8337	-78.9852	2	Evelio	Leonel
30/08/2017	356	Patch	A. palmata		9		20.8337	-78.9852	2	Evelio	Leonel
30/08/2017	357	Colony	A. palmata	1			20.8337	-78.9852	2	Evelio	Leonel
30/08/2017	358	Colony	A. palmata	1			20.8337	-78.9852	2	Evelio	Leonel
30/08/2017	359	Colony	A. palmata	1			20.8337	-78.9852	2	Evelio	Leonel
30/08/2017	360	Colony	A. palmata	1			20.8337	-78.9851	2	Evelio	Leonel
30/08/2017	361	Fragments	A. palmata			9	20.8337	-78.9851	2	Evelio	Leonel
30/08/2017	362	Colony	A. palmata	1			20.8337	-78.985	2	Evelio	Leonel
30/08/2017	363	Colony	A. palmata	1			20.8337	-78.985	2	Evelio	Leonel
30/08/2017	364	Colony	A. palmata	1			20.8336	-78.985	2	Evelio	Leonel
30/08/2017	365	Colony	A. palmata	1			20.8336	-78.985	2	Evelio	Leonel
30/08/2017	366	Colony	A. palmata	1			20.8336	-78.985	2	Evelio	Leonel
30/08/2017	367	Colony	A. palmata	1			20.8336	-78.985	2	Evelio	Leonel
30/08/2017	368	Colony	A. palmata	1			20.8336	-78.985	2	Evelio	Leonel
30/08/2017	369	A. cervicornis	A. cervicornis	1			20.8336	-78.985	2	Evelio	Leonel
30/08/2017	370	Colony	A. palmata	1			20.8336	-78.9849	2	Evelio	Leonel
30/08/2017	371	Colony	A. palmata	1			20.8336	-78.9848	2	Evelio	Leonel
30/08/2017	372	Colony	A. palmata	1			20.8336	-78.9848	2	Evelio	Leonel
30/08/2017	373	Colony	A. palmata	1			20.8336	-78.9847	2	Evelio	Leonel
30/08/2017	374	Colony	A. palmata	1			20.8335	-78.9847	2	Evelio	Leonel
30/08/2017	375	Colony	A. palmata	1			20.8335	-78.9847	2	Evelio	Leonel
30/08/2017	376	Colony	A. palmata	1			20.8336	-78.9847	2	Evelio	Leonel
30/08/2017	377	Colony	A. palmata	1			20.8335	-78.9845	2	Evelio	Leonel
30/08/2017	378	Colony	A. palmata	1			20.8335	-78.9845	2	Evelio	Leonel
30/08/2017	379	Fragments	A. palmata	1		7	20.8331	-78.984	2	Evelio	Leonel
30/08/2017	380	Colony	A. palmata	1			20.8331	-78.984	2	Evelio	Leonel
30/08/2017	381	Colony	A. palmata	1			20.8331	-78.984	2	Evelio	Leonel
30/08/2017	382	Colony	A. palmata	1			20.8329	-78.9835	2	Evelio	Leonel
30/08/2017	383	Colony	A. palmata	1			20.8328	-78.9835	2	Evelio	Leonel
30/08/2017	384	Colony	A. palmata	1			20.8328	-78.9834	2	Evelio	Leonel
30/08/2017	385	Colony	A. palmata	1			20.8328	-78.9834	2	Evelio	Leonel
30/08/2017	386	Colony	A. palmata	1			20.8329	-78.9834	2	Evelio	Leonel
30/08/2017	387	Colony	A. palmata	1			20.8328	-78.9833	2	Evelio	Leonel
30/08/2017	388	Colony	A. palmata	1			20.8329	-78.9832	2	Evelio	Leonel
30/08/2017	389	Colony	A. palmata	1			20.8327	-78.9832	2	Evelio	Leonel
30/08/2017	390	Colony	A. palmata	1			20.8327	-78.9832	2	Evelio	Leonel
30/08/2017	391	Colony	A. palmata	1			20.8327	-78.9831	2	Evelio	Leonel
30/08/2017	392	Colony	A. palmata	1			20.8327	-78.9831	2	Evelio	Leonel
30/08/2017	393	Colony	A. palmata	1			20.8327	-78.9831	2	Evelio	Leonel
30/08/2017	394	Colony	A. palmata	1			20.8326	-78.9831	2	Evelio	Leonel
30/08/2017	395	Colony	A. palmata	1			20.8324	-78.9827	2	Evelio	Leonel
30/08/2017	396	Colony	A. palmata	1			20.8326	-78.9827	2	Evelio	Leonel
30/08/2017	397	Colony	A. palmata	1			20.8326	-78.9827	2	Evelio	Leonel
30/08/2017	398	Colony	A. palmata	1			20.8326	-78.9827	2	Evelio	Leonel
30/08/2017	399	Colony	A. palmata	1			20.8325	-78.9825	2	Evelio	Leonel
30/08/2017	400	Colony	A. palmata	1			20.8326	-78.9825	2	Evelio	Leonel
30/08/2017	401	Colony	A. palmata	1			20.8325	-78.9825	2	Evelio	Leonel
30/08/2017	402	Fragments	A. palmata			6	20.8325	-78.9825	2	Evelio	Leonel
30/08/2017	403	Colony	A. palmata	1			20.8325	-78.9824	2	Evelio	Leonel
30/08/2017	404	Colony	A. palmata	1			20.8325	-78.9824	2	Evelio	Leonel
30/08/2017	405	Colony	A. palmata	1			20.8325	-78.9824	2	Evelio	Leonel
30/08/2017	406	Colony	A. palmata	1			20.8325	-78.9824	2	Evelio	Leonel
30/08/2017	407	Colony	A. palmata	1			20.8325	-78.9824	2	Evelio	Leonel
30/08/2017	408	Colony	A. palmata	1			20.8325	-78.9824	2	Evelio	Leonel
30/08/2017	409	Colony	A. palmata	1			20.8325	-78.9823	2	Evelio	Leonel
30/08/2017	410	Colony	A. palmata	1			20.8325	-78.9823	2	Evelio	Leonel
30/08/2017	411	Colony	A. palmata	1			20.8325	-78.9823	2	Evelio	Leonel
30/08/2017	412	Colony	A. palmata	1			20.8325	-78.9823	2	Evelio	Leonel
30/08/2017	413	Colony	A. palmata	1			20.8325	-78.9822	2	Evelio	Leonel
30/08/2017	414	Colony	A. palmata	1			20.8325	-78.9821	2	Evelio	Leonel
30/08/2017	415	Colony	A. palmata	1			20.8326	-78.9821	2	Evelio	Leonel
30/08/2017	416	Colony	A. palmata	1			20.8326	-78.982	2	Evelio	Leonel
30/08/2017	417	Colony	A. palmata	1			20.8325	-78.982	2	Evelio	Leonel
30/08/2017	418	Colony	A. palmata	1			20.8325	-78.982	2	Evelio	Leonel
30/08/2017	419	Colony	A. palmata	1			20.8326	-78.9821	2	Evelio	Leonel
30/08/2017	420	Colony	A. palmata	1			20.8325	-78.9821	2	Evelio	Leonel
30/08/2017	421	Colony	A. palmata	1			20.8325	-78.9821	2	Evelio	Leonel
30/08/2017	422	Colony	A. palmata	1			20.8325	-78.982	2	Evelio	Leonel
30/08/2017	423	Colony	A. palmata	1			20.8325	-78.982	2	Evelio	Leonel
30/08/2017	424	Colony	A. palmata	1			20.8325	-78.982	2	Evelio	Leonel
30/08/2017	425	Fragments	A. palmata	1		12	20.8325	-78.982	2	Evelio	Leonel
30/08/2017	426	Colony	A. palmata	1			20.8325	-78.982	2	Evelio	Leonel
30/08/2017	427	Colony	A. palmata	1			20.8324	-78.982	2	Evelio	Leonel
30/08/2017	428	Colony	A. palmata	1			20.8324	-78.9821	2	Evelio	Leonel
30/08/2017	429	Colony	A. palmata	1			20.8325	-78.982	2	Evelio	Leonel
30/08/2017	430	Colony	A. palmata	1			20.8325	-78.9818	2	Evelio	Leonel
30/08/2017	431	Fragments	A. palmata	1		5	20.8325	-78.9818	2	Evelio	Leonel
30/08/2017	432	Colony	A. palmata	1			20.8325	-78.9818	2	Evelio	Leonel
30/08/2017	433	Colony	A. palmata	1			20.8322	-78.9813	2	Evelio	Leonel
30/08/2017	435	Colony	A. palmata	1			20.8322	-78.9813	2	Evelio	Leonel
30/08/2017	436	Colony	A. palmata	1			20.8322	-78.9813	2	Evelio	Leonel
30/08/2017	437	Colony	A. palmata	1			20.8322	-78.9813	2	Evelio	Leonel
30/08/2017	438	Colony	A. palmata	1			20.8322	-78.9813	2	Evelio	Leonel
30/08/2017	439	Colony	A. palmata	1			20.8322	-78.9813	2	Evelio	Leonel
30/08/2017	440	Colony	A. palmata	1			20.8322	-78.9812	2	Evelio	Leonel
30/08/2017	441	Colony	A. palmata	1			20.8322	-78.9812	2	Evelio	Leonel
30/08/2017	442	Colony	A. palmata	1			20.8322	-78.9812	2	Evelio	Leonel
30/08/2017	443	Colony	A. palmata	1			20.8322	-78.9812	2	Evelio	Leonel
30/08/2017	444	Colony	A. palmata	1			20.8322	-78.9812	2	Evelio	Leonel
30/08/2017	445	Colony	A. palmata	1			20.8322	-78.9812	2	Evelio	Leonel
30/08/2017	446	Colony	A. palmata	1			20.8322	-78.9812	2	Evelio	Leonel
30/08/2017	447	Colony	A. palmata	1			20.8322	-78.9812	2	Evelio	Leonel
30/08/2017	448	Colony	A. palmata	1			20.8322	-78.9812	2	Evelio	Leonel
30/08/2017	449	Colony	A. palmata	1			20.8321	-78.9812	2	Evelio	Leonel
30/08/2017	450	Colony	A. palmata	1			20.8335	-78.9881	2	Evelio	Leonel
30/08/2017	451	Colony	A. palmata	1			20.8335	-78.9887	2	Evelio	Leonel
30/08/2017	452	Colony	A. palmata	1			20.8335	-78.9887	2	Evelio	Leonel
30/08/2017	453	Colony	A. palmata	1			20.8335	-78.9887	2	Evelio	Leonel
30/08/2017	454	Colony	A. palmata	1			20.8335	-78.9887	2	Evelio	Leonel
30/08/2017	455	Colony	A. palmata	1			20.8335	-78.989	2	Evelio	Leonel
30/08/2017	456	Colony	A. palmata	1			20.8335	-78.9891	2	Evelio	Leonel
30/08/2017	457	Colony	A. palmata	1			20.8334	-78.9891	2	Evelio	Leonel
30/08/2017	458	Colony	A. palmata	1			20.8334	-78.9891	2	Evelio	Leonel
30/08/2017	459	Colony	A. palmata	1			20.8334	-78.9891	2	Evelio	Leonel
30/08/2017	460	Colony	A. palmata	1			20.8334	-78.9891	2	Evelio	Leonel
30/08/2017	461	Colony	A. palmata	1			20.8334	-78.9891	2	Evelio	Leonel
30/08/2017	462	Colony	A. palmata	1			20.8334	-78.9892	2	Evelio	Leonel
30/08/2017	463	Colony	A. palmata	1			20.8334	-78.9891	2	Evelio	Leonel
30/08/2017	464	Colony	A. palmata	1			20.8334	-78.9891	2	Evelio	Leonel
30/08/2017	465	Colony	A. palmata	1			20.8334	-78.9891	2	Evelio	Leonel
30/08/2017	466	Colony	A. palmata	1			20.8334	-78.9891	2	Evelio	Leonel
30/08/2017	467	Colony	A. palmata	1			20.8335	-78.9891	2	Evelio	Leonel
30/08/2017	468	Colony	A. palmata	1			20.8335	-78.9891	2	Evelio	Leonel
30/08/2017	469	Colony	A. palmata	1			20.8335	-78.9891	2	Evelio	Leonel
30/08/2017	470	Colony	A. palmata	1			20.8334	-78.9892	2	Evelio	Leonel
30/08/2017	471	Colony	A. palmata	1			20.8334	-78.9892	2	Evelio	Leonel
30/08/2017	472	Colony	A. palmata	1			20.8334	-78.9892	2	Evelio	Leonel
30/08/2017	473	Colony	A. palmata	1			20.8335	-78.9892	2	Evelio	Leonel
30/08/2017	474	Colony	A. palmata	1			20.8335	-78.9892	2	Evelio	Leonel
30/08/2017	475	Colony	A. palmata	1			20.8335	-78.9892	2	Evelio	Leonel
30/08/2017	476	Colony	A. palmata	1			20.8334	-78.9892	2	Evelio	Leonel
30/08/2017	477	Colony	A. palmata	1			20.8334	-78.9892	2	Evelio	Leonel
30/08/2017	478	Colony	A. palmata	1			20.8334	-78.9892	2	Evelio	Leonel
30/08/2017	479	Colony	A. palmata	1			20.8334	-78.9892	2	Evelio	Leonel
30/08/2017	480	Colony	A. palmata	1			20.8334	-78.9892	2	Evelio	Leonel
30/08/2017	481	Colony	A. palmata	1			20.8334	-78.9892	2	Evelio	Leonel
30/08/2017	482	Fragments	A. palmata			9	20.8334	-78.9892	2	Evelio	Leonel
30/08/2017	483	Colony	A. palmata	1			20.8334	-78.9892	2	Evelio	Leonel
30/08/2017	484	Colony	A. palmata	1			20.8334	-78.9893	2	Evelio	Leonel
30/08/2017	485	Colony	A. palmata	1			20.8334	-78.9893	2	Evelio	Leonel
30/08/2017	486	Colony	A. palmata	1			20.8334	-78.9893	2	Evelio	Leonel
30/08/2017	487	Colony	A. palmata	1			20.8334	-78.9893	2	Evelio	Leonel
30/08/2017	488	Patch	A. palmata		10		20.8334	-78.9892	2	Evelio	Leonel
30/08/2017	489	Patch	A. palmata		10		20.8335	-78.9892	2	Evelio	Leonel
30/08/2017	490	Patch	A. palmata		10		20.8335	-78.9893	2	Evelio	Leonel
30/08/2017	491	Patch	A. palmata		10		20.8335	-78.9893	2	Evelio	Leonel
30/08/2017	492	Patch	A. palmata		10		20.8335	-78.9893	2	Evelio	Leonel
30/08/2017	493	Patch	A. palmata		10		20.8335	-78.9893	2	Evelio	Leonel
30/08/2017	494	Patch	A. palmata		10		20.8335	-78.9893	2	Evelio	Leonel
30/08/2017	495	Colony	A. palmata	1			20.8335	-78.9893	2	Evelio	Leonel
30/08/2017	496	Colony	A. palmata	1			20.8335	-78.9893	2	Evelio	Leonel
30/08/2017	497	Colony	A. palmata	1			20.8335	-78.9893	2	Evelio	Leonel
30/08/2017	498	Colony	A. palmata	1			20.8335	-78.9893	2	Evelio	Leonel
30/08/2017	499	Colony	A. palmata	1			20.8335	-78.9893	2	Evelio	Leonel
30/08/2017	500	Colony	A. palmata	1			20.8335	-78.9893	2	Evelio	Leonel
30/08/2017	501	Colony	A. palmata	1			20.8335	-78.9893	2	Evelio	Leonel
30/08/2017	502	Colony	A. palmata	1			20.8335	-78.9893	2	Evelio	Leonel
30/08/2017	503	Colony	A. palmata	1			20.8335	-78.9894	2	Evelio	Leonel
30/08/2017	504	Colony	A. palmata	1			20.8335	-78.9894	2	Evelio	Leonel
30/08/2017	505	Colony	A. palmata	1			20.8335	-78.9894	2	Evelio	Leonel
30/08/2017	506	Colony	A. palmata	1			20.8335	-78.9894	2	Evelio	Leonel
30/08/2017	507	Colony	A. palmata	1			20.8335	-78.9894	2	Evelio	Leonel
30/08/2017	508	Colony	A. palmata	1			20.8335	-78.9894	2	Evelio	Leonel
30/08/2017	509	Colony	A. palmata	1			20.8335	-78.9894	2	Evelio	Leonel
30/08/2017	510	Colony	A. palmata	1			20.8335	-78.9894	2	Evelio	Leonel
30/08/2017	511	Colony	A. palmata	1			20.8335	-78.9894	2	Evelio	Leonel
30/08/2017	512	Colony	A. palmata	1			20.8335	-78.9894	2	Evelio	Leonel
30/08/2017	513	Colony	A. palmata	1			20.8335	-78.9894	2	Evelio	Leonel
30/08/2017	514	Colony	A. palmata	1			20.8335	-78.9894	2	Evelio	Leonel
30/08/2017	515	Colony	A. palmata	1			20.8335	-78.9894	2	Evelio	Leonel
30/08/2017	516	Colony	A. palmata	1			20.8335	-78.9894	2	Evelio	Leonel
30/08/2017	517	Colony	A. palmata	1			20.8335	-78.9894	2	Evelio	Leonel
30/08/2017	518	Colony	A. palmata	1			20.8335	-78.9895	2	Evelio	Leonel
30/08/2017	519	Colony	A. palmata	1			20.8335	-78.9895	2	Evelio	Leonel
30/08/2017	520	Colony	A. palmata	1			20.8335	-78.9895	2	Evelio	Leonel
30/08/2017	521	Colony	A. palmata	1			20.8334	-78.9895	2	Evelio	Leonel
30/08/2017	522	Colony	A. palmata	1		1	20.8334	-78.9895	2	Evelio	Leonel
30/08/2017	523	Fragments	A. palmata				20.8334	-78.9895	2	Evelio	Leonel
30/08/2017	524	Colony	A. palmata	1			20.8335	-78.9896	2	Evelio	Leonel
42977	475	Colony	A. palmata	1			20.8323	-78.9804	Rojo CIEC	Claudia	Adrián
42977	476	Colony	A. palmata	1			20.8323	-78.9804	Rojo CIEC	Claudia	Adrián
42977	477	Colony	A. palmata	1			20.8323	-78.9804	Rojo CIEC	Claudia	Adrián
42977	478	Colony	A. palmata	1			20.8324	-78.9804	Rojo CIEC	Claudia	Adrián
42977	479	Colony	A. palmata	1			20.8324	-78.9803	Rojo CIEC	Claudia	Adrián
42977	480	Colony	A. palmata	1			20.8323	-78.9804	Rojo CIEC	Claudia	Adrián
42977	481	Colony	A. palmata	1			20.832	-78.9801	Rojo CIEC	Claudia	Adrián
42977	482	Colony	A. palmata	1			20.8319	-78.9799	Rojo CIEC	Claudia	Adrián
42977	483	Colony	A. palmata	1			20.8319	-78.9799	Rojo CIEC	Claudia	Adrián
42977	484	Colony	A. palmata	1			20.832	-78.9798	Rojo CIEC	Claudia	Adrián
42977	485	Colony	A. palmata	1			20.8319	-78.9798	Rojo CIEC	Claudia	Adrián
42977	486	Colony	A. palmata	1			20.8319	-78.9798	Rojo CIEC	Claudia	Adrián
42977	487	Colony	A. palmata	1			20.832	-78.9797	Rojo CIEC	Claudia	Adrián
42977	488	Colony	A. palmata	1			20.832	-78.9797	Rojo CIEC	Claudia	Adrián
42977	489	Colony	A. palmata	1			20.832	-78.9797	Rojo CIEC	Claudia	Adrián
42977	490	Colony	A. palmata	1			20.832	-78.9797	Rojo CIEC	Claudia	Adrián
42977	491	Colony	A. palmata	1			20.8319	-78.9796	Rojo CIEC	Claudia	Adrián
42977	492	Patch	A. palmata		11		20.832	-78.9796	Rojo CIEC	Claudia	Adrián
42977	493	Patch	A. palmata		11		20.8318	-78.9795	Rojo CIEC	Claudia	Adrián
42977	494	Patch	A. palmata		11		20.8319	-78.9795	Rojo CIEC	Claudia	Adrián
42977	495	Patch	A. palmata		11		20.8319	-78.9795	Rojo CIEC	Claudia	Adrián
42977	496	Colony	A. palmata	1			20.8318	-78.9795	Rojo CIEC	Claudia	Adrián
42977	497	Colony	A. palmata	1			20.8318	-78.9795	Rojo CIEC	Claudia	Adrián
42977	498	Colony	A. palmata	1			20.8319	-78.9795	Rojo CIEC	Claudia	Adrián
42977	499	Colony	A. palmata	1			20.8318	-78.9794	Rojo CIEC	Claudia	Adrián
42977	500	Colony	A. palmata	1			20.8317	-78.9792	Rojo CIEC	Claudia	Adrián
42977	501	Colony	A. palmata	1			20.8316	-78.9791	Rojo CIEC	Claudia	Adrián
42977	502	Colony	A. palmata	1			20.8314	-78.9791	Rojo CIEC	Claudia	Adrián
42977	503	Colony	A. palmata	1			20.8314	-78.979	Rojo CIEC	Claudia	Adrián
42977	504	Colony	A. palmata	1			20.8314	-78.979	Rojo CIEC	Claudia	Adrián
42977	505	Colony	A. palmata	1			20.8314	-78.979	Rojo CIEC	Claudia	Adrián
42977	506	Colony	A. palmata	1			20.8314	-78.979	Rojo CIEC	Claudia	Adrián
42977	507	Colony	A. palmata	1			20.8314	-78.979	Rojo CIEC	Claudia	Adrián
42977	508	Colony	A. palmata	1			20.8314	-78.979	Rojo CIEC	Claudia	Adrián
42977	509	Colony	A. palmata	1			20.8314	-78.979	Rojo CIEC	Claudia	Adrián
42977	510	Colony	A. palmata	1			20.8314	-78.979	Rojo CIEC	Claudia	Adrián
42977	511	Colony	A. palmata	1			20.8314	-78.979	Rojo CIEC	Claudia	Adrián
42977	512	Colony	A. palmata	1			20.8315	-78.979	Rojo CIEC	Claudia	Adrián
42977	513	Colony	A. palmata	1			20.8315	-78.979	Rojo CIEC	Claudia	Adrián
42977	514	Colony	A. palmata	1			20.8315	-78.979	Rojo CIEC	Claudia	Adrián
42977	515	Colony	A. palmata	1			20.8315	-78.979	Rojo CIEC	Claudia	Adrián
42977	516	Colony	A. palmata	1			20.8315	-78.979	Rojo CIEC	Claudia	Adrián
42977	517	Colony	A. palmata	1			20.8315	-78.979	Rojo CIEC	Claudia	Adrián
42977	518	Colony	A. palmata	1			20.8315	-78.9789	Rojo CIEC	Claudia	Adrián
42977	519	Patch	A. palmata		12		20.8315	-78.9789	Rojo CIEC	Claudia	Adrián
42977	520	Patch	A. palmata		12		20.8315	-78.9789	Rojo CIEC	Claudia	Adrián
42977	521	Patch	A. palmata		12		20.8314	-78.9789	Rojo CIEC	Claudia	Adrián
42977	522	Colony	A. palmata	1			20.8315	-78.9789	Rojo CIEC	Claudia	Adrián
42977	523	Colony	A. palmata	1			20.8314	-78.9789	Rojo CIEC	Claudia	Adrián
42977	524	Colony	A. palmata	1			20.8314	-78.9789	Rojo CIEC	Claudia	Adrián
42977	525	Colony	A. palmata	1			20.8314	-78.9789	Rojo CIEC	Claudia	Adrián
42977	526	Colony	A. palmata	1			20.8314	-78.9789	Rojo CIEC	Claudia	Adrián
42977	527	Colony	A. palmata	1			20.8313	-78.9788	Rojo CIEC	Claudia	Adrián
42977	528	Colony	A. palmata	1			20.8313	-78.9788	Rojo CIEC	Claudia	Adrián
42977	529	Colony	A. palmata	1			20.8313	-78.9787	Rojo CIEC	Claudia	Adrián
42977	530	Colony	A. palmata	1			20.8313	-78.9787	Rojo CIEC	Claudia	Adrián
42977	531	Colony	A. palmata	1			20.8313	-78.9787	Rojo CIEC	Claudia	Adrián
42977	532	Colony	A. palmata	1			20.8313	-78.9787	Rojo CIEC	Claudia	Adrián
42977	533	Colony	A. palmata	1			20.8313	-78.9787	Rojo CIEC	Claudia	Adrián
42977	534	Colony	A. palmata	1			20.8313	-78.9787	Rojo CIEC	Claudia	Adrián
42977	535	Colony	A. palmata	1			20.8313	-78.9787	Rojo CIEC	Claudia	Adrián
42977	536	Colony	A. palmata	1			20.8313	-78.9787	Rojo CIEC	Claudia	Adrián
42977	537	Colony	A. palmata	1			20.8313	-78.9787	Rojo CIEC	Claudia	Adrián
42977	538	Colony	A. palmata	1			20.8313	-78.9787	Rojo CIEC	Claudia	Adrián
42977	539	Colony	A. palmata	1			20.8313	-78.9787	Rojo CIEC	Claudia	Adrián
42977	540	Colony	A. palmata	1			20.8312	-78.9787	Rojo CIEC	Claudia	Adrián
42977	541	Colony	A. palmata	1			20.8312	-78.9787	Rojo CIEC	Claudia	Adrián
42977	542	Colony	A. palmata	1			20.8312	-78.9787	Rojo CIEC	Claudia	Adrián
42977	543	Colony	A. palmata	1			20.8312	-78.9787	Rojo CIEC	Claudia	Adrián
42977	544	Colony	A. palmata	1			20.8312	-78.9786	Rojo CIEC	Claudia	Adrián
42977	545	Colony	A. palmata	1			20.8312	-78.9786	Rojo CIEC	Claudia	Adrián
42977	546	Colony	A. palmata	1			20.8313	-78.9786	Rojo CIEC	Claudia	Adrián
42977	547	Colony	A. palmata	1			20.8313	-78.9786	Rojo CIEC	Claudia	Adrián
42977	548	Colony	A. palmata	1			20.8313	-78.9786	Rojo CIEC	Claudia	Adrián
42977	549	Colony	A. palmata	1			20.8313	-78.9786	Rojo CIEC	Claudia	Adrián
42977	550	Colony	A. palmata	1			20.8313	-78.9786	Rojo CIEC	Claudia	Adrián
42977	551	Colony	A. palmata	1			20.8313	-78.9785	Rojo CIEC	Claudia	Adrián
42977	552	Colony	A. palmata	1			20.8313	-78.9785	Rojo CIEC	Claudia	Adrián
42977	553	Colony	A. palmata	1			20.8313	-78.9785	Rojo CIEC	Claudia	Adrián
42977	554	Colony	A. palmata	1			20.8314	-78.9785	Rojo CIEC	Claudia	Adrián
42977	555	Colony	A. palmata	1			20.8314	-78.9785	Rojo CIEC	Claudia	Adrián
42977	556	Colony	A. palmata	1			20.8314	-78.9785	Rojo CIEC	Claudia	Adrián
42977	557	Colony	A. palmata	1			20.8314	-78.9785	Rojo CIEC	Claudia	Adrián
42977	558	Patch	A. palmata		13		20.8314	-78.9785	Rojo CIEC	Claudia	Adrián
42977	559	Patch	A. palmata		13		20.8314	-78.9785	Rojo CIEC	Claudia	Adrián
42977	560	Patch	A. palmata		13		20.8314	-78.9785	Rojo CIEC	Claudia	Adrián
42977	561	Patch	A. palmata		13		20.8314	-78.9785	Rojo CIEC	Claudia	Adrián
42977	562	Patch	A. palmata		13		20.8314	-78.9786	Rojo CIEC	Claudia	Adrián
42977	563	Colony	A. palmata	1			20.8314	-78.9785	Rojo CIEC	Claudia	Adrián
42977	564	Colony	A. palmata	1			20.8314	-78.9784	Rojo CIEC	Claudia	Adrián
42977	565	Colony	A. palmata	1			20.8314	-78.9784	Rojo CIEC	Claudia	Adrián
42977	566	Colony	A. palmata	1			20.8314	-78.9784	Rojo CIEC	Claudia	Adrián
42977	567	Colony	A. palmata	1			20.8314	-78.9784	Rojo CIEC	Claudia	Adrián
42977	568	Colony	A. palmata	1			20.8314	-78.9784	Rojo CIEC	Claudia	Adrián
42977	569	Colony	A. palmata	1			20.8314	-78.9784	Rojo CIEC	Claudia	Adrián
42977	570	Colony	A. palmata	1			20.8314	-78.9783	Rojo CIEC	Claudia	Adrián
42977	571	Colony	A. palmata	1			20.8314	-78.9783	Rojo CIEC	Claudia	Adrián
42977	572	Colony	A. palmata	1			20.8314	-78.9783	Rojo CIEC	Claudia	Adrián
42977	573	Colony	A. palmata	1			20.8348	-78.9867	Rojo CIEC	Claudia	Adrián
42977	574	Colony	A. palmata	1			20.8346	-78.9867	Rojo CIEC	Claudia	Adrián
42977	575	Colony	A. palmata	1			20.8346	-78.9867	Rojo CIEC	Claudia	Adrián
42977	576	Colony	A. palmata	1			20.8346	-78.9867	Rojo CIEC	Claudia	Adrián
42977	577	Colony	A. palmata	1			20.8346	-78.9867	Rojo CIEC	Claudia	Adrián
42977	578	Colony	A. palmata	1			20.8345	-78.9867	Rojo CIEC	Claudia	Adrián
42977	579	Colony	A. palmata	1			20.8345	-78.9867	Rojo CIEC	Claudia	Adrián
42977	580	Colony	A. palmata	1			20.8345	-78.9867	Rojo CIEC	Claudia	Adrián
42977	581	Colony	A. palmata	1			20.8345	-78.9868	Rojo CIEC	Claudia	Adrián
42977	582	Colony	A. palmata	1			20.8344	-78.9868	Rojo CIEC	Claudia	Adrián
42977	583	Colony	A. palmata	1			20.8344	-78.9868	Rojo CIEC	Claudia	Adrián
42977	584	Patch	A. palmata		14		20.8344	-78.9868	Rojo CIEC	Claudia	Adrián
42977	585	Patch	A. palmata		14		20.8344	-78.9868	Rojo CIEC	Claudia	Adrián
42977	586	Patch	A. palmata		14		20.8344	-78.9868	Rojo CIEC	Claudia	Adrián
42977	587	Patch	A. palmata		14		20.8344	-78.9868	Rojo CIEC	Claudia	Adrián
42977	588	Patch	A. palmata		14		20.8344	-78.9868	Rojo CIEC	Claudia	Adrián
42977	589	Patch	A. palmata		14		20.8344	-78.9868	Rojo CIEC	Claudia	Adrián
42977	590	Colony	A. palmata	1			20.8344	-78.9868	Rojo CIEC	Claudia	Adrián
42977	591	Colony	A. palmata	1			20.8344	-78.9869	Rojo CIEC	Claudia	Adrián
42977	592	Colony	A. palmata	1			20.8344	-78.9869	Rojo CIEC	Claudia	Adrián
42977	593	Colony	A. palmata	1			20.8341	-78.9871	Rojo CIEC	Claudia	Adrián
42977	594	Colony	A. palmata	1			20.8341	-78.9871	Rojo CIEC	Claudia	Adrián
42977	595	Patch	A. palmata		15		20.8341	-78.9871	Rojo CIEC	Claudia	Adrián
42977	596	Patch	A. palmata		15		20.8341	-78.9871	Rojo CIEC	Claudia	Adrián
42977	597	Patch	A. palmata		15		20.834	-78.9871	Rojo CIEC	Claudia	Adrián
42977	598	Patch	A. palmata		15		20.8341	-78.9871	Rojo CIEC	Claudia	Adrián
42977	599	Colony	A. palmata	1			20.8341	-78.9871	Rojo CIEC	Claudia	Adrián
42977	600	Colony	A. palmata	1			20.834	-78.9871	Rojo CIEC	Claudia	Adrián
42977	601	Colony	A. palmata	1			20.8341	-78.9871	Rojo CIEC	Claudia	Adrián
42977	602	Colony	A. palmata	1			20.8338	-78.9873	Rojo CIEC	Claudia	Adrián
42977	603	Colony	A. palmata	1			20.8338	-78.9873	Rojo CIEC	Claudia	Adrián
42977	604	Colony	A. palmata	1			20.8338	-78.9874	Rojo CIEC	Claudia	Adrián
42977	605	Colony	A. palmata	1			20.8338	-78.9874	Rojo CIEC	Claudia	Adrián
42977	606	Colony	A. palmata	1			20.8338	-78.9874	Rojo CIEC	Claudia	Adrián
42977	607	Colony	A. palmata	1			20.8338	-78.9874	Rojo CIEC	Claudia	Adrián
42977	608	Colony	A. palmata	1			20.8338	-78.9875	Rojo CIEC	Claudia	Adrián
42977	609	Colony	A. palmata	1			20.8338	-78.9874	Rojo CIEC	Claudia	Adrián
42977	610	Fragments	A. palmata			14	20.8337	-78.9875	Rojo CIEC	Claudia	Adrián
42977	611	Colony	A. palmata	1			20.8338	-78.9875	Rojo CIEC	Claudia	Adrián
42977	612	Colony	A. palmata	1			20.8337	-78.9875	Rojo CIEC	Claudia	Adrián
42977	613	Colony	A. palmata	1			20.8337	-78.9875	Rojo CIEC	Claudia	Adrián
42977	614	Colony	A. palmata	1			20.8338	-78.9875	Rojo CIEC	Claudia	Adrián
42977	615	Colony	A. palmata	1			20.8339	-78.9875	Rojo CIEC	Claudia	Adrián
42977	616	Colony	A. palmata	1			20.8337	-78.9877	Rojo CIEC	Claudia	Adrián
42977	617	Colony	A. palmata	1			20.8337	-78.9877	Rojo CIEC	Claudia	Adrián
42977	618	Colony	A. palmata	1			20.8337	-78.9878	Rojo CIEC	Claudia	Adrián
42977	619	Colony	A. palmata	1			20.8337	-78.9878	Rojo CIEC	Claudia	Adrián
42977	620	Colony	A. palmata	1			20.8337	-78.9878	Rojo CIEC	Claudia	Adrián
42977	621	Colony	A. palmata	1			20.8337	-78.9878	Rojo CIEC	Claudia	Adrián
42977	622	Patch	A. palmata		16		20.8337	-78.9878	Rojo CIEC	Claudia	Adrián
42977	623	Patch	A. palmata		16		20.8336	-78.9879	Rojo CIEC	Claudia	Adrián
42977	624	Patch	A. palmata		16		20.8337	-78.988	Rojo CIEC	Claudia	Adrián
30/08/2017	394	Colony	A. palmata	1			20.8316	-78.9753	OFY	Fabián	Tamara
30/08/2017	395	Colony	A. palmata	1			20.8314	-78.9782	OFY	Fabián	Tamara
30/08/2017	396	Colony	A. palmata	1			20.8314	-78.9782	OFY	Fabián	Tamara
30/08/2017	397	Colony	A. palmata	1			20.8313	-78.9781	OFY	Fabián	Tamara
30/08/2017	398	Patch	A. palmata		17		20.8314	-78.9781	OFY	Fabián	Tamara
30/08/2017	399	Patch	A. palmata		17		20.8313	-78.9781	OFY	Fabián	Tamara
30/08/2017	400	Colony	A. palmata	1			20.8313	-78.9782	OFY	Fabián	Tamara
30/08/2017	401	Colony	A. palmata	1			20.8312	-78.9782	OFY	Fabián	Tamara
30/08/2017	402	Colony	A. palmata	1			20.8312	-78.9782	OFY	Fabián	Tamara
30/08/2017	403	Colony	A. palmata	1			20.8312	-78.9782	OFY	Fabián	Tamara
30/08/2017	404	A. cervicornis	A. cervicornis	1			20.8312	-78.9782	OFY	Fabián	Tamara
30/08/2017	405	Colony	A. palmata	1			20.8313	-78.9782	OFY	Fabián	Tamara
30/08/2017	406	Colony	A. palmata	1			20.8312	-78.9782	OFY	Fabián	Tamara
30/08/2017	407	Colony	A. palmata	1			20.8312	-78.9782	OFY	Fabián	Tamara
30/08/2017	408	Colony	A. palmata	1			20.8313	-78.9782	OFY	Fabián	Tamara
30/08/2017	409	Fragments	A. palmata			9	20.8313	-78.9781	OFY	Fabián	Tamara
30/08/2017	410	Patch	A. palmata		18		20.8313	-78.9781	OFY	Fabián	Tamara
30/08/2017	411	Fragments	A. palmata			7	20.8313	-78.978	OFY	Fabián	Tamara
30/08/2017	412	Patch	A. palmata		19		20.8313	-78.9781	OFY	Fabián	Tamara
30/08/2017	413	Patch	A. palmata		19		20.8313	-78.978	OFY	Fabián	Tamara
30/08/2017	414	Patch	A. palmata		19		20.8313	-78.978	OFY	Fabián	Tamara
30/08/2017	415	Patch	A. palmata		19		20.8313	-78.978	OFY	Fabián	Tamara
30/08/2017	416	Colony	A. palmata	1			20.8313	-78.978	OFY	Fabián	Tamara
30/08/2017	417	Colony	A. palmata	1			20.8313	-78.978	OFY	Fabián	Tamara
30/08/2017	418	Colony	A. palmata	1			20.8313	-78.978	OFY	Fabián	Tamara
30/08/2017	419	Colony	A. palmata	1			20.8313	-78.9779	OFY	Fabián	Tamara
30/08/2017	420	Patch	A. palmata		20		20.8313	-78.978	OFY	Fabián	Tamara
30/08/2017	421	Patch	A. palmata		20		20.8313	-78.9779	OFY	Fabián	Tamara
30/08/2017	422	Patch	A. palmata		20		20.8313	-78.9779	OFY	Fabián	Tamara
30/08/2017	423	Patch	A. palmata		20		20.8313	-78.9779	OFY	Fabián	Tamara
30/08/2017	424	Patch	A. palmata		20		20.8312	-78.9779	OFY	Fabián	Tamara
30/08/2017	425	Patch	A. palmata		21		20.8312	-78.9779	OFY	Fabián	Tamara
30/08/2017	426	Patch	A. palmata		21		20.8313	-78.9779	OFY	Fabián	Tamara
30/08/2017	427	Patch	A. palmata		21		20.8313	-78.9778	OFY	Fabián	Tamara
30/08/2017	428	Patch	A. palmata		21		20.8313	-78.9778	OFY	Fabián	Tamara
30/08/2017	429	Patch	A. palmata		21		20.8314	-78.9778	OFY	Fabián	Tamara
30/08/2017	430	Patch	A. palmata		21		20.8314	-78.9778	OFY	Fabián	Tamara
30/08/2017	431	Patch	A. palmata		21		20.8314	-78.9778	OFY	Fabián	Tamara
30/08/2017	432	Patch	A. palmata		21		20.8313	-78.9778	OFY	Fabián	Tamara
30/08/2017	433	Patch	A. palmata		21		20.8313	-78.9778	OFY	Fabián	Tamara
30/08/2017	434	Patch	A. palmata		21		20.8313	-78.9778	OFY	Fabián	Tamara
30/08/2017	435	Patch	A. palmata		21		20.8313	-78.9777	OFY	Fabián	Tamara
30/08/2017	436	Patch	A. palmata		21		20.8312	-78.9778	OFY	Fabián	Tamara
30/08/2017	437	Patch	A. palmata		21		20.8311	-78.9778	OFY	Fabián	Tamara
30/08/2017	438	Patch	A. palmata		21		20.8312	-78.9778	OFY	Fabián	Tamara
30/08/2017	439	Patch	A. palmata		21		20.8312	-78.9779	OFY	Fabián	Tamara
30/08/2017	440	Colony	A. palmata	1			20.8312	-78.9777	OFY	Fabián	Tamara
30/08/2017	441	Colony	A. palmata	1			20.8312	-78.9776	OFY	Fabián	Tamara
30/08/2017	442	Fragments	A. palmata			6	20.8312	-78.9776	OFY	Fabián	Tamara
30/08/2017	443	Colony	A. palmata	1			20.8313	-78.9776	OFY	Fabián	Tamara
30/08/2017	444	Colony	A. palmata	1			20.8312	-78.9775	OFY	Fabián	Tamara
30/08/2017	445	Colony	A. palmata	1			20.8313	-78.9775	OFY	Fabián	Tamara
30/08/2017	446	Colony	A. palmata	1			20.8313	-78.9774	OFY	Fabián	Tamara
30/08/2017	447	Colony	A. palmata	1			20.8313	-78.9774	OFY	Fabián	Tamara
30/08/2017	448	Colony	A. palmata	1			20.8312	-78.9774	OFY	Fabián	Tamara
30/08/2017	449	Colony	A. palmata	1			20.8312	-78.9774	OFY	Fabián	Tamara
30/08/2017	450	Colony	A. palmata	1			20.8313	-78.9773	OFY	Fabián	Tamara
30/08/2017	451	Colony	A. palmata	1			20.8313	-78.9773	OFY	Fabián	Tamara
30/08/2017	452	Colony	A. palmata	1			20.8312	-78.9773	OFY	Fabián	Tamara
30/08/2017	453	Colony	A. palmata	1			20.8313	-78.9774	OFY	Fabián	Tamara
30/08/2017	454	Colony	A. palmata	1			20.8313	-78.9769	OFY	Fabián	Tamara
30/08/2017	455	Colony	A. palmata	1			20.8313	-78.9768	OFY	Fabián	Tamara
30/08/2017	456	Colony	A. palmata	1			20.8313	-78.9768	OFY	Fabián	Tamara
30/08/2017	457	Colony	A. palmata	1			20.8313	-78.9767	OFY	Fabián	Tamara
30/08/2017	458	Colony	A. palmata	1			20.8313	-78.9766	OFY	Fabián	Tamara
30/08/2017	459	Colony	A. palmata	1			20.8314	-78.9766	OFY	Fabián	Tamara
30/08/2017	460	Colony	A. palmata	1			20.8318	-78.9762	OFY	Fabián	Tamara
30/08/2017	461	Colony	A. palmata	1			20.8319	-78.9762	OFY	Fabián	Tamara
30/08/2017	462	Colony	A. palmata	1			20.8319	-78.9761	OFY	Fabián	Tamara
30/08/2017	463	Colony	A. palmata	1			20.8319	-78.9761	OFY	Fabián	Tamara
30/08/2017	464	Colony	A. palmata	1			20.8319	-78.9761	OFY	Fabián	Tamara
30/08/2017	466	Colony	A. palmata	1			20.8312	-78.9782	OFY	Fabián	Tamara
30/08/2017	467	Colony	A. palmata	1			20.8312	-78.9782	OFY	Fabián	Tamara
30/08/2017	468	Colony	A. palmata	1			20.831	-78.9783	OFY	Fabián	Tamara
30/08/2017	469	Colony	A. palmata	1			20.831	-78.9783	OFY	Fabián	Tamara
30/08/2017	470	Colony	A. palmata	1			20.8309	-78.9782	OFY	Fabián	Tamara
30/08/2017	471	Colony	A. palmata	1			20.831	-78.9782	OFY	Fabián	Tamara
30/08/2017	472	Colony	A. palmata	1			20.831	-78.9782	OFY	Fabián	Tamara
30/08/2017	473	Colony	A. palmata	1			20.831	-78.9782	OFY	Fabián	Tamara
30/08/2017	474	Colony	A. palmata	1			20.831	-78.9782	OFY	Fabián	Tamara
30/08/2017	475	Colony	A. palmata	1			20.831	-78.9782	OFY	Fabián	Tamara
30/08/2017	476	Colony	A. palmata	1			20.831	-78.9782	OFY	Fabián	Tamara
30/08/2017	477	Colony	A. palmata	1			20.8311	-78.9782	OFY	Fabián	Tamara
30/08/2017	478	Colony	A. palmata	1			20.8311	-78.9782	OFY	Fabián	Tamara
30/08/2017	479	Colony	A. palmata	1			20.831	-78.9782	OFY	Fabián	Tamara
30/08/2017	480	Colony	A. palmata	1			20.8311	-78.9781	OFY	Fabián	Tamara
30/08/2017	481	Colony	A. palmata	1			20.8311	-78.9781	OFY	Fabián	Tamara
30/08/2017	482	Colony	A. palmata	1			20.8311	-78.9781	OFY	Fabián	Tamara
30/08/2017	483	Colony	A. palmata	1			20.8311	-78.9782	OFY	Fabián	Tamara
30/08/2017	484	Colony	A. palmata	1			20.8312	-78.9782	OFY	Fabián	Tamara
30/08/2017	485	Colony	A. palmata	1			20.8312	-78.9781	OFY	Fabián	Tamara
30/08/2017	486	Colony	A. palmata	1			20.8312	-78.9781	OFY	Fabián	Tamara
30/08/2017	487	Colony	A. palmata	1			20.8312	-78.9781	OFY	Fabián	Tamara
30/08/2017	488	Colony	A. palmata	1			20.8312	-78.9781	OFY	Fabián	Tamara
30/08/2017	489	Fragments	A. palmata			5	20.8312	-78.9781	OFY	Fabián	Tamara
30/08/2017	490	Fragments	A. palmata			7	20.8311	-78.9781	OFY	Fabián	Tamara
30/08/2017	491	Colony	A. palmata	1			20.8311	-78.9781	OFY	Fabián	Tamara
30/08/2017	492	Colony	A. palmata	1			20.8311	-78.9781	OFY	Fabián	Tamara
30/08/2017	493	Colony	A. palmata	1			20.831	-78.9781	OFY	Fabián	Tamara
30/08/2017	494	Colony	A. palmata	1			20.831	-78.9781	OFY	Fabián	Tamara
30/08/2017	495	Colony	A. palmata	1			20.831	-78.9782	OFY	Fabián	Tamara
30/08/2017	496	Colony	A. palmata	1			20.831	-78.9782	OFY	Fabián	Tamara
30/08/2017	497	Colony	A. palmata	1			20.831	-78.9781	OFY	Fabián	Tamara
30/08/2017	498	Colony	A. palmata	1			20.831	-78.978	OFY	Fabián	Tamara
30/08/2017	499	Colony	A. palmata	1			20.8311	-78.978	OFY	Fabián	Tamara
30/08/2017	500	Colony	A. palmata	1			20.8312	-78.978	OFY	Fabián	Tamara
30/08/2017	501	Colony	A. palmata	1			20.8312	-78.978	OFY	Fabián	Tamara
30/08/2017	502	Colony	A. palmata	1			20.8312	-78.978	OFY	Fabián	Tamara
30/08/2017	503	Colony	A. palmata	1			20.8312	-78.978	OFY	Fabián	Tamara
30/08/2017	504	Colony	A. palmata	1			20.8312	-78.978	OFY	Fabián	Tamara
30/08/2017	505	Colony	A. palmata	1			20.8313	-78.978	OFY	Fabián	Tamara
30/08/2017	506	Colony	A. palmata	1			20.8313	-78.978	OFY	Fabián	Tamara
30/08/2017	507	Colony	A. palmata	1			20.8312	-78.9779	OFY	Fabián	Tamara
30/08/2017	508	Colony	A. palmata	1			20.8312	-78.9779	OFY	Fabián	Tamara
30/08/2017	509	Colony	A. palmata	1			20.8312	-78.9779	OFY	Fabián	Tamara
30/08/2017	510	Colony	A. palmata	1			20.8312	-78.9779	OFY	Fabián	Tamara
30/08/2017	511	Patch	A. palmata		22		20.8312	-78.9779	OFY	Fabián	Tamara
30/08/2017	512	Patch	A. palmata		22		20.8311	-78.9779	OFY	Fabián	Tamara
30/08/2017	513	Patch	A. palmata		22		20.8311	-78.978	OFY	Fabián	Tamara
30/08/2017	514	Patch	A. palmata		22		20.8311	-78.978	OFY	Fabián	Tamara
30/08/2017	515	Patch	A. palmata		22		20.831	-78.978	OFY	Fabián	Tamara
30/08/2017	516	Patch	A. palmata		22		20.8309	-78.978	OFY	Fabián	Tamara
30/08/2017	517	Patch	A. palmata		22		20.8309	-78.978	OFY	Fabián	Tamara
30/08/2017	518	Patch	A. palmata		22		20.8308	-78.9781	OFY	Fabián	Tamara
30/08/2017	519	Patch	A. palmata		22		20.8308	-78.978	OFY	Fabián	Tamara
30/08/2017	520	Colony	A. palmata	1			20.8307	-78.9779	OFY	Fabián	Tamara
30/08/2017	521	Colony	A. palmata	1			20.8307	-78.9779	OFY	Fabián	Tamara
30/08/2017	522	Patch	A. palmata		23		20.8308	-78.978	OFY	Fabián	Tamara
30/08/2017	523	Patch	A. palmata		23		20.8309	-78.9779	OFY	Fabián	Tamara
30/08/2017	524	Patch	A. palmata		23		20.8309	-78.978	OFY	Fabián	Tamara
30/08/2017	525	Patch	A. palmata		23		20.8309	-78.9779	OFY	Fabián	Tamara
30/08/2017	526	Fragments	A. palmata			25	20.8309	-78.9779	OFY	Fabián	Tamara
30/08/2017	527	Patch	A. palmata		24		20.831	-78.9779	OFY	Fabián	Tamara
30/08/2017	528	Patch	A. palmata		24		20.831	-78.9779	OFY	Fabián	Tamara
30/08/2017	529	Patch	A. palmata		24		20.8311	-78.9778	OFY	Fabián	Tamara
30/08/2017	530	Patch	A. palmata		24		20.8311	-78.9778	OFY	Fabián	Tamara
30/08/2017	531	Patch	A. palmata		24		20.8311	-78.9777	OFY	Fabián	Tamara
30/08/2017	532	Colony	A. palmata	1			20.8312	-78.9776	OFY	Fabián	Tamara
30/08/2017	533	Patch	A. palmata		25		20.8311	-78.9776	OFY	Fabián	Tamara
30/08/2017	534	Patch	A. palmata		25		20.8311	-78.9775	OFY	Fabián	Tamara
30/08/2017	535	Patch	A. palmata		25		20.831	-78.9776	OFY	Fabián	Tamara
30/08/2017	536	Patch	A. palmata		25		20.8311	-78.9776	OFY	Fabián	Tamara
30/08/2017	537	Colony	A. palmata	1			20.8311	-78.9773	OFY	Fabián	Tamara
30/08/2017	538	Colony	A. palmata	1			20.8309	-78.9769	OFY	Fabián	Tamara
30/08/2017	539	Colony	A. palmata	1			20.831	-78.9767	OFY	Fabián	Tamara
31/08/2017	730	Colony	A. palmata	1			20.8461	-79.0183	2	Leslie	Maysel
31/08/2017	731	Colony	A. palmata	1			20.8462	-79.0183	2	Leslie	Maysel
31/08/2017	732	Colony	A. palmata	1		1	20.8464	-79.0185	2	Leslie	Maysel
31/08/2017	733	Colony	A. palmata	1			20.8464	-79.0185	2	Leslie	Maysel
31/08/2017	734	Colony	A. palmata	1			20.8464	-79.0185	2	Leslie	Maysel
31/08/2017	735	Colony	A. palmata	1			20.8464	-79.0185	2	Leslie	Maysel
31/08/2017	736	Colony	A. palmata	1			20.8462	-79.0185	2	Leslie	Maysel
31/08/2017	737	Colony	A. palmata	1		2	20.8462	-79.0184	2	Leslie	Maysel
31/08/2017	738	Fragments	A. palmata	1		6	20.8462	-79.0184	2	Leslie	Maysel
31/08/2017	739	Colony	A. palmata	1			20.8461	-79.0183	2	Leslie	Maysel
31/08/2017	740	Colony	A. palmata	1			20.8462	-79.0183	2	Leslie	Maysel
31/08/2017	741	Colony	A. palmata	1			20.8462	-79.0184	2	Leslie	Maysel
31/08/2017	742	Colony	A. palmata	1			20.846	-79.0183	2	Leslie	Maysel
31/08/2017	743	A. prolifera	A. prolifera	1			20.8461	-79.0184	2	Leslie	Maysel
31/08/2017	744	Colony	A. palmata	1			20.8461	-79.0184	2	Leslie	Maysel
31/08/2017	745	Colony	A. palmata	1			20.8461	-79.0185	2	Leslie	Maysel
31/08/2017	746	Colony	A. palmata	1			20.8461	-79.0185	2	Leslie	Maysel
31/08/2017	747	Colony	A. palmata	1			20.8461	-79.0185	2	Leslie	Maysel
31/08/2017	748	Colony	A. palmata	1			20.8462	-79.0184	2	Leslie	Maysel
31/08/2017	749	Colony	A. palmata			2	20.8463	-79.0185	2	Leslie	Maysel
31/08/2017	750	Colony	A. palmata	1			20.8463	-79.0185	2	Leslie	Maysel
31/08/2017	751	Colony	A. palmata	1			20.8463	-79.0186	2	Leslie	Maysel
31/08/2017	752	Colony	A. palmata	1		1	20.8462	-79.0186	2	Leslie	Maysel
31/08/2017	753	Colony	A. palmata	1		1	20.8461	-79.0186	2	Leslie	Maysel
31/08/2017	754	Colony	A. palmata	1			20.8462	-79.0187	2	Leslie	Maysel
31/08/2017	755	Colony	A. palmata	1			20.8463	-79.0188	2	Leslie	Maysel
31/08/2017	756	Colony	A. palmata	1			20.846	-79.0189	2	Leslie	Maysel
31/08/2017	757	Colony	A. palmata	1			20.8461	-79.019	2	Leslie	Maysel
31/08/2017	758	Colony	A. palmata	1			20.8462	-79.019	2	Leslie	Maysel
31/08/2017	759	Colony	A. palmata	1			20.8462	-79.019	2	Leslie	Maysel
31/08/2017	760	Colony	A. palmata			2	20.8462	-79.019	2	Leslie	Maysel
31/08/2017	761	Colony	A. palmata	1		4	20.8463	-79.019	2	Leslie	Maysel
31/08/2017	762	Patch	A. palmata		26		20.8463	-79.019	2	Leslie	Maysel
31/08/2017	763	Patch	A. palmata		26	5	20.8463	-79.019	2	Leslie	Maysel
31/08/2017	764	Patch	A. palmata		26		20.8463	-79.0189	2	Leslie	Maysel
31/08/2017	765	Patch	A. palmata		26		20.8463	-79.0189	2	Leslie	Maysel
31/08/2017	766	Colony	A. palmata	1			20.8462	-79.019	2	Leslie	Maysel
31/08/2017	767	Colony	A. palmata	1		1	20.8463	-79.019	2	Leslie	Maysel
31/08/2017	768	Colony	A. palmata	1			20.8464	-79.019	2	Leslie	Maysel
31/08/2017	769	Colony	A. palmata	1		6	20.8464	-79.019	2	Leslie	Maysel
31/08/2017	770	Colony	A. palmata	1		1	20.8464	-79.019	2	Leslie	Maysel
31/08/2017	771	Colony	A. palmata	1		3	20.8464	-79.019	2	Leslie	Maysel
31/08/2017	772	Colony	A. palmata	1			20.8464	-79.019	2	Leslie	Maysel
31/08/2017	773	Patch	A. palmata		27		20.8464	-79.019	2	Leslie	Maysel
31/08/2017	774	Patch	A. palmata		27		20.8464	-79.0189	2	Leslie	Maysel
31/08/2017	775	Patch	A. palmata		27		20.8464	-79.0189	2	Leslie	Maysel
31/08/2017	776	Fragments	A. palmata			3	20.8463	-79.019	2	Leslie	Maysel
31/08/2017	777	Colony	A. palmata	1		7	20.8463	-79.019	2	Leslie	Maysel
31/08/2017	778	Colony	A. palmata	1			20.8463	-79.0191	2	Leslie	Maysel
31/08/2017	779	Colony	A. palmata	1		1	20.8463	-79.0191	2	Leslie	Maysel
31/08/2017	780	Colony	A. palmata	1			20.8463	-79.0191	2	Leslie	Maysel
31/08/2017	781	Colony	A. palmata	1			20.8464	-79.0192	2	Leslie	Maysel
31/08/2017	782	Colony	A. palmata	2			20.8463	-79.0192	2	Leslie	Maysel
31/08/2017	783	Colony	A. palmata	1			20.8462	-79.0191	2	Leslie	Maysel
31/08/2017	784	Colony	A. palmata	1			20.8462	-79.0191	2	Leslie	Maysel
31/08/2017	785	Colony	A. palmata	1			20.8462	-79.0191	2	Leslie	Maysel
31/08/2017	786	A. prolifera	A. prolifera	1			20.8462	-79.0191	2	Leslie	Maysel
31/08/2017	787	A. prolifera	A. prolifera	1			20.8461	-79.0191	2	Leslie	Maysel
31/08/2017	788	Colony	A. palmata	1			20.8461	-79.0192	2	Leslie	Maysel
31/08/2017	789	Colony	A. palmata	1			20.8461	-79.0192	2	Leslie	Maysel
31/08/2017	790	Colony	A. palmata	1			20.8461	-79.0192	2	Leslie	Maysel
31/08/2017	791	Colony	A. palmata	1			20.8461	-79.0192	2	Leslie	Maysel
31/08/2017	792	Colony	A. palmata	1		1	20.8461	-79.0192	2	Leslie	Maysel
31/08/2017	793	Colony	A. palmata	4			20.8461	-79.0193	2	Leslie	Maysel
31/08/2017	794	Colony	A. palmata	1			20.8462	-79.0193	2	Leslie	Maysel
31/08/2017	795	Colony	A. palmata	1			20.8462	-79.0194	2	Leslie	Maysel
31/08/2017	796	Colony	A. palmata	3			20.8462	-79.0194	2	Leslie	Maysel
31/08/2017	797	Colony	A. palmata	1		7	20.8463	-79.0194	2	Leslie	Maysel
31/08/2017	798	Colony	A. palmata	2			20.8463	-79.0194	2	Leslie	Maysel
31/08/2017	799	Colony	A. palmata	1			20.8463	-79.0194	2	Leslie	Maysel
31/08/2017	800	Colony	A. palmata	1			20.8463	-79.0194	2	Leslie	Maysel
31/08/2017	801	Colony	A. palmata	1			20.8463	-79.0194	2	Leslie	Maysel
31/08/2017	802	Colony	A. palmata	1			20.8464	-79.0194	2	Leslie	Maysel
31/08/2017	803	Colony	A. palmata	1			20.8463	-79.0194	2	Leslie	Maysel
31/08/2017	804	Colony	A. palmata	1			20.8463	-79.0194	2	Leslie	Maysel
31/08/2017	805	Colony	A. palmata	1			20.8463	-79.0194	2	Leslie	Maysel
31/08/2017	806	Colony	A. palmata	1			20.8462	-79.0195	2	Leslie	Maysel
31/08/2017	807	Colony	A. palmata	1			20.8462	-79.0195	2	Leslie	Maysel
31/08/2017	808	Colony	A. palmata	1			20.8462	-79.0195	2	Leslie	Maysel
31/08/2017	809	Colony	A. palmata	1			20.8463	-79.0195	2	Leslie	Maysel
31/08/2017	810	Colony	A. palmata	1			20.8463	-79.0195	2	Leslie	Maysel
31/08/2017	811	Colony	A. palmata	1			20.8463	-79.0195	2	Leslie	Maysel
31/08/2017	812	Colony	A. palmata	1			20.8463	-79.0195	2	Leslie	Maysel
31/08/2017	813	Colony	A. palmata	1			20.8463	-79.0195	2	Leslie	Maysel
31/08/2017	814	Colony	A. palmata	1			20.8463	-79.0196	2	Leslie	Maysel
31/08/2017	815	Colony	A. palmata	1			20.8463	-79.0195	2	Leslie	Maysel
31/08/2017	816	Patch	A. palmata		28		20.8462	-79.0196	2	Leslie	Maysel
31/08/2017	817	Patch	A. palmata		28		20.8462	-79.0195	2	Leslie	Maysel
31/08/2017	818	Patch	A. palmata		28		20.8462	-79.0195	2	Leslie	Maysel
31/08/2017	819	Colony	A. palmata	1			20.8464	-79.0199	2	Leslie	Maysel
31/08/2017	820	Colony	A. palmata	1			20.8465	-79.0199	2	Leslie	Maysel
31/08/2017	821	Colony	A. palmata	1			20.8464	-79.0199	2	Leslie	Maysel
31/08/2017	822	Colony	A. palmata	1			20.8464	-79.02	2	Leslie	Maysel
31/08/2017	823	Colony	A. palmata	1			20.8463	-79.0199	2	Leslie	Maysel
31/08/2017	824	Colony	A. palmata	1			20.8463	-79.0199	2	Leslie	Maysel
31/08/2017	825	Colony	A. palmata	1			20.8463	-79.0199	2	Leslie	Maysel
31/08/2017	826	Colony	A. palmata	1			20.8463	-79.02	2	Leslie	Maysel
31/08/2017	827	Colony	A. palmata	1			20.8463	-79.0199	2	Leslie	Maysel
31/08/2017	828	Colony	A. palmata	1			20.8463	-79.02	2	Leslie	Maysel
31/08/2017	829	Colony	A. palmata	1			20.8463	-79.02	2	Leslie	Maysel
31/08/2017	830	Colony	A. palmata	1			20.8463	-79.02	2	Leslie	Maysel
31/08/2017	831	Colony	A. palmata	1			20.8463	-79.02	2	Leslie	Maysel
31/08/2017	832	Colony	A. palmata	1			20.8463	-79.02	2	Leslie	Maysel
31/08/2017	833	Colony	A. palmata	1			20.8463	-79.02	2	Leslie	Maysel
31/08/2017	834	Colony	A. palmata	1		1	20.8463	-79.02	2	Leslie	Maysel
31/08/2017	835	Colony	A. palmata	1		5	20.8462	-79.02	2	Leslie	Maysel
31/08/2017	836	Colony	A. palmata	1			20.8463	-79.02	2	Leslie	Maysel
31/08/2017	837	Patch	A. palmata		29		20.8464	-79.0202	2	Leslie	Maysel
31/08/2017	838	Patch	A. palmata		29		20.8464	-79.0202	2	Leslie	Maysel
31/08/2017	839	Patch	A. palmata		29		20.8464	-79.0202	2	Leslie	Maysel
31/08/2017	840	Colony	A. palmata	1		1	20.8465	-79.0202	2	Leslie	Maysel
31/08/2017	841	Colony	A. palmata	1			20.8464	-79.0202	2	Leslie	Maysel
31/08/2017	842	Colony	A. palmata	1			20.8464	-79.0202	2	Leslie	Maysel
31/08/2017	843	Colony	A. palmata	1			20.8464	-79.0202	2	Leslie	Maysel
31/08/2017	844	Colony	A. palmata	1			20.8464	-79.0202	2	Leslie	Maysel
31/08/2017	845	Fragments	A. palmata			12	20.8463	-79.0202	2	Leslie	Maysel
31/08/2017	846	Colony	A. palmata	1			20.8463	-79.0202	2	Leslie	Maysel
31/08/2017	847	Colony	A. palmata	1			20.8466	-79.0204	2	Leslie	Maysel
31/08/2017	848	Colony	A. palmata	1			20.8515	-79.0324	2	Leslie	Maysel
31/08/2017	849	Colony	A. palmata	1			20.8514	-79.0325	2	Leslie	Maysel
31/08/2017	850	Colony	A. palmata	1			20.8516	-79.0325	2	Leslie	Maysel
31/08/2017	851	Colony	A. palmata	1			20.8516	-79.0325	2	Leslie	Maysel
31/08/2017	852	Colony	A. palmata	1			20.8516	-79.0325	2	Leslie	Maysel
31/08/2017	853	Colony	A. palmata	1			20.8515	-79.0327	2	Leslie	Maysel
31/08/2017	854	Colony	A. palmata	1			20.8516	-79.0329	2	Leslie	Maysel
31/08/2017	855	Colony	A. palmata	1			20.8517	-79.0329	2	Leslie	Maysel
31/08/2017	856	Colony	A. palmata	1			20.8517	-79.0328	2	Leslie	Maysel
31/08/2017	857	Colony	A. palmata	1			20.8517	-79.033	2	Leslie	Maysel
31/08/2017	858	Colony	A. palmata	1			20.8519	-79.0336	2	Leslie	Maysel
31/08/2017	859	Colony	A. palmata	1			20.852	-79.0336	2	Leslie	Maysel
31/08/2017	860	Colony	A. palmata	1			20.8521	-79.0336	2	Leslie	Maysel
31/08/2017	861	Colony	A. palmata	1			20.8521	-79.0337	2	Leslie	Maysel
31/08/2017	862	Colony	A. palmata	1			20.8521	-79.0337	2	Leslie	Maysel
31/08/2017	863	Colony	A. palmata	1			20.852	-79.034	2	Leslie	Maysel
31/08/2017	864	Colony	A. palmata	1			20.8522	-79.0342	2	Leslie	Maysel
31/08/2017	542	Colony	A. palmata	1			20.838	-78.9932	OFY	Fabián	Tamara
31/08/2017	543	Colony	A. palmata	1			20.8382	-78.9931	OFY	Fabián	Tamara
31/08/2017	544	Colony	A. palmata	1			20.8381	-78.993	OFY	Fabián	Tamara
31/08/2017	545	Colony	A. palmata	1			20.8382	-78.993	OFY	Fabián	Tamara
31/08/2017	546	Colony	A. palmata	1			20.8383	-78.9931	OFY	Fabián	Tamara
31/08/2017	547	Colony	A. palmata	1			20.8384	-78.9932	OFY	Fabián	Tamara
31/08/2017	548	Colony	A. palmata	1			20.8385	-78.9934	OFY	Fabián	Tamara
31/08/2017	549	Colony	A. palmata	1			20.8385	-78.9935	OFY	Fabián	Tamara
31/08/2017	550	Patch	A. palmata		30		20.8386	-78.9935	OFY	Fabián	Tamara
31/08/2017	551	Colony	A. palmata	1			20.8385	-78.9935	OFY	Fabián	Tamara
31/08/2017	552	Colony	A. palmata	1			20.8385	-78.9935	OFY	Fabián	Tamara
31/08/2017	553	Colony	A. palmata	1			20.8385	-78.9936	OFY	Fabián	Tamara
31/08/2017	554	Colony	A. palmata	1			20.8387	-78.9937	OFY	Fabián	Tamara
31/08/2017	555	Patch	A. palmata		31		20.8387	-78.9937	OFY	Fabián	Tamara
31/08/2017	556	Colony	A. palmata	1			20.8388	-78.9937	OFY	Fabián	Tamara
31/08/2017	557	Colony	A. palmata	1			20.8388	-78.9936	OFY	Fabián	Tamara
31/08/2017	558	Colony	A. palmata	1			20.8391	-78.9936	OFY	Fabián	Tamara
31/08/2017	559	Colony	A. palmata	1			20.8392	-78.9936	OFY	Fabián	Tamara
31/08/2017	560	Colony	A. palmata	1			20.8392	-78.9936	OFY	Fabián	Tamara
31/08/2017	561	Colony	A. palmata	1			20.8391	-78.9937	OFY	Fabián	Tamara
31/08/2017	562	Colony	A. palmata	1			20.8391	-78.9937	OFY	Fabián	Tamara
31/08/2017	563	Colony	A. palmata	1			20.8391	-78.9937	OFY	Fabián	Tamara
31/08/2017	564	Colony	A. palmata	1			20.8391	-78.9937	OFY	Fabián	Tamara
31/08/2017	565	Colony	A. palmata	1			20.839	-78.9937	OFY	Fabián	Tamara
31/08/2017	566	Colony	A. palmata	1			20.839	-78.9937	OFY	Fabián	Tamara
31/08/2017	567	Colony	A. palmata	1		9	20.839	-78.9938	OFY	Fabián	Tamara
31/08/2017	568	A. cervicornis	A. cervicornis	1			20.8392	-78.9937	OFY	Fabián	Tamara
31/08/2017	569	A. cervicornis	A. cervicornis	1			20.8392	-78.9937	OFY	Fabián	Tamara
31/08/2017	570	A. cervicornis	A. cervicornis	1			20.8391	-78.9938	OFY	Fabián	Tamara
31/08/2017	571	A. cervicornis	A. cervicornis	1			20.8391	-78.9938	OFY	Fabián	Tamara
31/08/2017	572	Colony	A. palmata	1			20.8392	-78.9938	OFY	Fabián	Tamara
31/08/2017	573	A. cervicornis	A. cervicornis	1			20.8391	-78.9939	OFY	Fabián	Tamara
31/08/2017	574	Colony	A. palmata	1			20.8391	-78.9939	OFY	Fabián	Tamara
31/08/2017	575	Colony	A. palmata	1			20.84	-78.9943	OFY	Fabián	Tamara
31/08/2017	576	Colony	A. palmata	1			20.8402	-78.9942	OFY	Fabián	Tamara
31/08/2017	579	Colony	A. palmata	1			20.8462	-79.0099	OFY	Fabián	Tamara
31/08/2017	580	Colony	A. palmata	1			20.8462	-79.01	OFY	Fabián	Tamara
31/08/2017	581	Colony	A. palmata			3	20.8461	-79.0103	OFY	Fabián	Tamara
31/08/2017	582	Colony	A. palmata	1			20.8461	-79.0102	OFY	Fabián	Tamara
31/08/2017	583	Colony	A. palmata	1			20.8462	-79.0103	OFY	Fabián	Tamara
31/08/2017	584	Colony	A. palmata	1			20.8461	-79.0103	OFY	Fabián	Tamara
31/08/2017	585	Colony	A. palmata	1			20.8461	-79.0104	OFY	Fabián	Tamara
31/08/2017	586	Colony	A. palmata	1			20.8461	-79.0106	OFY	Fabián	Tamara
31/08/2017	587	Colony	A. palmata	1			20.8462	-79.0108	OFY	Fabián	Tamara
31/08/2017	588	Colony	A. palmata	1			20.8462	-79.0108	OFY	Fabián	Tamara
31/08/2017	589	Colony	A. palmata	1			20.8463	-79.0108	OFY	Fabián	Tamara
31/08/2017	590	Colony	A. palmata	1			20.8463	-79.0108	OFY	Fabián	Tamara
31/08/2017	591	Colony	A. palmata	1			20.8463	-79.0107	OFY	Fabián	Tamara
31/08/2017	592	Colony	A. palmata	1			20.8463	-79.0107	OFY	Fabián	Tamara
31/08/2017	593	Colony	A. palmata	1			20.8464	-79.0109	OFY	Fabián	Tamara
31/08/2017	594	Colony	A. palmata	1			20.8464	-79.0109	OFY	Fabián	Tamara
31/08/2017	595	Colony	A. palmata	1			20.8464	-79.011	OFY	Fabián	Tamara
31/08/2017	596	Colony	A. palmata	1			20.8463	-79.0109	OFY	Fabián	Tamara
31/08/2017	597	Fragments	A. palmata			11	20.8463	-79.011	OFY	Fabián	Tamara
31/08/2017	598	Colony	A. palmata	1			20.8463	-79.0111	OFY	Fabián	Tamara
31/08/2017	599	Colony	A. palmata	1			20.8463	-79.0111	OFY	Fabián	Tamara
31/08/2017	600	Colony	A. palmata	1			20.8463	-79.0111	OFY	Fabián	Tamara
31/08/2017	601	Colony	A. palmata	1			20.847	-79.0169	OFY	Fabián	Tamara
31/08/2017	602	Colony	A. palmata	1			20.8469	-79.017	OFY	Fabián	Tamara
31/08/2017	603	Colony	A. palmata	1			20.8469	-79.017	OFY	Fabián	Tamara
31/08/2017	604	Colony	A. palmata	1			20.8468	-79.017	OFY	Fabián	Tamara
31/08/2017	606	Colony	A. palmata	1			20.8463	-79.0174	OFY	Fabián	Tamara
31/08/2017	607	Colony	A. palmata	1			20.8463	-79.0174	OFY	Fabián	Tamara
31/08/2017	608	Colony	A. palmata	1			20.8462	-79.0174	OFY	Fabián	Tamara
31/08/2017	609	Colony	A. palmata	1			20.8462	-79.0175	OFY	Fabián	Tamara
31/08/2017	610	Colony	A. palmata	1			20.8462	-79.0175	OFY	Fabián	Tamara
31/08/2017	611	Colony	A. palmata	1			20.8461	-79.0175	OFY	Fabián	Tamara
31/08/2017	612	Colony	A. palmata	1			20.8461	-79.0175	OFY	Fabián	Tamara
31/08/2017	613	Colony	A. palmata	1			20.8461	-79.0175	OFY	Fabián	Tamara
31/08/2017	614	Colony	A. palmata	1			20.8462	-79.0176	OFY	Fabián	Tamara
31/08/2017	615	Colony	A. palmata	1			20.8462	-79.0176	OFY	Fabián	Tamara
31/08/2017	616	Colony	A. palmata	1			20.8463	-79.0176	OFY	Fabián	Tamara
31/08/2017	617	Colony	A. palmata	1			20.8463	-79.0175	OFY	Fabián	Tamara
31/08/2017	618	Colony	A. palmata	1			20.8464	-79.0176	OFY	Fabián	Tamara
31/08/2017	619	Colony	A. palmata	1			20.8463	-79.0176	OFY	Fabián	Tamara
31/08/2017	620	Colony	A. palmata	1			20.8463	-79.0177	OFY	Fabián	Tamara
31/08/2017	621	Colony	A. palmata	1			20.8463	-79.0176	OFY	Fabián	Tamara
31/08/2017	622	Colony	A. palmata	1			20.8462	-79.0176	OFY	Fabián	Tamara
31/08/2017	623	Colony	A. palmata	1			20.8462	-79.0176	OFY	Fabián	Tamara
31/08/2017	624	Colony	A. palmata	1			20.8461	-79.0177	OFY	Fabián	Tamara
31/08/2017	625	Colony	A. palmata	1			20.8462	-79.0178	OFY	Fabián	Tamara
31/08/2017	626	Colony	A. palmata	1			20.8463	-79.0177	OFY	Fabián	Tamara
31/08/2017	627	Colony	A. palmata	1			20.8464	-79.0178	OFY	Fabián	Tamara
31/08/2017	628	Colony	A. palmata	1			20.8463	-79.0179	OFY	Fabián	Tamara
31/08/2017	629	Colony	A. palmata	1			20.8461	-79.0177	OFY	Fabián	Tamara
31/08/2017	630	Colony	A. palmata	1			20.8461	-79.0177	OFY	Fabián	Tamara
31/08/2017	631	Colony	A. palmata	1			20.8461	-79.0177	OFY	Fabián	Tamara
31/08/2017	632	Colony	A. palmata	1			20.8462	-79.0178	OFY	Fabián	Tamara
31/08/2017	633	Colony	A. palmata	1			20.8462	-79.018	OFY	Fabián	Tamara
31/08/2017	634	Colony	A. palmata	1			20.8463	-79.018	OFY	Fabián	Tamara
31/08/2017	635	Colony	A. palmata	1			20.8461	-79.018	OFY	Fabián	Tamara
31/08/2017	636	Colony	A. palmata	3			20.8461	-79.0179	OFY	Fabián	Tamara
31/08/2017	637	Colony	A. palmata	1			20.8461	-79.0179	OFY	Fabián	Tamara
31/08/2017	638	Colony	A. palmata	2			20.846	-79.0179	OFY	Fabián	Tamara
31/08/2017	639	Colony	A. palmata	1			20.846	-79.0179	OFY	Fabián	Tamara
31/08/2017	640	Colony	A. palmata	1			20.846	-79.0179	OFY	Fabián	Tamara
31/08/2017	641	Colony	A. palmata	2			20.846	-79.0179	OFY	Fabián	Tamara
31/08/2017	642	Colony	A. palmata	1			20.846	-79.0179	OFY	Fabián	Tamara
31/08/2017	643	Colony	A. palmata	1			20.8461	-79.0179	OFY	Fabián	Tamara
31/08/2017	644	Colony	A. palmata	1			20.8461	-79.0179	OFY	Fabián	Tamara
31/08/2017	645	Colony	A. palmata	1			20.8461	-79.018	OFY	Fabián	Tamara
31/08/2017	646	Colony	A. palmata	4			20.8461	-79.0179	OFY	Fabián	Tamara
31/08/2017	647	Colony	A. palmata	1			20.8462	-79.0181	OFY	Fabián	Tamara
31/08/2017	648	Colony	A. palmata	1			20.8461	-79.0181	OFY	Fabián	Tamara
31/08/2017	649	Colony	A. palmata	1			20.8461	-79.018	OFY	Fabián	Tamara
31/08/2017	650	Colony	A. palmata	1			20.8461	-79.018	OFY	Fabián	Tamara
31/08/2017	651	Colony	A. palmata	3			20.8461	-79.0181	OFY	Fabián	Tamara
31/08/2017	652	Colony	A. palmata	1			20.8461	-79.0181	OFY	Fabián	Tamara
31/08/2017	653	Colony	A. palmata	1			20.8461	-79.0181	OFY	Fabián	Tamara
31/08/2017	654	Colony	A. palmata	2			20.8461	-79.0182	OFY	Fabián	Tamara
31/08/2017	655	Colony	A. palmata	1			20.8461	-79.0181	OFY	Fabián	Tamara
31/08/2017	656	Colony	A. palmata	1			20.8463	-79.0181	OFY	Fabián	Tamara
31/08/2017	657	Colony	A. palmata	1			20.8463	-79.0182	OFY	Fabián	Tamara
31/08/2017	658	Colony	A. palmata	3			20.8462	-79.0182	OFY	Fabián	Tamara
31/08/2017	659	Colony	A. palmata	1			20.8462	-79.0182	OFY	Fabián	Tamara
31/08/2017	660	Colony	A. palmata	1			20.8461	-79.0183	OFY	Fabián	Tamara
31/08/2017	661	Colony	A. palmata	1			20.8461	-79.0183	OFY	Fabián	Tamara
31/08/2017	625	Colony	A. palmata	1			20.8357	-78.9914	Rojo CIEC	Claudia	Adrián
31/08/2017	626	Colony	A. palmata	1			20.8358	-78.9912	Rojo CIEC	Claudia	Adrián
31/08/2017	627	Colony	A. palmata	1			20.8363	-78.9914	Rojo CIEC	Claudia	Adrián
31/08/2017	628	Colony	A. palmata	1			20.8364	-78.9914	Rojo CIEC	Claudia	Adrián
31/08/2017	629	Fragments	A. palmata			11	20.8363	-78.9914	Rojo CIEC	Claudia	Adrián
31/08/2017	630	Colony	A. palmata	1			20.8364	-78.9915	Rojo CIEC	Claudia	Adrián
31/08/2017	631	Colony	A. palmata	1			20.8364	-78.9915	Rojo CIEC	Claudia	Adrián
31/08/2017	632	Colony	A. palmata	1			20.8364	-78.9914	Rojo CIEC	Claudia	Adrián
31/08/2017	633	Colony	A. palmata	1			20.8364	-78.9914	Rojo CIEC	Claudia	Adrián
31/08/2017	634	Colony	A. palmata	1			20.8365	-78.9914	Rojo CIEC	Claudia	Adrián
31/08/2017	635	Colony	A. palmata	1			20.8365	-78.9914	Rojo CIEC	Claudia	Adrián
31/08/2017	636	Colony	A. palmata	1		1	20.8365	-78.9914	Rojo CIEC	Claudia	Adrián
31/08/2017	637	Colony	A. palmata	1			20.8365	-78.9915	Rojo CIEC	Claudia	Adrián
31/08/2017	638	Colony	A. palmata	1			20.8365	-78.9915	Rojo CIEC	Claudia	Adrián
31/08/2017	639	Colony	A. palmata	1			20.8365	-78.9916	Rojo CIEC	Claudia	Adrián
31/08/2017	640	Colony	A. palmata	1		1	20.8365	-78.9916	Rojo CIEC	Claudia	Adrián
31/08/2017	641	Colony	A. palmata	1			20.8365	-78.9916	Rojo CIEC	Claudia	Adrián
31/08/2017	642	Colony	A. palmata	1			20.8364	-78.9915	Rojo CIEC	Claudia	Adrián
31/08/2017	643	Colony	A. palmata	1			20.8364	-78.9916	Rojo CIEC	Claudia	Adrián
31/08/2017	644	Colony	A. palmata	1		1	20.8364	-78.9916	Rojo CIEC	Claudia	Adrián
31/08/2017	645	Colony	A. palmata	1			20.8364	-78.9916	Rojo CIEC	Claudia	Adrián
31/08/2017	646	Colony	A. palmata	1			20.8364	-78.9916	Rojo CIEC	Claudia	Adrián
31/08/2017	647	Colony	A. palmata	1			20.8364	-78.9915	Rojo CIEC	Claudia	Adrián
31/08/2017	648	Colony	A. palmata	1		1	20.8364	-78.9916	Rojo CIEC	Claudia	Adrián
31/08/2017	649	Colony	A. palmata	1			20.8364	-78.9916	Rojo CIEC	Claudia	Adrián
31/08/2017	650	Colony	A. palmata	1			20.8363	-78.9916	Rojo CIEC	Claudia	Adrián
31/08/2017	651	Colony	A. palmata	1			20.8363	-78.9916	Rojo CIEC	Claudia	Adrián
31/08/2017	652	Colony	A. palmata	1			20.8363	-78.9916	Rojo CIEC	Claudia	Adrián
31/08/2017	653	Colony	A. palmata	1			20.8363	-78.9916	Rojo CIEC	Claudia	Adrián
31/08/2017	654	Colony	A. palmata	1			20.8363	-78.9917	Rojo CIEC	Claudia	Adrián
31/08/2017	655	Colony	A. palmata	1			20.8363	-78.9917	Rojo CIEC	Claudia	Adrián
31/08/2017	656	Colony	A. palmata	1			20.8364	-78.9917	Rojo CIEC	Claudia	Adrián
31/08/2017	657	Colony	A. palmata	1			20.8364	-78.9917	Rojo CIEC	Claudia	Adrián
31/08/2017	658	Colony	A. palmata	1			20.8365	-78.9916	Rojo CIEC	Claudia	Adrián
31/08/2017	659	Colony	A. palmata	1			20.8365	-78.9916	Rojo CIEC	Claudia	Adrián
31/08/2017	660	Colony	A. palmata	1			20.8365	-78.9916	Rojo CIEC	Claudia	Adrián
31/08/2017	661	Colony	A. palmata	1			20.8365	-78.9916	Rojo CIEC	Claudia	Adrián
31/08/2017	662	Colony	A. palmata	1			20.8365	-78.9916	Rojo CIEC	Claudia	Adrián
31/08/2017	663	Colony	A. palmata	1			20.8365	-78.9916	Rojo CIEC	Claudia	Adrián
31/08/2017	664	Colony	A. palmata	1			20.8365	-78.9916	Rojo CIEC	Claudia	Adrián
31/08/2017	665	Colony	A. palmata	1			20.8366	-78.9916	Rojo CIEC	Claudia	Adrián
31/08/2017	666	Colony	A. palmata	1			20.8366	-78.9917	Rojo CIEC	Claudia	Adrián
31/08/2017	667	Colony	A. palmata	1			20.8367	-78.9917	Rojo CIEC	Claudia	Adrián
31/08/2017	668	Colony	A. palmata	1			20.8374	-78.992	Rojo CIEC	Claudia	Adrián
31/08/2017	669	Colony	A. palmata	1			20.8374	-78.992	Rojo CIEC	Claudia	Adrián
31/08/2017	670	Colony	A. palmata	1			20.8374	-78.992	Rojo CIEC	Claudia	Adrián
31/08/2017	671	Colony	A. palmata	1			20.8374	-78.992	Rojo CIEC	Claudia	Adrián
31/08/2017	672	Colony	A. palmata	1			20.8375	-78.9921	Rojo CIEC	Claudia	Adrián
31/08/2017	673	Colony	A. palmata	1			20.8375	-78.9919	Rojo CIEC	Claudia	Adrián
31/08/2017	674	Colony	A. palmata	1			20.8374	-78.9921	Rojo CIEC	Claudia	Adrián
31/08/2017	675	Colony	A. palmata	1			20.8374	-78.9921	Rojo CIEC	Claudia	Adrián
31/08/2017	678	Colony	A. palmata	1			20.8439	-79.0015	Rojo CIEC	Claudia	Adrián
31/08/2017	679	Colony	A. palmata	1			20.8439	-79.0015	Rojo CIEC	Claudia	Adrián
31/08/2017	680	Colony	A. palmata	1			20.844	-79.0016	Rojo CIEC	Claudia	Adrián
31/08/2017	681	Colony	A. palmata	1			20.844	-79.0021	Rojo CIEC	Claudia	Adrián
31/08/2017	682	Colony	A. palmata	1			20.844	-79.0021	Rojo CIEC	Claudia	Adrián
31/08/2017	683	Colony	A. palmata	1			20.844	-79.0021	Rojo CIEC	Claudia	Adrián
31/08/2017	684	Colony	A. palmata	1			20.8439	-79.0021	Rojo CIEC	Claudia	Adrián
31/08/2017	685	Colony	A. palmata	1			20.8439	-79.0021	Rojo CIEC	Claudia	Adrián
31/08/2017	686	Colony	A. palmata	1			20.8439	-79.0022	Rojo CIEC	Claudia	Adrián
31/08/2017	687	Colony	A. palmata	1			20.8439	-79.0022	Rojo CIEC	Claudia	Adrián
31/08/2017	688	Colony	A. palmata	1			20.8439	-79.0022	Rojo CIEC	Claudia	Adrián
31/08/2017	689	Colony	A. palmata	1			20.8439	-79.0022	Rojo CIEC	Claudia	Adrián
31/08/2017	690	Colony	A. palmata	1			20.844	-79.0023	Rojo CIEC	Claudia	Adrián
31/08/2017	691	Colony	A. palmata	1			20.8441	-79.0027	Rojo CIEC	Claudia	Adrián
31/08/2017	692	Colony	A. palmata	1			20.844	-79.0027	Rojo CIEC	Claudia	Adrián
31/08/2017	693	Colony	A. palmata	1			20.8439	-79.0027	Rojo CIEC	Claudia	Adrián
31/08/2017	694	Colony	A. palmata	1			20.8439	-79.0027	Rojo CIEC	Claudia	Adrián
31/08/2017	695	Colony	A. palmata	1			20.844	-79.0029	Rojo CIEC	Claudia	Adrián
31/08/2017	696	Colony	A. palmata	1			20.844	-79.003	Rojo CIEC	Claudia	Adrián
31/08/2017	697	Colony	A. palmata	1			20.8439	-79.003	Rojo CIEC	Claudia	Adrián
31/08/2017	698	Colony	A. palmata	1			20.844	-79.0031	Rojo CIEC	Claudia	Adrián
31/08/2017	699	Colony	A. palmata	1			20.844	-79.0031	Rojo CIEC	Claudia	Adrián
31/08/2017	700	Colony	A. palmata	1			20.844	-79.0031	Rojo CIEC	Claudia	Adrián
31/08/2017	701	Colony	A. palmata	1			20.8442	-79.0035	Rojo CIEC	Claudia	Adrián
31/08/2017	702	Colony	A. palmata	1			20.844	-79.0039	Rojo CIEC	Claudia	Adrián
31/08/2017	703	Colony	A. palmata	1			20.8443	-79.0044	Rojo CIEC	Claudia	Adrián
31/08/2017	704	Colony	A. palmata	1			20.8443	-79.0045	Rojo CIEC	Claudia	Adrián
31/08/2017	705	Colony	A. palmata	1		2	20.8443	-79.0045	Rojo CIEC	Claudia	Adrián
31/08/2017	706	Colony	A. palmata	1			20.8443	-79.0045	Rojo CIEC	Claudia	Adrián
31/08/2017	707	Colony	A. palmata	1			20.8443	-79.0045	Rojo CIEC	Claudia	Adrián
31/08/2017	708	Colony	A. palmata	1			20.8444	-79.0046	Rojo CIEC	Claudia	Adrián
31/08/2017	709	Colony	A. palmata	1			20.8443	-79.0048	Rojo CIEC	Claudia	Adrián
31/08/2017	710	Colony	A. palmata	1			20.8444	-79.0047	Rojo CIEC	Claudia	Adrián
31/08/2017	711	Colony	A. palmata	1			20.8446	-79.0048	Rojo CIEC	Claudia	Adrián
31/08/2017	713	Colony	A. palmata	1			20.846	-79.0111	Rojo CIEC	Claudia	Adrián
31/08/2017	714	Colony	A. palmata	1			20.8466	-79.0115	Rojo CIEC	Claudia	Adrián
31/08/2017	715	Colony	A. palmata	1			20.8466	-79.0116	Rojo CIEC	Claudia	Adrián
31/08/2017	716	Colony	A. palmata	1			20.8465	-79.0117	Rojo CIEC	Claudia	Adrián
31/08/2017	717	Colony	A. palmata	1			20.8466	-79.0118	Rojo CIEC	Claudia	Adrián
31/08/2017	718	Colony	A. palmata	1			20.8466	-79.0118	Rojo CIEC	Claudia	Adrián
31/08/2017	719	Colony	A. palmata	1			20.8466	-79.0119	Rojo CIEC	Claudia	Adrián
31/08/2017	720	Colony	A. palmata	1			20.8466	-79.0119	Rojo CIEC	Claudia	Adrián
31/08/2017	721	Colony	A. palmata	1			20.8467	-79.0119	Rojo CIEC	Claudia	Adrián
31/08/2017	722	Colony	A. palmata	1			20.8467	-79.0121	Rojo CIEC	Claudia	Adrián
31/08/2017	723	Colony	A. palmata	1			20.8468	-79.0121	Rojo CIEC	Claudia	Adrián
31/08/2017	724	Colony	A. palmata	1			20.8469	-79.0128	Rojo CIEC	Claudia	Adrián
31/08/2017	725	Colony	A. palmata	1			20.8468	-79.0129	Rojo CIEC	Claudia	Adrián
31/08/2017	726	Colony	A. palmata	1			20.847	-79.0132	Rojo CIEC	Claudia	Adrián
31/08/2017	727	Colony	A. palmata	1			20.847	-79.0133	Rojo CIEC	Claudia	Adrián
31/08/2017	728	Colony	A. palmata	1			20.847	-79.0133	Rojo CIEC	Claudia	Adrián
31/08/2017	729	Colony	A. palmata	1			20.8471	-79.0134	Rojo CIEC	Claudia	Adrián
31/08/2017	730	Colony	A. palmata	1			20.847	-79.0137	Rojo CIEC	Claudia	Adrián
31/08/2017	731	Colony	A. palmata	1			20.847	-79.0137	Rojo CIEC	Claudia	Adrián
31/08/2017	732	Colony	A. palmata	1			20.8471	-79.014	Rojo CIEC	Claudia	Adrián
31/08/2017	733	Colony	A. palmata	1			20.8471	-79.0141	Rojo CIEC	Claudia	Adrián
31/08/2017	734	Colony	A. palmata	1			20.8472	-79.0143	Rojo CIEC	Claudia	Adrián
31/08/2017	524	Colony	A. palmata	1			20.8335	-78.99	2	Evelio	Leonel
31/08/2017	525	Colony	A. palmata	1			20.8336	-78.9904	2	Evelio	Leonel
31/08/2017	526	Colony	A. palmata	1			20.8336	-78.9904	2	Evelio	Leonel
31/08/2017	527	Colony	A. palmata	1			20.8336	-78.9905	2	Evelio	Leonel
31/08/2017	528	Colony	A. palmata	1			20.8336	-78.9905	2	Evelio	Leonel
31/08/2017	529	Colony	A. palmata	1			20.8337	-78.9905	2	Evelio	Leonel
31/08/2017	530	Colony	A. palmata	1			20.8337	-78.9905	2	Evelio	Leonel
31/08/2017	531	Colony	A. palmata	1			20.8337	-78.9906	2	Evelio	Leonel
31/08/2017	532	Colony	A. palmata	1			20.8338	-78.9907	2	Evelio	Leonel
31/08/2017	533	Colony	A. palmata	1			20.8338	-78.9907	2	Evelio	Leonel
31/08/2017	534	Colony	A. palmata	1			20.8339	-78.9907	2	Evelio	Leonel
31/08/2017	535	Colony	A. palmata	1			20.8338	-78.9908	2	Evelio	Leonel
31/08/2017	536	Colony	A. palmata	1			20.8338	-78.9908	2	Evelio	Leonel
31/08/2017	537	Colony	A. palmata	1			20.8338	-78.9908	2	Evelio	Leonel
31/08/2017	538	Colony	A. palmata	1			20.8338	-78.9908	2	Evelio	Leonel
31/08/2017	539	Colony	A. palmata	1			20.8339	-78.9909	2	Evelio	Leonel
31/08/2017	540	Colony	A. palmata	1			20.8338	-78.991	2	Evelio	Leonel
31/08/2017	541	Colony	A. palmata	1			20.8338	-78.991	2	Evelio	Leonel
31/08/2017	542	Colony	A. palmata	1			20.8341	-78.9908	2	Evelio	Leonel
31/08/2017	543	Colony	A. palmata	1			20.8341	-78.9907	2	Evelio	Leonel
31/08/2017	544	Colony	A. palmata	1			20.8342	-78.9907	2	Evelio	Leonel
31/08/2017	545	Colony	A. palmata	1			20.8342	-78.9908	2	Evelio	Leonel
31/08/2017	546	Colony	A. palmata	1			20.8342	-78.9908	2	Evelio	Leonel
31/08/2017	547	Colony	A. palmata	1			20.8342	-78.9908	2	Evelio	Leonel
31/08/2017	548	Colony	A. palmata	1			20.8342	-78.9907	2	Evelio	Leonel
31/08/2017	549	Colony	A. palmata	1			20.8342	-78.9907	2	Evelio	Leonel
31/08/2017	550	Colony	A. palmata	1			20.8342	-78.9908	2	Evelio	Leonel
31/08/2017	551	Colony	A. palmata	1			20.8341	-78.9908	2	Evelio	Leonel
31/08/2017	552	Colony	A. palmata	1			20.8341	-78.9909	2	Evelio	Leonel
31/08/2017	553	Colony	A. palmata	1			20.8341	-78.9909	2	Evelio	Leonel
31/08/2017	554	Colony	A. palmata	1			20.8342	-78.9909	2	Evelio	Leonel
31/08/2017	555	Colony	A. palmata	1			20.8342	-78.9909	2	Evelio	Leonel
31/08/2017	556	Colony	A. palmata	1			20.8342	-78.9909	2	Evelio	Leonel
31/08/2017	557	Colony	A. palmata	1			20.8347	-78.9908	2	Evelio	Leonel
31/08/2017	558	Colony	A. palmata	1			20.8347	-78.9908	2	Evelio	Leonel
31/08/2017	559	A. cervicornis	A. cervicornis	1			20.8347	-78.9908	2	Evelio	Leonel
31/08/2017	560	A. cervicornis	A. cervicornis	1			20.8347	-78.9908	2	Evelio	Leonel
31/08/2017	561	A. cervicornis	A. cervicornis	1			20.8347	-78.9908	2	Evelio	Leonel
31/08/2017	562	A. cervicornis	A. cervicornis	1			20.8347	-78.9908	2	Evelio	Leonel
31/08/2017	563	A. cervicornis	A. cervicornis	1			20.8347	-78.9907	2	Evelio	Leonel
31/08/2017	564	A. cervicornis	A. cervicornis	1			20.8347	-78.9907	2	Evelio	Leonel
31/08/2017	565	A. cervicornis	A. cervicornis	1			20.8347	-78.9907	2	Evelio	Leonel
31/08/2017	566	A. cervicornis	A. cervicornis	1			20.8347	-78.9907	2	Evelio	Leonel
31/08/2017	567	A. cervicornis	A. cervicornis	1			20.8347	-78.9907	2	Evelio	Leonel
31/08/2017	568	A. cervicornis	A. cervicornis	1			20.8347	-78.9907	2	Evelio	Leonel
31/08/2017	569	A. cervicornis	A. cervicornis	1			20.8347	-78.9907	2	Evelio	Leonel
31/08/2017	570	A. cervicornis	A. cervicornis	1			20.8348	-78.9907	2	Evelio	Leonel
31/08/2017	571	A. cervicornis	A. cervicornis	1			20.8347	-78.9907	2	Evelio	Leonel
31/08/2017	572	A. cervicornis	A. cervicornis	1			20.8347	-78.9907	2	Evelio	Leonel
31/08/2017	573	A. cervicornis	A. cervicornis	1			20.8348	-78.9907	2	Evelio	Leonel
31/08/2017	574	A. cervicornis	A. cervicornis	1			20.8348	-78.9907	2	Evelio	Leonel
31/08/2017	575	A. cervicornis	A. cervicornis	1			20.8347	-78.9907	2	Evelio	Leonel
31/08/2017	576	A. cervicornis	A. cervicornis	1			20.8348	-78.9907	2	Evelio	Leonel
31/08/2017	577	A. cervicornis	A. cervicornis	1			20.8348	-78.9907	2	Evelio	Leonel
31/08/2017	578	A. cervicornis	A. cervicornis	1			20.8348	-78.9907	2	Evelio	Leonel
31/08/2017	579	A. cervicornis	A. cervicornis	1			20.8348	-78.9907	2	Evelio	Leonel
31/08/2017	580	A. cervicornis	A. cervicornis	1			20.8348	-78.9906	2	Evelio	Leonel
31/08/2017	581	A. cervicornis	A. cervicornis	1			20.8348	-78.9907	2	Evelio	Leonel
31/08/2017	582	A. cervicornis	A. cervicornis	1			20.8348	-78.9906	2	Evelio	Leonel
31/08/2017	583	A. cervicornis	A. cervicornis	1			20.8347	-78.9906	2	Evelio	Leonel
31/08/2017	584	A. cervicornis	A. cervicornis	1			20.8347	-78.9906	2	Evelio	Leonel
31/08/2017	585	A. cervicornis	A. cervicornis	1			20.8347	-78.9906	2	Evelio	Leonel
31/08/2017	586	A. cervicornis	A. cervicornis	1			20.8347	-78.9906	2	Evelio	Leonel
31/08/2017	587	A. cervicornis	A. cervicornis	1			20.8347	-78.9906	2	Evelio	Leonel
31/08/2017	588	A. cervicornis	A. cervicornis	1			20.8347	-78.9906	2	Evelio	Leonel
31/08/2017	589	A. cervicornis	A. cervicornis	1			20.8347	-78.9906	2	Evelio	Leonel
31/08/2017	590	A. cervicornis	A. cervicornis	1			20.8347	-78.9905	2	Evelio	Leonel
31/08/2017	591	A. cervicornis	A. cervicornis	1			20.8347	-78.9905	2	Evelio	Leonel
31/08/2017	592	A. cervicornis	A. cervicornis	1			20.8347	-78.9905	2	Evelio	Leonel
31/08/2017	593	Colony	A. palmata	1			20.8348	-78.9908	2	Evelio	Leonel
31/08/2017	594	Colony	A. palmata	1			20.8348	-78.9908	2	Evelio	Leonel
31/08/2017	595	Colony	A. palmata	1			20.8348	-78.9908	2	Evelio	Leonel
31/08/2017	596	Colony	A. palmata	1			20.8348	-78.9908	2	Evelio	Leonel
31/08/2017	597	A. cervicornis	A. cervicornis	1			20.8349	-78.9907	2	Evelio	Leonel
31/08/2017	598	A. cervicornis	A. cervicornis	1			20.8349	-78.9907	2	Evelio	Leonel
31/08/2017	599	A. cervicornis	A. cervicornis	1			20.8349	-78.9907	2	Evelio	Leonel
31/08/2017	600	A. cervicornis	A. cervicornis	1			20.8349	-78.9907	2	Evelio	Leonel
31/08/2017	601	A. cervicornis	A. cervicornis	1			20.8349	-78.9907	2	Evelio	Leonel
31/08/2017	602	A. cervicornis	A. cervicornis	1			20.8349	-78.9907	2	Evelio	Leonel
31/08/2017	603	Colony	A. palmata	1			20.8349	-78.9908	2	Evelio	Leonel
31/08/2017	604	Colony	A. palmata	1			20.8349	-78.9909	2	Evelio	Leonel
31/08/2017	605	Colony	A. palmata	1			20.8349	-78.9909	2	Evelio	Leonel
31/08/2017	606	Colony	A. palmata	1			20.8349	-78.9909	2	Evelio	Leonel
31/08/2017	607	Colony	A. palmata	1			20.8349	-78.9909	2	Evelio	Leonel
31/08/2017	608	Colony	A. palmata	1			20.8349	-78.9909	2	Evelio	Leonel
31/08/2017	609	Colony	A. palmata	1			20.835	-78.9909	2	Evelio	Leonel
31/08/2017	610	A. cervicornis	A. cervicornis	1			20.8351	-78.9908	2	Evelio	Leonel
31/08/2017	611	A. cervicornis	A. cervicornis	1			20.8351	-78.9908	2	Evelio	Leonel
31/08/2017	612	A. cervicornis	A. cervicornis	1			20.8351	-78.9908	2	Evelio	Leonel
31/08/2017	613	A. cervicornis	A. cervicornis	1			20.8351	-78.9908	2	Evelio	Leonel
31/08/2017	614	A. cervicornis	A. cervicornis	1			20.8351	-78.9908	2	Evelio	Leonel
31/08/2017	615	Colony	A. palmata	1			20.8352	-78.9909	2	Evelio	Leonel
31/08/2017	616	Fragments	A. palmata			4	20.8352	-78.9909	2	Evelio	Leonel
31/08/2017	617	Colony	A. palmata	1			20.8351	-78.9909	2	Evelio	Leonel
31/08/2017	618	Fragments	A. palmata			19	20.8351	-78.991	2	Evelio	Leonel
31/08/2017	619	Colony	A. palmata	1			20.835	-78.991	2	Evelio	Leonel
31/08/2017	620	Colony	A. palmata	1			20.8351	-78.991	2	Evelio	Leonel
31/08/2017	621	Colony	A. palmata	1			20.8351	-78.991	2	Evelio	Leonel
31/08/2017	622	Fragments	A. palmata			3	20.8351	-78.991	2	Evelio	Leonel
31/08/2017	623	Colony	A. palmata	1			20.8351	-78.991	2	Evelio	Leonel
31/08/2017	624	Colony	A. palmata	1			20.8351	-78.991	2	Evelio	Leonel
31/08/2017	625	Colony	A. palmata	1			20.8351	-78.991	2	Evelio	Leonel
31/08/2017	626	Colony	A. palmata	1			20.8351	-78.991	2	Evelio	Leonel
31/08/2017	627	Colony	A. palmata	1			20.8351	-78.991	2	Evelio	Leonel
31/08/2017	628	Colony	A. palmata	1			20.8351	-78.991	2	Evelio	Leonel
31/08/2017	629	Colony	A. palmata	1			20.8352	-78.9911	2	Evelio	Leonel
31/08/2017	630	Colony	A. palmata	1			20.8352	-78.991	2	Evelio	Leonel
31/08/2017	631	Colony	A. palmata	1			20.8352	-78.991	2	Evelio	Leonel
31/08/2017	632	A. cervicornis	A. cervicornis	1			20.8353	-78.9908	2	Evelio	Leonel
31/08/2017	633	A. cervicornis	A. cervicornis	1			20.8354	-78.9908	2	Evelio	Leonel
31/08/2017	634	A. cervicornis	A. cervicornis	1			20.8353	-78.9909	2	Evelio	Leonel
31/08/2017	635	Colony	A. palmata	1			20.8355	-78.9908	2	Evelio	Leonel
31/08/2017	636	Colony	A. palmata	1			20.8355	-78.9908	2	Evelio	Leonel
31/08/2017	637	Colony	A. palmata	1			20.8355	-78.9909	2	Evelio	Leonel
31/08/2017	638	Colony	A. palmata	1			20.8355	-78.9909	2	Evelio	Leonel
31/08/2017	639	Colony	A. palmata	1			20.8355	-78.9909	2	Evelio	Leonel
31/08/2017	640	A. cervicornis	A. cervicornis	1			20.8354	-78.9909	2	Evelio	Leonel
31/08/2017	641	Colony	A. palmata	1			20.8355	-78.9909	2	Evelio	Leonel
31/08/2017	642	A. cervicornis	A. cervicornis	1			20.8355	-78.9909	2	Evelio	Leonel
31/08/2017	643	A. cervicornis	A. cervicornis	1			20.8356	-78.9908	2	Evelio	Leonel
31/08/2017	644	Colony	A. palmata	1			20.8356	-78.9908	2	Evelio	Leonel
31/08/2017	645	Colony	A. palmata	1			20.8356	-78.9909	2	Evelio	Leonel
31/08/2017	646	A. cervicornis	A. cervicornis	1			20.8356	-78.9909	2	Evelio	Leonel
31/08/2017	647	A. cervicornis	A. cervicornis	1			20.8356	-78.9909	2	Evelio	Leonel
31/08/2017	648	A. cervicornis	A. cervicornis	1			20.8356	-78.9909	2	Evelio	Leonel
31/08/2017	649	A. cervicornis	A. cervicornis	1			20.8356	-78.9909	2	Evelio	Leonel
31/08/2017	650	A. cervicornis	A. cervicornis	1			20.8356	-78.9909	2	Evelio	Leonel
31/08/2017	651	A. cervicornis	A. cervicornis	1			20.8355	-78.9909	2	Evelio	Leonel
31/08/2017	652	A. cervicornis	A. cervicornis	1			20.8356	-78.9909	2	Evelio	Leonel
31/08/2017	653	A. cervicornis	A. cervicornis	1			20.8356	-78.9909	2	Evelio	Leonel
31/08/2017	654	A. cervicornis	A. cervicornis	1			20.8355	-78.991	2	Evelio	Leonel
31/08/2017	655	A. cervicornis	A. cervicornis	1			20.8355	-78.991	2	Evelio	Leonel
31/08/2017	656	Colony	A. palmata	1			20.8355	-78.9911	2	Evelio	Leonel
31/08/2017	657	A. cervicornis	A. cervicornis	1			20.8416	-78.9946	2	Evelio	Leonel
31/08/2017	658	A. cervicornis	A. cervicornis	1			20.8416	-78.9946	2	Evelio	Leonel
31/08/2017	659	A. cervicornis	A. cervicornis	1			20.8416	-78.9946	2	Evelio	Leonel
31/08/2017	660	A. cervicornis	A. cervicornis	1			20.8416	-78.9946	2	Evelio	Leonel
31/08/2017	661	Colony	A. palmata	1			20.8417	-78.9947	2	Evelio	Leonel
31/08/2017	662	Colony	A. palmata	1			20.8419	-78.9956	2	Evelio	Leonel
31/08/2017	663	Colony	A. palmata	1			20.842	-78.9956	2	Evelio	Leonel
31/08/2017	664	Colony	A. palmata	1			20.842	-78.9956	2	Evelio	Leonel
31/08/2017	665	Colony	A. palmata	1			20.842	-78.9956	2	Evelio	Leonel
31/08/2017	666	Colony	A. palmata	1			20.8427	-78.9974	2	Evelio	Leonel
31/08/2017	667	Colony	A. palmata	1			20.8428	-78.9983	2	Evelio	Leonel
31/08/2017	668	Colony	A. palmata	1			20.8429	-78.9983	2	Evelio	Leonel
31/08/2017	669	Colony	A. palmata	1			20.843	-78.9983	2	Evelio	Leonel
31/08/2017	670	Colony	A. palmata	1			20.843	-78.9986	2	Evelio	Leonel
31/08/2017	671	Colony	A. palmata	1			20.843	-78.9986	2	Evelio	Leonel
31/08/2017	672	Fragments	A. palmata			10	20.8429	-78.9987	2	Evelio	Leonel
31/08/2017	673	Colony	A. palmata	1			20.843	-78.9988	2	Evelio	Leonel
31/08/2017	674	Colony	A. palmata	1			20.843	-78.9988	2	Evelio	Leonel
31/08/2017	675	Colony	A. palmata	1			20.843	-78.9988	2	Evelio	Leonel
31/08/2017	676	Colony	A. palmata	1			20.843	-78.9988	2	Evelio	Leonel
31/08/2017	677	Colony	A. palmata	1			20.843	-78.9988	2	Evelio	Leonel
31/08/2017	678	Colony	A. palmata	1			20.843	-78.9988	2	Evelio	Leonel
31/08/2017	679	Colony	A. palmata	1			20.843	-78.9988	2	Evelio	Leonel
31/08/2017	680	Colony	A. palmata	1			20.843	-78.9988	2	Evelio	Leonel
31/08/2017	681	Colony	A. palmata	1			20.843	-78.9988	2	Evelio	Leonel
31/08/2017	682	Colony	A. palmata	1			20.8431	-78.9988	2	Evelio	Leonel
31/08/2017	683	Colony	A. palmata	1			20.843	-78.9988	2	Evelio	Leonel
31/08/2017	684	Colony	A. palmata	1			20.8435	-78.9994	2	Evelio	Leonel
31/08/2017	685	Colony	A. palmata	1			20.8436	-78.9994	2	Evelio	Leonel
31/08/2017	686	Colony	A. palmata	1			20.8436	-78.9994	2	Evelio	Leonel
31/08/2017	687	Fragments	A. palmata			6	20.8436	-78.9994	2	Evelio	Leonel
31/08/2017	688	Colony	A. palmata	1			20.8439	-79.0015	2	Evelio	Leonel
31/08/2017	689	Colony	A. palmata	1			20.8471	-79.0144	2	Evelio	Leonel
31/08/2017	690	Colony	A. palmata	1			20.8472	-79.0144	2	Evelio	Leonel
31/08/2017	691	Colony	A. palmata	1			20.8472	-79.0149	2	Evelio	Leonel
31/08/2017	692	Colony	A. palmata	1			20.8472	-79.015	2	Evelio	Leonel
31/08/2017	693	Colony	A. palmata	1			20.8472	-79.015	2	Evelio	Leonel
31/08/2017	694	Colony	A. palmata	1			20.8473	-79.0151	2	Evelio	Leonel
31/08/2017	695	Colony	A. palmata	1			20.8473	-79.0152	2	Evelio	Leonel
31/08/2017	696	Colony	A. palmata	1			20.8473	-79.0152	2	Evelio	Leonel
31/08/2017	697	Colony	A. palmata	1			20.8473	-79.0152	2	Evelio	Leonel
31/08/2017	698	Colony	A. palmata	1			20.8471	-79.0154	2	Evelio	Leonel
31/08/2017	699	Colony	A. palmata	1			20.8471	-79.0157	2	Evelio	Leonel
31/08/2017	700	Colony	A. palmata	1			20.8471	-79.0157	2	Evelio	Leonel
31/08/2017	701	Colony	A. palmata	1			20.8471	-79.0157	2	Evelio	Leonel
31/08/2017	702	Colony	A. palmata	1			20.8471	-79.0157	2	Evelio	Leonel
31/08/2017	703	Colony	A. palmata	1			20.8471	-79.0157	2	Evelio	Leonel
31/08/2017	704	Colony	A. palmata	1			20.8471	-79.0158	2	Evelio	Leonel
31/08/2017	705	Colony	A. palmata	1			20.8471	-79.0158	2	Evelio	Leonel
31/08/2017	706	Colony	A. palmata	1			20.8471	-79.0158	2	Evelio	Leonel
31/08/2017	707	Colony	A. palmata	1			20.8471	-79.0158	2	Evelio	Leonel
31/08/2017	708	Colony	A. palmata	1			20.8472	-79.0158	2	Evelio	Leonel
31/08/2017	709	Colony	A. palmata	1			20.8472	-79.0157	2	Evelio	Leonel
31/08/2017	710	Colony	A. palmata	1			20.8472	-79.0157	2	Evelio	Leonel
31/08/2017	711	Colony	A. palmata	1			20.8472	-79.0157	2	Evelio	Leonel
31/08/2017	712	Colony	A. palmata	1			20.8471	-79.0157	2	Evelio	Leonel
31/08/2017	713	Colony	A. palmata	1			20.8472	-79.0157	2	Evelio	Leonel
31/08/2017	714	Colony	A. palmata	1			20.8472	-79.0158	2	Evelio	Leonel
31/08/2017	715	Colony	A. palmata	1			20.8472	-79.0158	2	Evelio	Leonel
31/08/2017	716	Colony	A. palmata	1			20.8472	-79.0158	2	Evelio	Leonel
31/08/2017	717	Colony	A. palmata	1			20.8472	-79.0158	2	Evelio	Leonel
31/08/2017	718	Colony	A. palmata	1			20.8471	-79.0161	2	Evelio	Leonel
31/08/2017	719	Colony	A. palmata	1			20.8471	-79.0161	2	Evelio	Leonel
31/08/2017	720	Colony	A. palmata	1			20.8471	-79.0161	2	Evelio	Leonel
31/08/2017	721	Colony	A. palmata	1			20.8471	-79.0162	2	Evelio	Leonel
31/08/2017	722	Colony	A. palmata	1			20.8471	-79.0163	2	Evelio	Leonel
31/08/2017	723	Colony	A. palmata	1			20.8471	-79.0163	2	Evelio	Leonel
31/08/2017	724	Colony	A. palmata	1			20.8469	-79.0167	2	Evelio	Leonel
31/08/2017	725	Colony	A. palmata	1			20.8469	-79.0167	2	Evelio	Leonel
31/08/2017	726	Colony	A. palmata	1			20.8469	-79.0167	2	Evelio	Leonel
31/08/2017	727	Colony	A. palmata	1			20.8469	-79.0168	2	Evelio	Leonel
31/08/2017	728	Colony	A. palmata	1			20.8469	-79.0169	2	Evelio	Leonel
31/08/2017	729	Colony	A. palmata	1			20.8469	-79.017	2	Evelio	Leonel
31/08/2017	55	Fragments	A. palmata			21	20.8466	-79.0225	1	Dayli	Maydel
31/08/2017	56	Colony	A. palmata	1			20.8466	-79.0225	1	Dayli	Maydel
31/08/2017	57	Colony	A. palmata	1			20.8466	-79.0225	1	Dayli	Maydel
31/08/2017	58	Colony	A. palmata	1			20.8466	-79.0225	1	Dayli	Maydel
31/08/2017	59	Fragments	A. palmata			23	20.8466	-79.0225	1	Dayli	Maydel
31/08/2017	60	Colony	A. palmata	1			20.8466	-79.0225	1	Dayli	Maydel
31/08/2017	61	Colony	A. palmata	2			20.8465	-79.0225	1	Dayli	Maydel
31/08/2017	62	Colony	A. palmata	3			20.8465	-79.0225	1	Dayli	Maydel
31/08/2017	63	Colony	A. palmata	1			20.8465	-79.0225	1	Dayli	Maydel
31/08/2017	64	Colony	A. palmata	2			20.8465	-79.0225	1	Dayli	Maydel
31/08/2017	65	Colony	A. palmata	1			20.8465	-79.0225	1	Dayli	Maydel
31/08/2017	66	Colony	A. palmata	1			20.8465	-79.0225	1	Dayli	Maydel
31/08/2017	67	Colony	A. palmata	2			20.8466	-79.0225	1	Dayli	Maydel
31/08/2017	68	Colony	A. palmata	1			20.8466	-79.0225	1	Dayli	Maydel
31/08/2017	69	Colony	A. palmata	3			20.8465	-79.0226	1	Dayli	Maydel
31/08/2017	70	Colony	A. palmata	1			20.8464	-79.0225	1	Dayli	Maydel
31/08/2017	71	Colony	A. palmata	1			20.8464	-79.0225	1	Dayli	Maydel
31/08/2017	72	Colony	A. palmata	1			20.8465	-79.0225	1	Dayli	Maydel
31/08/2017	73	Colony	A. palmata	1			20.8466	-79.0225	1	Dayli	Maydel
31/08/2017	74	Colony	A. palmata	1			20.8467	-79.0226	1	Dayli	Maydel
31/08/2017	75	Colony	A. palmata	1			20.8468	-79.0225	1	Dayli	Maydel
31/08/2017	76	Colony	A. palmata	1			20.8468	-79.0226	1	Dayli	Maydel
31/08/2017	77	Colony	A. palmata	1			20.8468	-79.0226	1	Dayli	Maydel
31/08/2017	78	Colony	A. palmata	1			20.8466	-79.0227	1	Dayli	Maydel
31/08/2017	79	Colony	A. palmata	1			20.8466	-79.0227	1	Dayli	Maydel
31/08/2017	80	Colony	A. palmata	1			20.8468	-79.0228	1	Dayli	Maydel
31/08/2017	81	Colony	A. palmata	1			20.8464	-79.0229	1	Dayli	Maydel
31/08/2017	82	Fragments	A. palmata			6	20.8464	-79.0231	1	Dayli	Maydel
31/08/2017	83	Colony	A. palmata	1			20.8463	-79.0232	1	Dayli	Maydel
31/08/2017	84	Colony	A. palmata	1			20.8463	-79.0232	1	Dayli	Maydel
31/08/2017	85	Colony	A. palmata	1			20.8464	-79.0233	1	Dayli	Maydel
31/08/2017	86	Colony	A. palmata	1			20.8466	-79.0233	1	Dayli	Maydel
31/08/2017	87	Colony	A. palmata	1			20.8466	-79.0233	1	Dayli	Maydel
31/08/2017	88	Fragments	A. palmata			21	20.8464	-79.0235	1	Dayli	Maydel
31/08/2017	89	Colony	A. palmata	1			20.8464	-79.0235	1	Dayli	Maydel
31/08/2017	90	Colony	A. palmata	1			20.8464	-79.0236	1	Dayli	Maydel
31/08/2017	91	Colony	A. palmata	1			20.8464	-79.0236	1	Dayli	Maydel
31/08/2017	92	Colony	A. palmata	1			20.8464	-79.0236	1	Dayli	Maydel
31/08/2017	93	Colony	A. palmata	1		30	20.8465	-79.0235	1	Dayli	Maydel
31/08/2017	94	Colony	A. palmata	3			20.8466	-79.0234	1	Dayli	Maydel
31/08/2017	95	Colony	A. palmata	1			20.8466	-79.0234	1	Dayli	Maydel
31/08/2017	96	Colony	A. palmata	3			20.8466	-79.0233	1	Dayli	Maydel
31/08/2017	97	Colony	A. palmata	1			20.8467	-79.0235	1	Dayli	Maydel
31/08/2017	98	Colony	A. palmata	2			20.8465	-79.0237	1	Dayli	Maydel
31/08/2017	99	Colony	A. palmata	2			20.8465	-79.0237	1	Dayli	Maydel
31/08/2017	100	Colony	A. palmata	1			20.8465	-79.0237	1	Dayli	Maydel
31/08/2017	101	Colony	A. palmata	2			20.8464	-79.0237	1	Dayli	Maydel
31/08/2017	102	Colony	A. palmata	1			20.8464	-79.0237	1	Dayli	Maydel
31/08/2017	103	Colony	A. palmata	2			20.8464	-79.0237	1	Dayli	Maydel
31/08/2017	104	Colony	A. palmata	1			20.8464	-79.0237	1	Dayli	Maydel
31/08/2017	105	Colony	A. palmata	2			20.8464	-79.0237	1	Dayli	Maydel
31/08/2017	106	Colony	A. palmata	1			20.8464	-79.0237	1	Dayli	Maydel
31/08/2017	107	Colony	A. palmata	2			20.8464	-79.0237	1	Dayli	Maydel
31/08/2017	108	Colony	A. palmata	1			20.8463	-79.0237	1	Dayli	Maydel
31/08/2017	109	Colony	A. palmata	1			20.8466	-79.0237	1	Dayli	Maydel
31/08/2017	110	Colony	A. palmata	1			20.8468	-79.0237	1	Dayli	Maydel
31/08/2017	111	Colony	A. palmata	1			20.8468	-79.0237	1	Dayli	Maydel
31/08/2017	112	Colony	A. palmata	1			20.8468	-79.0237	1	Dayli	Maydel
31/08/2017	113	Colony	A. palmata	4			20.8467	-79.0237	1	Dayli	Maydel
31/08/2017	114	Colony	A. palmata	1			20.8468	-79.0238	1	Dayli	Maydel
31/08/2017	115	Colony	A. palmata	7			20.8468	-79.0238	1	Dayli	Maydel
31/08/2017	116	Colony	A. palmata	4			20.8468	-79.0238	1	Dayli	Maydel
31/08/2017	117	Colony	A. palmata	1			20.8467	-79.0237	1	Dayli	Maydel
31/08/2017	118	Colony	A. palmata	1			20.8467	-79.0237	1	Dayli	Maydel
31/08/2017	119	Colony	A. palmata	4			20.8467	-79.0238	1	Dayli	Maydel
31/08/2017	120	Colony	A. palmata	1			20.8467	-79.0239	1	Dayli	Maydel
31/08/2017	121	Colony	A. palmata	1			20.8467	-79.0239	1	Dayli	Maydel
31/08/2017	122	Colony	A. palmata	1			20.8467	-79.0239	1	Dayli	Maydel
31/08/2017	123	Colony	A. palmata	1			20.8469	-79.024	1	Dayli	Maydel
31/08/2017	124	Colony	A. palmata	2			20.8469	-79.0242	1	Dayli	Maydel
31/08/2017	125	Colony	A. palmata	1			20.8468	-79.0244	1	Dayli	Maydel
31/08/2017	126	Colony	A. palmata	1			20.8496	-79.0272	1	Dayli	Maydel
31/08/2017	127	A. cervicornis	A. cervicornis	1			20.85	-79.0272	1	Dayli	Maydel
31/08/2017	128	A. cervicornis	A. cervicornis	1			20.85	-79.0273	1	Dayli	Maydel
31/08/2017	129	A. cervicornis	A. cervicornis	1			20.85	-79.0273	1	Dayli	Maydel
31/08/2017	130	A. cervicornis	A. cervicornis	1			20.85	-79.0273	1	Dayli	Maydel
31/08/2017	131	A. cervicornis	A. cervicornis	1			20.85	-79.0272	1	Dayli	Maydel
31/08/2017	132	A. cervicornis	A. cervicornis	1			20.8499	-79.0273	1	Dayli	Maydel
31/08/2017	133	Colony	A. palmata	1			20.8499	-79.0275	1	Dayli	Maydel
31/08/2017	134	Colony	A. palmata	1			20.85	-79.0281	1	Dayli	Maydel
31/08/2017	135	Colony	A. palmata	1			20.85	-79.0281	1	Dayli	Maydel
31/08/2017	140	Colony	A. palmata	1			20.8522	-79.0342	1	Dayli	Maydel
31/08/2017	141	Colony	A. palmata	1			20.8522	-79.0343	1	Dayli	Maydel
31/08/2017	142	Colony	A. palmata	1			20.8522	-79.0343	1	Dayli	Maydel
31/08/2017	143	Colony	A. palmata	3			20.8523	-79.0344	1	Dayli	Maydel
31/08/2017	144	Colony	A. palmata	1			20.8524	-79.0343	1	Dayli	Maydel
31/08/2017	145	Colony	A. palmata	1		6	20.8523	-79.0346	1	Dayli	Maydel
31/08/2017	146	Colony	A. palmata	1			20.8523	-79.0347	1	Dayli	Maydel
31/08/2017	147	Colony	A. palmata	1			20.8523	-79.0348	1	Dayli	Maydel
31/08/2017	148	Colony	A. palmata	1			20.8524	-79.0348	1	Dayli	Maydel
31/08/2017	149	Colony	A. palmata	1			20.8524	-79.0348	1	Dayli	Maydel
31/08/2017	150	Colony	A. palmata	1			20.8525	-79.0347	1	Dayli	Maydel
31/08/2017	151	Colony	A. palmata	1			20.8523	-79.0353	1	Dayli	Maydel
31/08/2017	152	Colony	A. palmata	1			20.8525	-79.0354	1	Dayli	Maydel
31/08/2017	153	Colony	A. palmata	1			20.8524	-79.0354	1	Dayli	Maydel
31/08/2017	662	Colony	A. palmata	1		3	20.8465	-79.0204	OFY	Lisadys	Víctor
31/08/2017	663	Colony	A. palmata	1			20.8465	-79.0204	OFY	Lisadys	Víctor
31/08/2017	664	Colony	A. palmata	1			20.8465	-79.0204	OFY	Lisadys	Víctor
31/08/2017	665	Colony	A. palmata	1			20.8466	-79.0204	OFY	Lisadys	Víctor
31/08/2017	666	Colony	A. palmata	1			20.8466	-79.0208	OFY	Lisadys	Víctor
31/08/2017	667	Colony	A. palmata			7	20.8466	-79.0208	OFY	Lisadys	Víctor
31/08/2017	668	Colony	A. palmata	1			20.8466	-79.0208	OFY	Lisadys	Víctor
31/08/2017	669	Colony	A. palmata	1			20.8466	-79.0211	OFY	Lisadys	Víctor
31/08/2017	670	Colony	A. palmata	1			20.8466	-79.0211	OFY	Lisadys	Víctor
31/08/2017	671	Colony	A. palmata	1			20.8465	-79.0211	OFY	Lisadys	Víctor
31/08/2017	672	Colony	A. palmata	1			20.8465	-79.0211	OFY	Lisadys	Víctor
31/08/2017	673	Colony	A. palmata	1			20.8465	-79.0211	OFY	Lisadys	Víctor
31/08/2017	674	Colony	A. palmata	1			20.8465	-79.0211	OFY	Lisadys	Víctor
31/08/2017	674	Colony	A. palmata	1			20.8465	-79.0211	OFY	Lisadys	Víctor
31/08/2017	676	Colony	A. palmata	1			20.8465	-79.0212	OFY	Lisadys	Víctor
31/08/2017	677	Colony	A. palmata	1			20.8465	-79.0212	OFY	Lisadys	Víctor
31/08/2017	678	Colony	A. palmata	1			20.8466	-79.0215	OFY	Lisadys	Víctor
31/08/2017	679	Colony	A. palmata	1			20.8466	-79.0216	OFY	Lisadys	Víctor
31/08/2017	680	Colony	A. palmata	1			20.8466	-79.0216	OFY	Lisadys	Víctor
31/08/2017	681	Colony	A. palmata	1			20.8466	-79.0216	OFY	Lisadys	Víctor
31/08/2017	682	Colony	A. palmata	1			20.8466	-79.0216	OFY	Lisadys	Víctor
31/08/2017	683	Colony	A. palmata	1			20.8466	-79.0216	OFY	Lisadys	Víctor
31/08/2017	684	Colony	A. palmata	1			20.8466	-79.0216	OFY	Lisadys	Víctor
31/08/2017	685	Colony	A. palmata	1			20.8466	-79.0216	OFY	Lisadys	Víctor
31/08/2017	686	Colony	A. palmata	1			20.8466	-79.0216	OFY	Lisadys	Víctor
31/08/2017	687	Colony	A. palmata	1			20.8466	-79.0217	OFY	Lisadys	Víctor
31/08/2017	688	Colony	A. palmata	1			20.8467	-79.0218	OFY	Lisadys	Víctor
31/08/2017	689	Colony	A. palmata	1			20.8467	-79.0219	OFY	Lisadys	Víctor
31/08/2017	690	Colony	A. palmata	1			20.8466	-79.022	OFY	Lisadys	Víctor
31/08/2017	691	Colony	A. palmata	1			20.8467	-79.0222	OFY	Lisadys	Víctor
31/08/2017	692	Colony	A. palmata	1			20.8466	-79.0223	OFY	Lisadys	Víctor
31/08/2017	693	Colony	A. palmata	1			20.8466	-79.0223	OFY	Lisadys	Víctor
31/08/2017	694	Colony	A. palmata			1	20.8466	-79.0222	OFY	Lisadys	Víctor
31/08/2017	695	Colony	A. palmata	1			20.8465	-79.0222	OFY	Lisadys	Víctor
31/08/2017	696	Colony	A. palmata	1			20.8465	-79.0221	OFY	Lisadys	Víctor
31/08/2017	697	Colony	A. palmata	1			20.8465	-79.0221	OFY	Lisadys	Víctor
31/08/2017	699	Colony	A. palmata	1			20.8468	-79.0245	OFY	Lisadys	Víctor
31/08/2017	700	Colony	A. palmata	1			20.8469	-79.0246	OFY	Lisadys	Víctor
31/08/2017	701	Colony	A. palmata	1			20.8469	-79.0246	OFY	Lisadys	Víctor
31/08/2017	702	Colony	A. palmata	1			20.8469	-79.0246	OFY	Lisadys	Víctor
31/08/2017	703	Colony	A. palmata	1			20.8469	-79.0246	OFY	Lisadys	Víctor
31/08/2017	704	Colony	A. palmata	1			20.8469	-79.0246	OFY	Lisadys	Víctor
31/08/2017	705	Colony	A. palmata	1			20.8469	-79.0246	OFY	Lisadys	Víctor
31/08/2017	706	Colony	A. palmata			2	20.8469	-79.0246	OFY	Lisadys	Víctor
31/08/2017	707	Colony	A. palmata	1			20.8469	-79.0247	OFY	Lisadys	Víctor
31/08/2017	708	Colony	A. palmata	1			20.8469	-79.0247	OFY	Lisadys	Víctor
31/08/2017	709	Colony	A. palmata	1			20.8469	-79.0247	OFY	Lisadys	Víctor
31/08/2017	710	Colony	A. palmata	1			20.8469	-79.0247	OFY	Lisadys	Víctor
31/08/2017	711	Colony	A. palmata	1			20.8468	-79.0247	OFY	Lisadys	Víctor
31/08/2017	712	Colony	A. palmata	1			20.8468	-79.0247	OFY	Lisadys	Víctor
31/08/2017	713	Colony	A. palmata	1			20.8468	-79.0247	OFY	Lisadys	Víctor
31/08/2017	714	Colony	A. palmata	1			20.8468	-79.0247	OFY	Lisadys	Víctor
31/08/2017	715	Colony	A. palmata			4	20.8468	-79.0247	OFY	Lisadys	Víctor
31/08/2017	716	Colony	A. palmata	1		1	20.8467	-79.0247	OFY	Lisadys	Víctor
31/08/2017	717	Colony	A. palmata	1			20.8467	-79.0247	OFY	Lisadys	Víctor
31/08/2017	718	Colony	A. palmata	1			20.8467	-79.0247	OFY	Lisadys	Víctor
31/08/2017	719	Colony	A. palmata	1			20.8467	-79.0248	OFY	Lisadys	Víctor
31/08/2017	720	Colony	A. palmata	1			20.8467	-79.0248	OFY	Lisadys	Víctor
31/08/2017	721	Colony	A. palmata	1			20.8467	-79.0248	OFY	Lisadys	Víctor
31/08/2017	722	Colony	A. palmata	1			20.8467	-79.0248	OFY	Lisadys	Víctor
31/08/2017	723	Colony	A. palmata	1			20.8467	-79.0247	OFY	Lisadys	Víctor
31/08/2017	724	Colony	A. palmata	1			20.8467	-79.0247	OFY	Lisadys	Víctor
31/08/2017	725	Colony	A. palmata	1			20.847	-79.0247	OFY	Lisadys	Víctor
31/08/2017	726	Colony	A. palmata	1			20.8469	-79.0247	OFY	Lisadys	Víctor
31/08/2017	727	Colony	A. palmata	1			20.8469	-79.0248	OFY	Lisadys	Víctor
31/08/2017	728	Colony	A. palmata	1			20.8469	-79.0247	OFY	Lisadys	Víctor
31/08/2017	729	Colony	A. palmata	1			20.8469	-79.0247	OFY	Lisadys	Víctor
31/08/2017	730	Colony	A. palmata	1			20.8469	-79.0247	OFY	Lisadys	Víctor
31/08/2017	731	Colony	A. palmata	1			20.8469	-79.0247	OFY	Lisadys	Víctor
31/08/2017	732	Colony	A. palmata	1			20.8469	-79.0248	OFY	Lisadys	Víctor
31/08/2017	733	Colony	A. palmata	1			20.8469	-79.0248	OFY	Lisadys	Víctor
31/08/2017	734	Colony	A. palmata	1			20.8469	-79.0248	OFY	Lisadys	Víctor
31/08/2017	735	Colony	A. palmata	1			20.8469	-79.0248	OFY	Lisadys	Víctor
31/08/2017	736	Colony	A. palmata	1			20.8469	-79.0248	OFY	Lisadys	Víctor
31/08/2017	737	Colony	A. palmata	1			20.8469	-79.0248	OFY	Lisadys	Víctor
31/08/2017	738	Colony	A. palmata	1			20.8469	-79.0248	OFY	Lisadys	Víctor
31/08/2017	739	Colony	A. palmata	1			20.8469	-79.0248	OFY	Lisadys	Víctor
31/08/2017	740	Colony	A. palmata	1			20.8469	-79.0248	OFY	Lisadys	Víctor
31/08/2017	741	Colony	A. palmata	1			20.8469	-79.0248	OFY	Lisadys	Víctor
31/08/2017	742	Colony	A. palmata	1			20.847	-79.025	OFY	Lisadys	Víctor
31/08/2017	743	Colony	A. palmata	1			20.847	-79.025	OFY	Lisadys	Víctor
31/08/2017	744	Colony	A. palmata	1			20.847	-79.025	OFY	Lisadys	Víctor
31/08/2017	745	Colony	A. palmata	1			20.847	-79.025	OFY	Lisadys	Víctor
31/08/2017	746	Colony	A. palmata	1			20.847	-79.0251	OFY	Lisadys	Víctor
31/08/2017	747	Colony	A. palmata	1			20.847	-79.0251	OFY	Lisadys	Víctor
31/08/2017	748	Colony	A. palmata	1		3	20.847	-79.0251	OFY	Lisadys	Víctor
31/08/2017	749	Colony	A. palmata	1			20.847	-79.0251	OFY	Lisadys	Víctor
31/08/2017	750	Colony	A. palmata	1			20.8469	-79.0251	OFY	Lisadys	Víctor
31/08/2017	751	Colony	A. palmata	1			20.8469	-79.0252	OFY	Lisadys	Víctor
31/08/2017	752	Colony	A. palmata	1			20.8471	-79.0254	OFY	Lisadys	Víctor
31/08/2017	753	Colony	A. palmata	1			20.8471	-79.0254	OFY	Lisadys	Víctor
31/08/2017	754	Colony	A. palmata	1			20.8472	-79.0255	OFY	Lisadys	Víctor
31/08/2017	755	Colony	A. palmata	1			20.8472	-79.0255	OFY	Lisadys	Víctor
31/08/2017	756	Colony	A. palmata	1			20.8471	-79.0255	OFY	Lisadys	Víctor
31/08/2017	757	Colony	A. palmata	1			20.8471	-79.0256	OFY	Lisadys	Víctor
31/08/2017	758	A. cervicornis	A. cervicornis	1			20.8472	-79.0256	OFY	Lisadys	Víctor
31/08/2017	759	Colony	A. palmata			5	20.8473	-79.0257	OFY	Lisadys	Víctor
31/08/2017	760	Colony	A. palmata	1			20.8473	-79.0257	OFY	Lisadys	Víctor
31/08/2017	761	Colony	A. palmata	1			20.8473	-79.0257	OFY	Lisadys	Víctor
31/08/2017	762	Colony	A. palmata	1			20.8473	-79.0257	OFY	Lisadys	Víctor
31/08/2017	763	Colony	A. palmata	1			20.8473	-79.0257	OFY	Lisadys	Víctor
31/08/2017	764	Colony	A. palmata	1			20.8473	-79.0257	OFY	Lisadys	Víctor
31/08/2017	765	Colony	A. palmata	1			20.8473	-79.0257	OFY	Lisadys	Víctor
31/08/2017	766	Colony	A. palmata	1			20.8474	-79.0258	OFY	Lisadys	Víctor
31/08/2017	767	Colony	A. palmata	1			20.8474	-79.0258	OFY	Lisadys	Víctor
31/08/2017	768	Colony	A. palmata	1			20.8475	-79.0259	OFY	Lisadys	Víctor
31/08/2017	769	Colony	A. palmata	1		1	20.8475	-79.0259	OFY	Lisadys	Víctor
31/08/2017	770	Colony	A. palmata	1			20.8476	-79.0259	OFY	Lisadys	Víctor
31/08/2017	771	Colony	A. palmata	1			20.8476	-79.0259	OFY	Lisadys	Víctor
31/08/2017	772	Colony	A. palmata	1			20.8475	-79.0259	OFY	Lisadys	Víctor
31/08/2017	773	Colony	A. palmata	1			20.8476	-79.0259	OFY	Lisadys	Víctor
31/08/2017	774	Colony	A. palmata	1			20.8476	-79.0259	OFY	Lisadys	Víctor
31/08/2017	775	Colony	A. palmata			5	20.8477	-79.0259	OFY	Lisadys	Víctor
31/08/2017	776	Colony	A. palmata	1			20.8478	-79.0259	OFY	Lisadys	Víctor
31/08/2017	777	Colony	A. palmata	1			20.848	-79.026	OFY	Lisadys	Víctor
31/08/2017	778	Colony	A. palmata	1			20.8484	-79.0261	OFY	Lisadys	Víctor
31/08/2017	779	Colony	A. palmata	1			20.8484	-79.0261	OFY	Lisadys	Víctor
31/08/2017	780	Colony	A. palmata	1			20.8484	-79.0261	OFY	Lisadys	Víctor
31/08/2017	781	Colony	A. palmata	1			20.8484	-79.026	OFY	Lisadys	Víctor
31/08/2017	782	Colony	A. palmata	1			20.8484	-79.026	OFY	Lisadys	Víctor
31/08/2017	783	Colony	A. palmata	1			20.8484	-79.026	OFY	Lisadys	Víctor
31/08/2017	784	Colony	A. palmata	1			20.8484	-79.0263	OFY	Lisadys	Víctor
31/08/2017	785	Colony	A. palmata	1			20.8484	-79.0264	OFY	Lisadys	Víctor
31/08/2017	786	Colony	A. palmata	1			20.8485	-79.0264	OFY	Lisadys	Víctor
31/08/2017	787	Colony	A. palmata	1			20.8486	-79.0263	OFY	Lisadys	Víctor
31/08/2017	788	Colony	A. palmata	1			20.8486	-79.0263	OFY	Lisadys	Víctor
31/08/2017	789	Colony	A. palmata	1			20.8485	-79.0266	OFY	Lisadys	Víctor
31/08/2017	790	Colony	A. palmata	1			20.8485	-79.0265	OFY	Lisadys	Víctor
31/08/2017	791	Colony	A. palmata	1			20.8484	-79.0265	OFY	Lisadys	Víctor
31/08/2017	792	Colony	A. palmata	1			20.8484	-79.0266	OFY	Lisadys	Víctor
31/08/2017	793	Colony	A. palmata	1			20.8484	-79.0266	OFY	Lisadys	Víctor
31/08/2017	794	Colony	A. palmata	1			20.8509	-79.0301	OFY	Lisadys	Víctor
31/08/2017	795	Colony	A. palmata	1			20.8509	-79.0302	OFY	Lisadys	Víctor
31/08/2017	796	Colony	A. palmata	1			20.8509	-79.0302	OFY	Lisadys	Víctor
31/08/2017	797	Colony	A. palmata	1			20.851	-79.0303	OFY	Lisadys	Víctor
31/08/2017	798	Colony	A. palmata	1			20.851	-79.0303	OFY	Lisadys	Víctor
31/08/2017	799	Colony	A. palmata	1			20.851	-79.0303	OFY	Lisadys	Víctor
31/08/2017	800	Colony	A. palmata	1			20.8511	-79.0303	OFY	Lisadys	Víctor
31/08/2017	801	Colony	A. palmata	1			20.8511	-79.0304	OFY	Lisadys	Víctor
31/08/2017	802	Colony	A. palmata	1			20.8515	-79.0312	OFY	Lisadys	Víctor
31/08/2017	803	Colony	A. palmata	1			20.8515	-79.0312	OFY	Lisadys	Víctor
31/08/2017	804	Colony	A. palmata	1			20.8515	-79.0312	OFY	Lisadys	Víctor
31/08/2017	805	A. cervicornis	A. cervicornis	1			20.8514	-79.0313	OFY	Lisadys	Víctor
31/08/2017	806	Colony	A. palmata	1			20.8514	-79.0315	OFY	Lisadys	Víctor
31/08/2017	807	Colony	A. palmata	1			20.8514	-79.0316	OFY	Lisadys	Víctor
31/08/2017	808	Colony	A. palmata	1			20.8515	-79.0315	OFY	Lisadys	Víctor
31/08/2017	809	Colony	A. palmata	1			20.8514	-79.0316	OFY	Lisadys	Víctor
31/08/2017	810	Colony	A. palmata	1			20.8514	-79.0316	OFY	Lisadys	Víctor
31/08/2017	811	Colony	A. palmata	1			20.8514	-79.0316	OFY	Lisadys	Víctor
31/08/2017	812	Colony	A. palmata	1			20.8514	-79.0316	OFY	Lisadys	Víctor
31/08/2017	813	Colony	A. palmata	1			20.8514	-79.0316	OFY	Lisadys	Víctor
31/08/2017	814	Colony	A. palmata	1			20.8514	-79.0316	OFY	Lisadys	Víctor
31/08/2017	815	Colony	A. palmata	1			20.8514	-79.0316	OFY	Lisadys	Víctor
31/08/2017	816	Colony	A. palmata	1			20.8514	-79.0316	OFY	Lisadys	Víctor
31/08/2017	817	Colony	A. palmata	1			20.8514	-79.0318	OFY	Lisadys	Víctor
31/08/2017	818	Colony	A. palmata	1			20.8514	-79.032	OFY	Lisadys	Víctor
31/08/2017	819	Colony	A. palmata	1			20.8513	-79.032	OFY	Lisadys	Víctor
31/08/2017	820	Colony	A. palmata	1			20.8513	-79.032	OFY	Lisadys	Víctor
31/08/2017	822	Colony	A. palmata	1			20.8523	-79.037	OFY	Lisadys	Víctor
31/08/2017	823	Colony	A. palmata	1			20.8523	-79.037	OFY	Lisadys	Víctor
42744	824	Colony	A. palmata	1			20.8522	-79.037	OFY	Lisadys	Víctor
42744	825	Colony	A. palmata	1			20.8522	-79.0371	OFY	Lisadys	Víctor
42744	826	Colony	A. palmata	1			20.8522	-79.0371	OFY	Lisadys	Víctor
42744	827	Colony	A. palmata	1			20.8522	-79.0371	OFY	Lisadys	Víctor
42744	828	Colony	A. palmata			4	20.8522	-79.0371	OFY	Lisadys	Víctor
42744	829	Colony	A. palmata	1			20.8522	-79.0371	OFY	Lisadys	Víctor
42744	830	Colony	A. palmata	1			20.8522	-79.0371	OFY	Lisadys	Víctor
42744	831	Colony	A. palmata	1			20.8522	-79.0371	OFY	Lisadys	Víctor
42744	832	Colony	A. palmata	1			20.8522	-79.0372	OFY	Lisadys	Víctor
42744	833	Colony	A. palmata			2	20.8522	-79.0372	OFY	Lisadys	Víctor
42744	834	Colony	A. palmata	1			20.8522	-79.0372	OFY	Lisadys	Víctor
42744	835	Colony	A. palmata	1			20.8526	-79.0381	OFY	Lisadys	Víctor
42744	836	Colony	A. palmata	1			20.8526	-79.0382	OFY	Lisadys	Víctor
42744	837	Colony	A. palmata	1			20.8526	-79.0382	OFY	Lisadys	Víctor
42744	838	Colony	A. palmata	1			20.8526	-79.0382	OFY	Lisadys	Víctor
42744	839	Colony	A. palmata			2	20.8526	-79.0383	OFY	Lisadys	Víctor
42744	840	Colony	A. palmata	1			20.8526	-79.0383	OFY	Lisadys	Víctor
42744	841	Colony	A. palmata	1			20.8525	-79.0383	OFY	Lisadys	Víctor
42744	842	Colony	A. palmata			2	20.8525	-79.0383	OFY	Lisadys	Víctor
42744	843	Colony	A. palmata	1			20.8525	-79.0383	OFY	Lisadys	Víctor
42744	844	Colony	A. palmata	1			20.8525	-79.0383	OFY	Lisadys	Víctor
42744	845	Colony	A. palmata	1			20.8525	-79.0384	OFY	Lisadys	Víctor
42744	846	Colony	A. palmata	1			20.8525	-79.0386	OFY	Lisadys	Víctor
42744	847	Colony	A. palmata	1			20.8525	-79.0387	OFY	Lisadys	Víctor
42744	848	Colony	A. palmata	1			20.8525	-79.0388	OFY	Lisadys	Víctor
42744	849	Colony	A. palmata	1			20.8525	-79.0388	OFY	Lisadys	Víctor
42744	850	Colony	A. palmata	1			20.8526	-79.0388	OFY	Lisadys	Víctor
42744	851	Colony	A. palmata	1			20.8525	-79.0388	OFY	Lisadys	Víctor
42744	852	Colony	A. palmata	1			20.8525	-79.0388	OFY	Lisadys	Víctor
42744	853	Colony	A. palmata	1			20.8525	-79.0389	OFY	Lisadys	Víctor
42744	854	Colony	A. palmata	1			20.8526	-79.039	OFY	Lisadys	Víctor
42744	855	Colony	A. palmata	1			20.8526	-79.039	OFY	Lisadys	Víctor
42744	856	Colony	A. palmata	1			20.8526	-79.039	OFY	Lisadys	Víctor
42744	857	Colony	A. palmata	1			20.8526	-79.039	OFY	Lisadys	Víctor
42744	858	Colony	A. palmata	1			20.8526	-79.039	OFY	Lisadys	Víctor
42744	859	Colony	A. palmata	1			20.8526	-79.039	OFY	Lisadys	Víctor
42744	860	Colony	A. palmata	1			20.8526	-79.0391	OFY	Lisadys	Víctor
42744	861	Colony	A. palmata	1			20.8547	-79.0439	OFY	Lisadys	Víctor
42744	862	Colony	A. palmata	1			20.855	-79.0437	OFY	Lisadys	Víctor
42744	863	Colony	A. palmata	1			20.8551	-79.0439	OFY	Lisadys	Víctor
42744	864	Colony	A. palmata	1			20.8551	-79.0439	OFY	Lisadys	Víctor
42744	865	Colony	A. palmata	1			20.8555	-79.0444	OFY	Lisadys	Víctor
42744	866	Colony	A. palmata	1			20.8555	-79.0444	OFY	Lisadys	Víctor
42744	867	Colony	A. palmata	1			20.8555	-79.0445	OFY	Lisadys	Víctor
42744	868	Colony	A. palmata	1			20.8556	-79.0445	OFY	Lisadys	Víctor
42744	869	Colony	A. palmata	1			20.8556	-79.0445	OFY	Lisadys	Víctor
42744	870	Colony	A. palmata	1			20.8556	-79.0446	OFY	Lisadys	Víctor
42744	871	Colony	A. palmata	1			20.8556	-79.0446	OFY	Lisadys	Víctor
42744	872	Colony	A. palmata	1			20.8556	-79.0446	OFY	Lisadys	Víctor
42744	873	Colony	A. palmata	1			20.8556	-79.0446	OFY	Lisadys	Víctor
42744	874	Colony	A. palmata	1			20.8556	-79.0446	OFY	Lisadys	Víctor
42744	875	Colony	A. palmata	1			20.8555	-79.0446	OFY	Lisadys	Víctor
42744	876	Colony	A. palmata	1			20.8555	-79.0446	OFY	Lisadys	Víctor
42744	877	Colony	A. palmata	1			20.8555	-79.0446	OFY	Lisadys	Víctor
42744	878	Colony	A. palmata	1			20.8557	-79.0448	OFY	Lisadys	Víctor
42744	879	Colony	A. palmata	1			20.8557	-79.0448	OFY	Lisadys	Víctor
42744	880	Colony	A. palmata	1			20.8557	-79.045	OFY	Lisadys	Víctor
42744	881	Colony	A. palmata	1			20.8561	-79.0451	OFY	Lisadys	Víctor
42744	882	Colony	A. palmata	1			20.856	-79.0452	OFY	Lisadys	Víctor
42744	883	Colony	A. palmata	1			20.856	-79.0452	OFY	Lisadys	Víctor
42744	884	Colony	A. palmata	1			20.856	-79.0452	OFY	Lisadys	Víctor
42744	885	Colony	A. palmata	1			20.856	-79.0453	OFY	Lisadys	Víctor
42744	886	Colony	A. palmata	1			20.856	-79.0452	OFY	Lisadys	Víctor
42744	887	Colony	A. palmata	1			20.856	-79.0453	OFY	Lisadys	Víctor
42744	888	Colony	A. palmata	1			20.856	-79.0453	OFY	Lisadys	Víctor
42744	889	Colony	A. palmata	1			20.856	-79.0453	OFY	Lisadys	Víctor
42744	890	Colony	A. palmata	1			20.856	-79.0453	OFY	Lisadys	Víctor
42744	891	Colony	A. palmata	1			20.856	-79.0453	OFY	Lisadys	Víctor
42744	892	Colony	A. palmata	1			20.856	-79.0453	OFY	Lisadys	Víctor
42744	893	Colony	A. palmata			2	20.856	-79.0453	OFY	Lisadys	Víctor
42744	894	Colony	A. palmata	1			20.8559	-79.0454	OFY	Lisadys	Víctor
42744	895	Colony	A. palmata	1			20.856	-79.0454	OFY	Lisadys	Víctor
42744	896	Colony	A. palmata	1			20.8561	-79.0455	OFY	Lisadys	Víctor
42744	897	Colony	A. palmata	1			20.8561	-79.0457	OFY	Lisadys	Víctor
42744	898	Colony	A. palmata	1			20.8562	-79.0457	OFY	Lisadys	Víctor
42744	899	Colony	A. palmata	1			20.8562	-79.0457	OFY	Lisadys	Víctor
42744	900	Colony	A. palmata	1			20.8562	-79.0457	OFY	Lisadys	Víctor
42744	901	Colony	A. palmata	1			20.8563	-79.0458	OFY	Lisadys	Víctor
42744	902	Colony	A. palmata	1			20.8563	-79.0458	OFY	Lisadys	Víctor
42744	903	Colony	A. palmata	1			20.8563	-79.0458	OFY	Lisadys	Víctor
42744	904	Colony	A. palmata	1			20.8563	-79.0458	OFY	Lisadys	Víctor
42744	905	Colony	A. palmata	1			20.8563	-79.0458	OFY	Lisadys	Víctor
42744	906	Colony	A. palmata	1			20.8563	-79.0458	OFY	Lisadys	Víctor
42744	907	Colony	A. palmata	1			20.8563	-79.0458	OFY	Lisadys	Víctor
42744	908	Colony	A. palmata	1			20.8563	-79.0458	OFY	Lisadys	Víctor
42744	909	Colony	A. palmata	1			20.8563	-79.0458	OFY	Lisadys	Víctor
42744	910	Colony	A. palmata	1			20.8564	-79.0458	OFY	Lisadys	Víctor
42744	911	Colony	A. palmata			4	20.8564	-79.0458	OFY	Lisadys	Víctor
42744	912	Colony	A. palmata	1			20.8564	-79.0459	OFY	Lisadys	Víctor
42744	913	Colony	A. palmata	1			20.8563	-79.0459	OFY	Lisadys	Víctor
42744	914	Colony	A. palmata			3	20.8563	-79.0459	OFY	Lisadys	Víctor
42744	915	Colony	A. palmata	1			20.8563	-79.0459	OFY	Lisadys	Víctor
42744	916	Colony	A. palmata	1			20.8563	-79.0459	OFY	Lisadys	Víctor
42744	917	Colony	A. palmata	1			20.8565	-79.0461	OFY	Lisadys	Víctor
42744	918	Colony	A. palmata	1			20.8565	-79.046	OFY	Lisadys	Víctor
42744	920	Colony	A. palmata	1			20.8582	-79.0486	OFY	Lisadys	Víctor
42744	921	Colony	A. palmata	1			20.8582	-79.0486	OFY	Lisadys	Víctor
42744	922	Colony	A. palmata	1			20.8581	-79.0487	OFY	Lisadys	Víctor
42744	923	Colony	A. palmata	1			20.8582	-79.0487	OFY	Lisadys	Víctor
42744	924	Colony	A. palmata	1			20.8581	-79.0487	OFY	Lisadys	Víctor
42744	925	Colony	A. palmata	1			20.8581	-79.0487	OFY	Lisadys	Víctor
42744	926	Colony	A. palmata	1			20.8581	-79.0487	OFY	Lisadys	Víctor
42744	927	Colony	A. palmata	1			20.8581	-79.0487	OFY	Lisadys	Víctor
42744	928	Colony	A. palmata	1			20.8581	-79.0488	OFY	Lisadys	Víctor
42744	929	Colony	A. palmata	1			20.8582	-79.049	OFY	Lisadys	Víctor
42744	930	Colony	A. palmata	1			20.8583	-79.0491	OFY	Lisadys	Víctor
42744	931	Colony	A. palmata	1			20.8585	-79.0492	OFY	Lisadys	Víctor
42744	932	Colony	A. palmata	1			20.8586	-79.0492	OFY	Lisadys	Víctor
42744	933	Colony	A. palmata	1			20.8586	-79.0492	OFY	Lisadys	Víctor
42744	934	Colony	A. palmata	1			20.8586	-79.0492	OFY	Lisadys	Víctor
42744	935	Colony	A. palmata	1			20.8586	-79.0493	OFY	Lisadys	Víctor
42744	936	Colony	A. palmata	1			20.8585	-79.0492	OFY	Lisadys	Víctor
42744	937	Colony	A. palmata	1			20.8585	-79.0493	OFY	Lisadys	Víctor
42744	938	Colony	A. palmata			7	20.8584	-79.0492	OFY	Lisadys	Víctor
42744	939	Colony	A. palmata	1			20.8584	-79.0492	OFY	Lisadys	Víctor
42744	940	Colony	A. palmata	1			20.8584	-79.0493	OFY	Lisadys	Víctor
42744	941	Colony	A. palmata	1			20.8586	-79.0494	OFY	Lisadys	Víctor
42744	942	Colony	A. palmata	1			20.8585	-79.0494	OFY	Lisadys	Víctor
42744	943	Colony	A. palmata	1			20.8586	-79.0494	OFY	Lisadys	Víctor
42744	944	Colony	A. palmata	1			20.8586	-79.0494	OFY	Lisadys	Víctor
42744	945	Colony	A. palmata	1			20.8586	-79.0494	OFY	Lisadys	Víctor
42744	946	Colony	A. palmata	1			20.8586	-79.0494	OFY	Lisadys	Víctor
42744	947	Colony	A. palmata	1			20.8586	-79.0494	OFY	Lisadys	Víctor
42744	948	Colony	A. palmata	1			20.8586	-79.0494	OFY	Lisadys	Víctor
42744	949	Colony	A. palmata			2	20.8586	-79.0494	OFY	Lisadys	Víctor
42744	950	Colony	A. palmata	1			20.8586	-79.0494	OFY	Lisadys	Víctor
42744	951	Colony	A. palmata	1			20.8586	-79.0494	OFY	Lisadys	Víctor
42744	952	Colony	A. palmata	1			20.8586	-79.0494	OFY	Lisadys	Víctor
42744	953	Colony	A. palmata	1			20.8586	-79.0493	OFY	Lisadys	Víctor
42744	954	Colony	A. palmata	1			20.8587	-79.0493	OFY	Lisadys	Víctor
42744	955	Colony	A. palmata	1			20.8587	-79.0493	OFY	Lisadys	Víctor
42744	956	Colony	A. palmata	1			20.8587	-79.0493	OFY	Lisadys	Víctor
42744	957	Colony	A. palmata			3	20.8587	-79.0493	OFY	Lisadys	Víctor
42744	958	Colony	A. palmata	1			20.8587	-79.0493	OFY	Lisadys	Víctor
42744	959	Colony	A. palmata	1			20.8587	-79.0494	OFY	Lisadys	Víctor
42744	960	Colony	A. palmata	1			20.8587	-79.0494	OFY	Lisadys	Víctor
42744	961	Colony	A. palmata	1			20.8589	-79.0497	OFY	Lisadys	Víctor
42744	962	Colony	A. palmata	1			20.8589	-79.0498	OFY	Lisadys	Víctor
42744	963	Colony	A. palmata	1			20.8588	-79.0498	OFY	Lisadys	Víctor
42744	964	Colony	A. palmata	1			20.8589	-79.0499	OFY	Lisadys	Víctor
42744	965	Colony	A. palmata	1			20.8589	-79.0499	OFY	Lisadys	Víctor
42744	966	Colony	A. palmata	1			20.8589	-79.0499	OFY	Lisadys	Víctor
42744	967	Colony	A. palmata	1			20.8589	-79.0499	OFY	Lisadys	Víctor
42744	968	Colony	A. palmata	1			20.8589	-79.0499	OFY	Lisadys	Víctor
42744	969	Colony	A. palmata	1			20.8588	-79.0499	OFY	Lisadys	Víctor
42744	970	Colony	A. palmata	1			20.8589	-79.0499	OFY	Lisadys	Víctor
42744	971	Colony	A. palmata	1			20.8589	-79.0499	OFY	Lisadys	Víctor
42744	972	Colony	A. palmata	1			20.8589	-79.0499	OFY	Lisadys	Víctor
42744	973	Colony	A. palmata	1			20.8589	-79.0499	OFY	Lisadys	Víctor
42744	974	Colony	A. palmata	1			20.859	-79.0499	OFY	Lisadys	Víctor
42744	975	Colony	A. palmata	1			20.8591	-79.0501	OFY	Lisadys	Víctor
42744	976	Colony	A. palmata	1			20.8591	-79.0501	OFY	Lisadys	Víctor
42744	977	Colony	A. palmata	1			20.8591	-79.0501	OFY	Lisadys	Víctor
42744	978	Colony	A. palmata	1			20.8591	-79.0501	OFY	Lisadys	Víctor
42744	979	Colony	A. palmata	1			20.8592	-79.0501	OFY	Lisadys	Víctor
42744	980	Colony	A. palmata	1			20.8592	-79.0501	OFY	Lisadys	Víctor
42744	981	Colony	A. palmata	1			20.8592	-79.0501	OFY	Lisadys	Víctor
42744	982	Colony	A. palmata	1			20.8592	-79.0501	OFY	Lisadys	Víctor
42744	983	Colony	A. palmata	1			20.8592	-79.05	OFY	Lisadys	Víctor
42744	984	Colony	A. palmata	1			20.8592	-79.0501	OFY	Lisadys	Víctor
42744	985	Colony	A. palmata	1			20.8593	-79.0501	OFY	Lisadys	Víctor
42744	986	Colony	A. palmata	1			20.8593	-79.0501	OFY	Lisadys	Víctor
42744	987	Colony	A. palmata	1			20.8595	-79.0506	OFY	Lisadys	Víctor
42744	988	Colony	A. palmata	1			20.8595	-79.0506	OFY	Lisadys	Víctor
42744	989	Colony	A. palmata	1			20.8595	-79.0506	OFY	Lisadys	Víctor
42744	990	Colony	A. palmata	1			20.8595	-79.0506	OFY	Lisadys	Víctor
42744	991	Colony	A. palmata	1			20.8595	-79.0507	OFY	Lisadys	Víctor
42744	992	Colony	A. palmata	1			20.8595	-79.0507	OFY	Lisadys	Víctor
42744	993	Colony	A. palmata	1			20.8595	-79.0507	OFY	Lisadys	Víctor
42744	994	Colony	A. palmata	1			20.8595	-79.0508	OFY	Lisadys	Víctor
42744	995	Colony	A. palmata	1			20.8637	-79.0554	OFY	Lisadys	Víctor
42744	996	Colony	A. palmata	1			20.8637	-79.0554	OFY	Lisadys	Víctor
42744	997	Colony	A. palmata	1			20.8638	-79.0556	OFY	Lisadys	Víctor
42744	998	Colony	A. palmata	1			20.8644	-79.056	OFY	Lisadys	Víctor
42744	999	Colony	A. palmata	1			20.8889	-79.0722	OFY	Lisadys	Víctor
42744	1000	Colony	A. palmata	1			20.8889	-79.0722	OFY	Lisadys	Víctor
42744	1001	Colony	A. palmata	1			20.889	-79.0726	OFY	Lisadys	Víctor
42744	866	Colony	A. palmata	1			20.8528	-79.0393	2	Leslie	Maysel
42744	867	Colony	A. palmata	1			20.8529	-79.0395	2	Leslie	Maysel
42744	868	Colony	A. palmata	1		3	20.8524	-79.0393	2	Leslie	Maysel
42744	869	Colony	A. palmata	1			20.8525	-79.0393	2	Leslie	Maysel
42744	870	Colony	A. palmata	1			20.8528	-79.0398	2	Leslie	Maysel
42744	871	Colony	A. palmata	1			20.8528	-79.0398	2	Leslie	Maysel
42744	872	Colony	A. palmata	1			20.8528	-79.0398	2	Leslie	Maysel
42744	873	Colony	A. palmata	1			20.8528	-79.0399	2	Leslie	Maysel
42744	874	Colony	A. palmata	1		6	20.8527	-79.04	2	Leslie	Maysel
42744	875	Colony	A. palmata	1			20.8527	-79.0399	2	Leslie	Maysel
42744	876	Colony	A. palmata	1			20.8527	-79.0399	2	Leslie	Maysel
42744	877	Colony	A. palmata	1			20.8526	-79.0399	2	Leslie	Maysel
42744	878	Colony	A. palmata	1			20.8526	-79.0399	2	Leslie	Maysel
42744	879	Fragments	A. palmata			3	20.8527	-79.0402	2	Leslie	Maysel
42744	880	Colony	A. palmata	1			20.8528	-79.0402	2	Leslie	Maysel
42744	881	Colony	A. palmata	1			20.8528	-79.0401	2	Leslie	Maysel
42744	882	Colony	A. palmata	1			20.8528	-79.0401	2	Leslie	Maysel
42744	883	Fragments	A. palmata			2	20.8528	-79.0401	2	Leslie	Maysel
42744	884	Colony	A. palmata	1			20.8529	-79.0402	2	Leslie	Maysel
42744	885	Colony	A. palmata	1			20.8527	-79.0403	2	Leslie	Maysel
42744	886	Colony	A. palmata	1			20.8527	-79.0403	2	Leslie	Maysel
42744	887	Fragments	A. palmata			6	20.8527	-79.0403	2	Leslie	Maysel
42744	888	Colony	A. palmata	2		6	20.8526	-79.0402	2	Leslie	Maysel
42744	889	Colony	A. palmata	1			20.8526	-79.0402	2	Leslie	Maysel
42744	890	Colony	A. palmata	1			20.8529	-79.041	2	Leslie	Maysel
42744	891	Colony	A. palmata	1		2	20.853	-79.041	2	Leslie	Maysel
42744	892	Colony	A. palmata	1			20.8531	-79.0411	2	Leslie	Maysel
42744	893	Colony	A. palmata	1			20.8531	-79.0411	2	Leslie	Maysel
42744	894	Colony	A. palmata	1			20.8532	-79.041	2	Leslie	Maysel
42744	895	Colony	A. palmata	1			20.8535	-79.0413	2	Leslie	Maysel
42744	896	Colony	A. palmata	1			20.8535	-79.0413	2	Leslie	Maysel
42744	897	Colony	A. palmata	1			20.8535	-79.0414	2	Leslie	Maysel
42744	898	Colony	A. palmata	1		2	20.8532	-79.0415	2	Leslie	Maysel
42744	899	Colony	A. palmata	1			20.8532	-79.0415	2	Leslie	Maysel
42744	900	Colony	A. palmata	1			20.8532	-79.0415	2	Leslie	Maysel
42744	902	Fragments	A. palmata	1		2	20.8568	-79.0463	2	Leslie	Maysel
42744	903	Colony	A. palmata	1			20.8568	-79.0462	2	Leslie	Maysel
42744	904	Colony	A. palmata	1			20.8568	-79.0464	2	Leslie	Maysel
42744	905	Colony	A. palmata	1			20.8569	-79.0464	2	Leslie	Maysel
42744	906	Colony	A. palmata	1			20.8571	-79.0464	2	Leslie	Maysel
42744	907	Colony	A. palmata	1			20.857	-79.0466	2	Leslie	Maysel
42744	908	Colony	A. palmata	1			20.857	-79.0465	2	Leslie	Maysel
42744	909	Colony	A. palmata	1			20.857	-79.0465	2	Leslie	Maysel
42744	910	Colony	A. palmata	2			20.8571	-79.0464	2	Leslie	Maysel
42744	911	Fragments	A. palmata			3	20.8571	-79.0464	2	Leslie	Maysel
42744	912	Colony	A. palmata	1			20.8575	-79.0473	2	Leslie	Maysel
42744	913	Colony	A. palmata	1			20.8575	-79.0473	2	Leslie	Maysel
42744	914	Colony	A. palmata	1			20.8573	-79.0474	2	Leslie	Maysel
42744	915	Colony	A. palmata	1			20.8574	-79.0476	2	Leslie	Maysel
42744	916	Colony	A. palmata	1			20.8574	-79.0476	2	Leslie	Maysel
42744	917	Colony	A. palmata	1		2	20.8574	-79.0476	2	Leslie	Maysel
42744	918	Colony	A. palmata	1			20.8573	-79.0476	2	Leslie	Maysel
42744	919	Colony	A. palmata	1		3	20.8573	-79.0476	2	Leslie	Maysel
42744	920	Colony	A. palmata	1			20.8574	-79.0477	2	Leslie	Maysel
42744	921	Colony	A. palmata	1			20.8575	-79.0478	2	Leslie	Maysel
42744	922	Colony	A. palmata	1			20.8574	-79.0478	2	Leslie	Maysel
42744	923	Colony	A. palmata	1			20.8574	-79.0479	2	Leslie	Maysel
42744	924	Colony	A. palmata	3			20.8576	-79.0478	2	Leslie	Maysel
42744	925	Colony	A. palmata	1			20.8576	-79.0478	2	Leslie	Maysel
42744	926	Colony	A. palmata	1			20.8577	-79.0477	2	Leslie	Maysel
42744	927	Colony	A. palmata	1		2	20.8577	-79.0477	2	Leslie	Maysel
42744	929	Colony	A. palmata	1			20.8578	-79.0483	2	Leslie	Maysel
42744	930.333	Colony	A. palmata	1			20.8631	-79.0541	2	Leslie	Maysel
42744	931	Colony	A. palmata	1			20.8629	-79.0547	2	Leslie	Maysel
42744	932	Colony	A. palmata	1		2	20.8629	-79.0547	2	Leslie	Maysel
42744	932.778	Colony	A. palmata	1			20.8629	-79.0547	2	Leslie	Maysel
42744	933.611	Colony	A. palmata	1		1	20.863	-79.0547	2	Leslie	Maysel
42744	935	Colony	A. palmata	1			20.8632	-79.0548	2	Leslie	Maysel
42744	936.389	Colony	A. palmata	1			20.8633	-79.0549	2	Leslie	Maysel
42744	937	Colony	A. palmata	1			20.8632	-79.0549	2	Leslie	Maysel
42744	938	Colony	A. palmata	1			20.8632	-79.0551	2	Leslie	Maysel
42744	939	Colony	A. palmata	3			20.8632	-79.0552	2	Leslie	Maysel
42744	939.961	Colony	A. palmata	1			20.8633	-79.0552	2	Leslie	Maysel
42744	940.922	Colony	A. palmata	1			20.888	-79.0711	2	Leslie	Maysel
42744	154	Colony	A. palmata	1			20.8523	-79.0356	1	Dayli	Maydel
42744	156	Colony	A. palmata	1			20.8536	-79.0417	1	Dayli	Maydel
42744	157	Colony	A. palmata	1			20.8535	-79.0417	1	Dayli	Maydel
42744	158	Colony	A. palmata	1			20.8535	-79.0418	1	Dayli	Maydel
42744	159	Colony	A. palmata	1			20.8536	-79.0419	1	Dayli	Maydel
42744	160	Colony	A. palmata	1			20.8537	-79.042	1	Dayli	Maydel
42744	161	Colony	A. palmata	1			20.8535	-79.0419	1	Dayli	Maydel
42744	162	Colony	A. palmata	1		6	20.8538	-79.042	1	Dayli	Maydel
42744	163	Colony	A. palmata	1			20.8538	-79.042	1	Dayli	Maydel
42744	164	Colony	A. palmata	1			20.854	-79.0423	1	Dayli	Maydel
42744	165	Colony	A. palmata	1			20.854	-79.0425	1	Dayli	Maydel
42744	166	Colony	A. palmata	1			20.8539	-79.0425	1	Dayli	Maydel
42744	167	Colony	A. palmata	1			20.8539	-79.0424	1	Dayli	Maydel
42744	168	Colony	A. palmata	8		4	20.8539	-79.0431	1	Dayli	Maydel
42744	169	Colony	A. palmata	1			20.8546	-79.0432	1	Dayli	Maydel
42744	170	Colony	A. palmata	2			20.8547	-79.0432	1	Dayli	Maydel
42744	171	Fragments	A. palmata			4	20.8547	-79.0432	1	Dayli	Maydel
42744	172	Colony	A. palmata	2			20.8546	-79.0432	1	Dayli	Maydel
42744	173	Colony	A. palmata	2			20.8546	-79.0432	1	Dayli	Maydel
42744	174	Colony	A. palmata	3			20.8546	-79.0432	1	Dayli	Maydel
42744	175	Colony	A. palmata	2			20.8546	-79.0432	1	Dayli	Maydel
42744	176	Colony	A. palmata	3			20.8546	-79.0432	1	Dayli	Maydel
42744	177	Colony	A. palmata	1			20.8545	-79.0432	1	Dayli	Maydel
42744	178	Colony	A. palmata	1		6	20.8545	-79.0433	1	Dayli	Maydel
42744	179	Colony	A. palmata	3			20.8545	-79.0433	1	Dayli	Maydel
42744	180	Colony	A. palmata	1			20.8545	-79.0432	1	Dayli	Maydel
42744	181	Colony	A. palmata	1		6	20.8545	-79.0433	1	Dayli	Maydel
42744	182	Colony	A. palmata	1			20.8546	-79.0433	1	Dayli	Maydel
42744	183	Colony	A. palmata	2			20.8547	-79.0433	1	Dayli	Maydel
42744	184	Colony	A. palmata	1			20.8547	-79.0434	1	Dayli	Maydel
42744	185	Colony	A. palmata	1			20.8547	-79.0433	1	Dayli	Maydel
42744	186	Colony	A. palmata	1			20.8547	-79.0433	1	Dayli	Maydel
42744	187	Colony	A. palmata	4			20.8547	-79.0433	1	Dayli	Maydel
42744	188	Colony	A. palmata	1			20.8547	-79.0433	1	Dayli	Maydel
42744	189	Patch	A. palmata		32		20.8547	-79.0434	1	Dayli	Maydel
42744	190	Patch	A. palmata		32		20.8546	-79.0434	1	Dayli	Maydel
42744	191	Patch	A. palmata		32		20.8546	-79.0435	1	Dayli	Maydel
42744	192	Patch	A. palmata		32		20.8546	-79.0435	1	Dayli	Maydel
42744	193	Patch	A. palmata		32		20.8547	-79.0434	1	Dayli	Maydel
42744	194	Patch	A. palmata		32		20.8547	-79.0434	1	Dayli	Maydel
42744	195	Patch	A. palmata		32		20.8548	-79.0434	1	Dayli	Maydel
42744	196	Patch	A. palmata		32		20.8547	-79.0433	1	Dayli	Maydel
42744	197	Colony	A. palmata	1			20.8547	-79.0435	1	Dayli	Maydel
42744	198	Fragments	A. palmata			20	20.8547	-79.0434	1	Dayli	Maydel
42744	199	Colony	A. palmata	2			20.8547	-79.0434	1	Dayli	Maydel
42744	200	Colony	A. palmata	1			20.8548	-79.0434	1	Dayli	Maydel
42744	201	Colony	A. palmata	1			20.8547	-79.0436	1	Dayli	Maydel
42744	202	Colony	A. palmata	1			20.855	-79.0436	1	Dayli	Maydel
42744	203	Colony	A. palmata	3		3	20.8597	-79.0508	1	Dayli	Maydel
42744	204	Colony	A. palmata	1			20.8597	-79.0508	1	Dayli	Maydel
42744	205	Colony	A. palmata	1			20.8597	-79.0508	1	Dayli	Maydel
42744	206	Colony	A. palmata	1		6	20.8603	-79.0512	1	Dayli	Maydel
42744	207	Colony	A. palmata	3			20.8605	-79.0513	1	Dayli	Maydel
42744	208	Colony	A. palmata	2			20.8605	-79.0513	1	Dayli	Maydel
42744	209	Colony	A. palmata	1			20.8606	-79.0513	1	Dayli	Maydel
42744	1002	Colony	A. palmata	1			20.8971	-79.086	OFY	Fabián	Tamara
42744	1003	Colony	A. palmata	1			20.8972	-79.086	OFY	Fabián	Tamara
42744	1004	Colony	A. palmata	1			20.8972	-79.0861	OFY	Fabián	Tamara
42744	1005	Colony	A. palmata	1			20.8972	-79.0861	OFY	Fabián	Tamara
42744	1006	Colony	A. palmata	1			20.8973	-79.0861	OFY	Fabián	Tamara
42744	1007	Colony	A. palmata	1			20.8972	-79.086	OFY	Fabián	Tamara
42744	1008	Colony	A. palmata	1			20.8974	-79.0865	OFY	Fabián	Tamara
42744	1009	Colony	A. palmata	1			20.8974	-79.0865	OFY	Fabián	Tamara
42744	1010	Colony	A. palmata	1			20.8974	-79.0866	OFY	Fabián	Tamara
42744	1011	Colony	A. palmata	1			20.8977	-79.0868	OFY	Fabián	Tamara
42744	1012	Colony	A. palmata	1			20.8977	-79.087	OFY	Fabián	Tamara
42744	1013	Colony	A. palmata	1			20.8977	-79.087	OFY	Fabián	Tamara
42744	1014	Fragments	A. palmata			13	20.8976	-79.0871	OFY	Fabián	Tamara
42744	1015	Colony	A. palmata	1			20.8975	-79.0871	OFY	Fabián	Tamara
42744	1016	Fragments	A. palmata			21	20.8975	-79.0871	OFY	Fabián	Tamara
42744	1017	Colony	A. palmata	1			20.8975	-79.0871	OFY	Fabián	Tamara
42744	1018	Colony	A. palmata			10	20.8975	-79.0871	OFY	Fabián	Tamara
42744	1019	Fragments	A. palmata	1			20.8975	-79.0872	OFY	Fabián	Tamara
42744	1020	Colony	A. palmata	1			20.8978	-79.0872	OFY	Fabián	Tamara
42744	1021	Colony	A. palmata	1			20.8977	-79.0872	OFY	Fabián	Tamara
42744	1022	Colony	A. palmata	1			20.8978	-79.0872	OFY	Fabián	Tamara
42744	1023	Colony	A. palmata	1			20.8977	-79.0872	OFY	Fabián	Tamara
42744	1024	Colony	A. palmata	1			20.8977	-79.0872	OFY	Fabián	Tamara
42744	1025	Colony	A. palmata	1			20.8977	-79.0873	OFY	Fabián	Tamara
42744	1026	Colony	A. palmata	1			20.8977	-79.0873	OFY	Fabián	Tamara
42744	1027	Colony	A. palmata	1			20.8977	-79.0873	OFY	Fabián	Tamara
42744	1028	Colony	A. palmata	1			20.8978	-79.0873	OFY	Fabián	Tamara
42744	1029	Colony	A. palmata	1			20.8977	-79.0874	OFY	Fabián	Tamara
[truncated: 5,948 more rows]
